# Supplementary material for: A population-based study on prevalence and risk factors of gastroesophageal reflux disease in the Tibet Autonomous Region, China
Source: PeerJ journal article supplement (doi:10.7717/peerj.6491), 2019-02-28
Supplement: Raw_data.xls [file Raw_data.xls]

## Sheet: Sheet1
ID	GERD	Age	Age_G	Gender	Height	Weight	BMI	Edu	edu1	Ethnic	Altitude	Altitude_G	LOR_G	coffee	buttered_tea	sweet_tea	beer	white_wine	red_wine	barley_wine	smoking	dried_meat	Staying_up_late	No_breakfast	GERD_FH	Pharyngitis	Asthma	Precordial_pain	constipation	indigestion	DM	tuberculosis	hydatid_disease	Hepatitis_B	Gastric_disease
1	1	40	4	1	175	72	23.5102	1	1	1	3359	2	2	0	0	0	0	1	0	0	0	0	1	1	0	0	0	1	1	1	0	1	1	1	3
2	1	29	2	1	158	64	25.6369	4	3	1	3456	2	2	0	0	0	1	0	0	1	0	1	1	0	1	1	0	0	1	1	0	0	1	1	1
3	1	44	4	1	160	71	27.7344	2	2	1	2944	1	1	0	0	1	1	1	1	0	1	1	0	0	1	1	1	0	0	1	0	1	1	1	2
4	1	39	3	1	161	64	24.6904	3	2	1	3837	3	1	0	0	1	0	0	1	1	0	1	1	0	1	1	0	1	1	1	0	0	0	1	4
5	1	39	3	1	167	61	21.8724	1	1	1	3761	3	2	1	0	1	1	0	0	0	1	1	1	1	1	0	0	0	0	0	0	1	0	1	2
6	1	29	2	1	170	57	19.7232	1	1	1	3555	3	2	0	0	1	0	0	0	0	1	1	0	1	1	1	1	0	1	0	0	0	1	0	1
7	1	31	3	1	157	63	25.5588	2	2	1	2587	1	1	0	1	1	0	1	1	1	1	1	0	0	1	1	1	1	0	0	0	0	0	0	1
8	1	18	2	1	168	69	24.4473	1	1	1	2814	1	1	0	0	1	0	0	0	0	1	1	1	1	1	1	0	1	1	0	0	1	1	0	1
9	1	36	3	1	173	55	18.3768	3	2	1	2509	1	1	0	1	1	1	1	1	1	1	1	0	0	1	1	0	0	1	0	0	1	0	0	4
10	1	40	3	1	158	61	24.4352	3	2	1	3315	2	2	0	0	1	0	0	0	0	0	0	1	0	0	1	0	1	1	1	0	1	1	0	4
11	1	39	3	1	177	84	26.8122	1	1	1	3657	3	2	0	1	1	1	1	0	0	0	1	1	1	0	0	1	1	1	0	0	1	1	0	4
12	1	39	3	1	167	60	21.5139	1	1	1	3011	2	2	0	1	0	0	0	0	1	0	1	0	0	0	1	1	0	1	0	0	0	1	1	1
13	1	49	4	1	174	55	18.1662	3	2	1	3127	2	2	1	0	0	0	1	0	1	1	0	1	0	1	1	0	0	0	1	0	1	1	1	4
14	1	79	5	2	160	59	23.0469	1	1	1	3803	3	1	0	1	0	0	1	0	1	0	0	0	1	1	0	1	1	1	1	0	0	1	0	3
15	1	72	5	2	163	54	20.3244	2	2	1	3978	3	1	0	1	0	1	1	1	1	1	1	0	1	0	0	1	1	0	1	0	1	1	0	3
16	1	49	4	1	178	85	26.8274	2	2	1	3121	2	2	0	0	0	1	1	0	0	1	1	0	0	0	1	0	1	0	0	0	0	1	0	1
17	1	28	2	2	157	52	21.0962	1	1	1	3917	3	2	1	0	0	0	0	1	0	0	1	0	1	1	1	0	0	1	0	0	0	0	1	4
18	1	18	1	1	169	53	18.5568	4	3	1	2781	1	1	1	0	1	1	1	1	1	0	1	1	0	0	1	0	0	1	1	0	1	0	0	2
19	1	17	1	1	160	56	21.875	4	3	1	2949	1	1	1	0	1	0	1	1	1	1	1	1	1	0	0	1	1	0	0	0	1	1	0	2
20	1	44	4	1	168	50	17.7154	3	2	1	2604	1	2	1	1	1	1	1	1	0	0	0	1	1	1	1	1	0	0	0	0	1	0	0	1
21	1	18	2	1	156	63	25.8876	3	2	1	2959	1	1	0	0	1	0	0	0	0	0	1	1	0	1	0	1	1	1	1	0	1	1	0	4
22	1	53	5	2	170	66	22.8374	2	2	1	2847	1	1	0	0	1	1	1	1	0	1	0	1	0	1	0	0	0	1	1	0	1	0	1	3
23	1	36	3	1	176	74	23.8895	3	2	1	3409	2	1	1	1	1	0	0	0	0	0	0	0	1	1	0	0	1	1	0	0	1	1	0	1
24	1	75	5	2	173	62	20.7157	2	2	1	3693	3	1	0	1	0	1	1	0	0	1	1	1	1	1	0	0	1	0	1	0	0	1	0	4
25	1	39	3	1	168	63	22.3214	1	1	1	3123	2	2	0	0	0	1	1	0	1	1	0	0	0	1	0	1	1	0	0	0	0	0	0	4
26	1	46	4	1	174	76	25.1024	3	2	1	3415	2	2	0	0	1	1	0	0	1	0	0	1	1	0	1	0	1	0	1	0	1	0	1	4
27	1	49	4	1	159	63	24.9199	1	1	1	3230	2	2	0	0	0	1	0	0	1	0	1	1	1	0	0	0	1	0	0	0	1	0	1	1
28	1	18	1	1	156	58	23.833	4	3	1	3202	2	1	1	1	0	0	1	1	0	0	1	0	1	0	1	1	0	1	0	0	0	1	0	2
29	1	18	2	2	170	71	24.5675	1	1	1	4363	4	1	0	1	0	0	1	0	1	1	0	1	1	1	1	0	1	0	1	0	1	1	1	3
30	1	18	1	2	160	50	19.5312	4	3	1	3572	3	1	1	0	0	0	1	1	0	0	0	1	0	0	1	1	0	1	1	0	0	0	1	2
31	1	44	4	2	170	70	24.2215	2	2	1	4096	4	1	0	0	1	0	0	1	1	0	1	1	0	0	1	0	0	1	1	0	1	1	0	2
32	1	39	3	1	168	69	24.4473	2	2	1	3009	2	1	0	1	0	1	1	1	1	1	1	1	0	0	1	1	1	0	1	0	0	1	1	2
33	1	49	4	1	159	60	23.7332	3	2	1	3265	2	2	0	1	1	0	1	0	0	1	1	1	1	0	0	0	1	1	1	0	1	0	1	2
34	1	69	5	2	163	56	21.0772	1	1	1	3377	2	1	0	1	0	0	0	0	1	0	0	0	1	1	0	1	1	0	1	0	0	0	0	4
35	1	29	2	1	162	63	24.0055	1	1	1	3082	2	2	0	1	1	1	1	0	1	0	0	0	0	0	0	0	1	1	0	0	0	0	0	2
36	1	49	4	2	166	67	24.3141	2	2	1	3494	2	2	0	0	0	1	0	0	0	0	0	0	0	0	1	0	0	0	1	0	0	0	1	1
37	1	17	1	2	176	73	23.5666	4	3	1	4163	4	1	1	1	0	1	1	1	1	1	0	1	0	1	1	0	1	0	1	0	1	1	0	4
38	1	49	4	2	177	72	22.9819	2	2	1	3401	2	2	0	0	1	1	1	1	0	0	0	0	0	1	0	0	0	0	1	0	0	1	1	4
39	1	47	4	1	170	67	23.1834	2	2	1	3213	2	1	0	0	0	1	1	1	1	0	1	0	1	1	0	0	1	0	0	0	1	1	1	4
40	1	63	5	2	165	53	19.4674	1	1	1	3393	2	1	0	0	0	1	0	0	0	1	1	0	1	1	0	0	1	0	1	0	0	0	0	1
41	1	33	3	2	167	53	19.0039	4	3	1	4460	4	2	1	0	1	1	0	1	1	0	1	0	1	1	1	0	1	0	0	0	0	1	0	2
42	1	40	3	1	165	59	21.6713	1	1	1	3360	2	2	1	0	0	0	1	1	0	1	0	0	0	1	0	1	0	0	0	0	1	1	1	4
43	1	39	3	2	161	55	21.2183	2	2	1	3493	2	1	1	1	0	0	1	0	1	1	1	0	1	1	0	0	0	1	1	0	0	1	1	4
44	1	48	4	2	172	67	22.6474	2	2	1	3263	2	2	1	1	0	1	1	0	0	1	0	1	0	1	1	1	0	0	1	0	1	0	0	4
45	1	56	5	2	162	67	25.5296	2	2	1	3263	2	1	0	0	0	1	0	0	1	0	1	1	1	0	0	0	0	1	1	0	0	1	1	1
46	1	18	1	2	167	50	17.9282	1	1	1	4413	4	1	0	0	1	1	0	0	1	1	1	0	0	1	0	1	0	1	0	0	1	0	0	2
47	1	49	4	2	176	60	19.3698	3	2	1	3281	2	1	1	1	1	0	1	1	1	0	0	1	0	0	0	1	0	0	1	0	1	0	1	1
48	1	39	3	2	177	69	22.0243	3	2	1	3917	3	2	1	0	1	0	1	1	1	1	1	1	0	0	1	0	0	1	0	0	1	0	1	4
49	1	18	1	2	158	45	18.026	3	2	1	4334	4	1	0	0	1	1	1	0	1	1	1	1	1	0	1	1	1	0	0	0	1	0	0	3
50	1	39	3	2	166	64	23.2254	3	2	1	3398	2	2	1	1	0	0	0	1	1	1	0	0	1	0	1	1	0	0	0	0	1	1	1	1
51	1	29	2	1	165	57	20.9366	4	3	1	3226	2	1	1	0	0	0	0	1	0	0	0	0	1	1	1	0	1	0	1	0	1	0	0	1
52	1	38	3	1	159	58	22.9421	2	2	1	3446	2	1	1	1	1	0	0	0	1	0	0	1	0	0	1	0	0	0	0	0	0	1	1	3
53	1	49	4	1	160	59	23.0469	2	2	1	3036	2	2	1	0	1	0	0	0	1	1	1	0	1	1	0	0	1	0	1	0	0	1	0	4
54	1	49	4	1	156	59	24.2439	3	2	1	3288	2	2	0	1	0	1	1	0	1	1	1	0	0	1	1	0	1	0	0	0	1	0	1	2
55	1	39	3	2	176	77	24.858	1	1	1	3832	3	2	0	0	1	1	1	0	1	0	1	0	1	0	0	0	1	0	0	0	0	1	0	2
56	1	49	4	1	156	67	27.5312	2	2	1	3158	2	2	0	0	1	0	1	1	1	0	0	0	0	0	1	0	1	1	0	0	0	1	0	1
57	1	49	4	2	158	66	26.4381	1	1	1	3350	2	2	0	1	1	1	0	0	0	1	0	0	1	0	1	1	0	1	1	0	0	0	0	2
58	1	35	3	1	173	79	26.3958	4	3	1	4219	4	2	1	1	1	1	0	1	0	1	1	1	0	1	1	0	0	0	0	0	1	0	1	2
59	1	29	2	1	166	74	26.8544	4	3	1	3557	3	1	0	1	1	1	0	1	1	0	1	0	0	1	0	0	1	1	1	0	1	1	0	4
60	1	40	3	1	171	65	22.2291	3	2	1	3909	3	2	0	0	1	1	1	1	1	1	0	0	0	0	1	0	1	1	1	0	0	1	0	1
61	1	37	3	1	177	59	18.8324	3	2	1	4285	4	1	1	0	0	1	1	0	0	0	0	0	0	0	0	1	0	0	0	0	1	0	1	4
62	1	39	3	1	164	65	24.1672	3	2	1	3531	3	2	0	0	0	0	1	0	1	0	0	1	0	1	0	1	0	1	0	0	1	0	1	3
63	1	29	2	2	165	65	23.8751	4	3	1	3593	3	2	0	1	0	0	0	1	1	1	0	1	0	0	0	1	0	1	1	0	0	0	1	4
64	1	39	3	1	167	72	25.8166	4	3	1	3815	3	1	0	1	0	1	0	0	0	1	0	0	1	0	1	0	1	1	0	0	1	1	1	2
65	1	49	4	1	170	54	18.6851	1	1	1	4121	4	1	0	1	1	0	1	0	1	0	0	0	1	0	0	0	0	1	0	0	0	1	0	1
66	1	39	3	1	170	57	19.7232	4	3	1	3761	3	2	0	0	0	0	1	1	1	1	1	0	0	1	0	1	0	1	1	0	1	1	0	4
67	1	29	2	1	176	60	19.3698	4	3	1	4066	4	2	0	1	1	0	1	1	1	1	1	1	1	0	1	1	1	1	0	0	0	0	1	1
68	1	39	3	1	171	71	24.281	3	2	1	4347	4	2	1	1	0	0	1	0	1	0	1	1	1	1	1	0	1	0	0	1	1	1	0	1
69	1	49	4	1	161	63	24.3046	3	2	1	4281	4	2	1	0	0	0	0	0	0	1	1	1	0	1	1	0	0	0	0	1	1	0	1	4
70	1	18	1	1	176	88	28.4091	3	2	1	3653	3	1	1	0	1	0	0	1	1	1	1	0	0	1	1	1	1	1	0	0	1	1	1	1
71	1	18	2	2	172	73	24.6755	3	2	1	3346	2	1	1	0	0	0	0	0	1	1	1	1	1	1	0	0	0	0	1	0	0	1	0	2
72	1	35	3	1	170	67	23.1834	3	2	1	4333	4	2	1	0	1	1	0	1	0	0	0	0	1	0	0	1	1	1	1	0	1	1	1	2
73	1	37	3	1	173	71	23.7228	3	2	1	4088	4	2	1	1	1	0	0	0	0	1	0	0	1	1	0	1	0	0	1	0	1	1	0	4
74	1	30	2	1	178	62	19.5682	4	3	1	4390	4	2	1	1	1	0	1	1	1	1	0	0	1	1	1	0	0	0	0	1	1	1	#NULL!	2
75	1	29	2	1	176	70	22.5981	3	2	1	3902	3	1	0	1	0	1	0	1	1	1	1	1	1	1	1	1	0	1	0	0	0	1	0	4
76	1	49	4	2	157	63	25.5588	2	2	1	3478	2	2	0	1	0	0	1	0	0	0	1	1	1	0	0	0	1	0	1	0	0	1	0	4
77	1	18	2	2	156	67	27.5312	4	3	1	3261	2	1	0	0	0	1	0	0	0	1	1	0	0	1	1	1	1	1	0	0	1	1	1	1
78	1	30	2	1	167	64	22.9481	4	3	1	3512	3	2	0	1	1	0	0	0	1	1	1	0	0	0	0	0	1	1	0	0	0	0	0	3
79	1	39	3	1	156	55	22.6003	4	3	1	3550	3	2	0	1	0	1	1	1	1	0	1	0	0	1	0	0	1	0	0	0	1	0	1	2
80	1	46	4	1	157	63	25.5588	3	2	1	3128	2	1	0	0	1	0	1	1	0	1	0	1	1	1	1	1	1	0	1	0	0	1	1	2
81	1	46	4	1	176	66	21.3068	3	2	1	3287	2	1	1	1	1	0	0	0	0	0	1	1	0	1	1	0	1	0	1	0	0	0	1	2
82	1	49	4	1	159	54	21.3599	3	2	1	3193	2	2	1	0	1	1	1	0	1	1	0	0	0	1	1	1	1	1	0	0	0	0	0	1
83	1	49	4	1	168	52	18.424	2	2	1	3135	2	2	0	0	1	1	0	1	1	0	1	1	0	1	0	0	1	1	1	0	1	0	0	1
84	1	49	4	1	162	60	22.8624	1	1	1	3162	2	1	0	1	1	0	1	0	1	1	0	0	1	1	1	1	1	1	0	0	1	0	0	4
85	1	45	4	2	156	55	22.6003	2	2	1	4362	4	1	0	1	0	0	1	1	1	0	1	1	1	1	1	0	0	1	1	0	0	0	1	2
86	1	72	5	2	163	62	23.3355	2	2	1	3630	3	1	1	0	1	0	1	0	1	0	0	1	1	1	1	0	0	1	1	0	0	0	1	4
87	1	32	3	2	168	66	23.3844	4	3	1	4165	4	2	0	1	1	1	1	1	0	0	0	1	0	1	0	0	0	0	1	0	0	0	0	2
88	1	49	4	1	168	59	20.9042	2	2	1	3303	2	2	1	0	0	0	1	0	0	0	1	0	0	0	0	1	1	0	1	0	1	0	0	3
89	1	39	3	1	177	73	23.3011	2	2	1	3258	2	1	1	1	0	0	0	1	0	0	1	1	0	0	1	0	1	0	0	0	1	1	1	2
90	1	38	3	2	165	61	22.4059	4	3	1	4309	4	2	0	1	0	0	1	1	1	0	1	1	1	0	1	0	1	1	1	0	1	1	1	2
91	1	34	3	1	167	68	24.3824	3	2	1	3047	2	1	0	0	1	1	1	0	1	0	1	1	1	0	1	1	1	1	0	0	1	1	0	3
92	1	49	4	2	172	62	20.9573	3	2	1	3216	2	1	1	0	1	1	0	1	1	1	0	1	1	1	0	0	0	0	1	0	0	1	0	2
93	1	36	3	2	178	63	19.8839	3	2	1	4277	4	2	0	0	1	0	0	0	0	0	1	1	1	1	0	0	1	0	1	0	1	1	1	4
94	1	39	3	1	164	53	19.7055	3	2	1	3095	2	2	1	1	1	1	0	1	0	0	1	1	1	0	1	0	1	1	0	0	1	0	1	3
95	1	25	2	2	176	86	27.7634	3	2	1	4041	4	2	1	1	1	1	0	0	0	1	1	1	1	0	0	0	1	0	0	0	0	0	1	3
96	1	49	4	1	178	76	23.9869	3	2	1	3309	2	2	0	1	1	1	1	0	1	0	0	0	0	0	0	0	0	1	1	0	1	0	0	2
97	1	29	2	2	173	67	22.3863	3	2	1	3324	2	1	1	1	1	0	0	1	1	0	1	0	1	1	1	1	1	0	1	0	1	1	0	4
98	1	35	3	2	162	61	23.2434	3	2	1	4201	4	2	0	0	1	1	1	1	1	0	1	0	0	1	0	1	1	0	1	0	0	1	1	4
99	1	18	1	2	160	57	22.2656	3	2	1	3230	2	1	1	0	1	1	0	1	0	0	0	0	1	0	1	1	0	1	1	0	0	0	0	1
100	1	49	4	2	161	54	20.8325	3	2	1	3114	2	1	0	1	1	0	1	0	1	0	1	1	1	0	1	1	0	1	1	0	0	0	0	2
101	1	29	2	1	173	57	19.0451	1	1	1	3550	3	1	0	0	1	0	0	0	1	0	0	0	1	0	1	1	1	1	1	0	1	0	1	2
102	1	39	3	1	171	72	24.623	1	1	1	3501	3	1	0	0	1	1	1	0	0	1	1	0	1	0	1	1	0	1	0	0	1	0	0	4
103	1	36	3	1	163	55	20.7008	3	2	1	4334	4	1	1	0	0	1	0	1	1	1	1	1	1	1	0	0	1	0	0	0	1	1	0	4
104	1	46	4	1	178	82	25.8806	3	2	1	4269	4	1	0	1	0	1	0	0	0	0	0	0	1	0	0	1	1	0	1	0	0	0	0	3
105	1	34	3	1	176	63	20.3383	4	3	1	4257	4	1	1	1	0	1	0	1	0	1	1	1	1	1	0	1	0	0	1	0	1	0	1	1
106	1	29	2	1	161	65	25.0762	4	3	1	4484	4	1	1	1	0	1	0	1	1	0	0	1	1	0	0	0	1	0	0	0	1	0	0	3
107	1	36	3	1	176	65	20.984	1	1	1	4432	4	1	0	0	1	0	0	0	0	1	0	0	0	1	1	0	1	0	1	0	0	0	0	2
108	1	44	4	1	166	69	25.0399	2	2	1	4340	4	1	1	0	1	1	1	1	0	0	0	1	1	0	1	1	0	1	0	1	0	0	#NULL!	4
109	1	29	2	2	178	85	26.8274	4	3	1	3651	3	1	0	0	0	0	1	0	1	0	1	1	0	0	0	1	0	0	1	1	0	1	#NULL!	1
110	1	50	4	1	166	64	23.2254	2	2	1	4482	4	2	1	1	1	1	0	1	1	1	1	1	1	0	1	1	0	0	1	0	0	0	#NULL!	1
111	1	32	3	1	160	72	28.125	4	3	1	4258	4	2	1	1	1	1	0	1	1	1	1	0	0	0	0	1	0	0	0	1	0	1	#NULL!	3
112	1	35	3	1	166	71	25.7657	4	3	1	4398	4	2	1	0	1	1	1	1	0	1	1	0	0	1	1	0	0	0	1	1	1	1	#NULL!	1
113	1	76	1	2	166	64	23.2254	4	3	1	3731	3	1	0	1	0	0	1	0	0	1	0	0	0	0	1	0	0	0	1	0	0	0	#NULL!	3
114	1	45	4	2	161	67	25.8478	3	2	1	2527	1	1	1	1	1	1	1	1	0	0	0	1	0	1	1	1	0	1	1	1	0	0	0	1
115	1	39	3	1	174	72	23.7812	3	2	1	3813	3	1	1	0	1	0	0	0	0	1	1	0	1	1	1	1	1	1	0	0	0	0	1	2
116	1	50	4	1	157	59	23.9361	3	2	1	3621	3	1	0	0	1	0	1	1	1	1	1	0	1	1	1	0	1	1	0	0	1	0	0	3
117	1	47	4	2	163	67	25.2174	3	2	1	4029	4	2	1	1	1	1	1	0	0	0	0	0	1	1	0	0	1	0	1	0	0	1	1	4
118	1	33	3	2	171	71	24.281	3	2	1	4400	4	2	1	1	0	0	0	0	0	0	0	1	0	0	0	1	0	0	1	0	1	0	1	4
119	1	49	4	1	173	77	25.7276	3	2	1	3145	2	1	1	0	1	1	1	1	1	1	0	1	0	1	1	0	1	0	0	0	0	1	1	1
120	1	56	5	2	166	57	20.6852	3	2	1	3299	2	1	0	1	1	1	0	0	1	1	0	1	1	0	0	0	0	1	1	0	1	0	1	1
121	1	50	4	2	169	80	28.0102	1	1	1	3678	3	2	0	0	1	1	0	0	0	1	1	0	1	1	0	0	0	0	1	0	1	0	1	2
122	1	39	3	2	163	61	22.9591	1	1	1	3770	3	2	0	1	1	0	0	0	1	0	1	0	1	0	0	0	0	0	1	0	0	1	1	4
123	1	38	3	1	173	65	21.7181	3	2	1	4259	4	2	1	1	1	1	1	1	1	0	0	1	1	0	0	0	1	1	1	0	1	0	0	1
124	1	29	2	2	170	76	26.2976	3	2	1	3565	3	1	0	0	1	1	0	0	0	0	0	1	1	0	1	1	1	0	0	0	0	0	1	4
125	1	49	4	1	157	57	23.1247	3	2	1	4365	4	2	0	0	1	1	0	0	1	1	1	1	0	1	1	0	1	1	1	0	1	1	0	2
126	1	32	3	1	168	63	22.3214	3	2	1	4381	4	1	0	0	0	1	0	1	0	1	1	0	1	1	0	0	0	1	1	0	1	1	0	3
127	1	32	3	1	162	72	27.4348	4	3	1	4224	4	2	0	1	1	0	0	1	1	0	0	1	0	1	1	1	0	1	1	0	1	1	1	4
128	1	39	3	1	177	64	20.4284	3	2	1	3995	3	1	1	1	0	0	0	0	1	0	1	0	1	1	1	0	0	1	1	0	0	1	1	1
129	1	50	4	1	164	55	20.4491	2	2	1	3959	3	1	0	0	1	0	0	0	0	1	0	0	0	1	1	0	0	0	1	0	1	0	0	3
130	1	49	4	1	167	56	20.0796	3	2	1	3355	2	2	0	1	0	1	1	0	1	0	0	0	0	1	1	1	0	0	0	0	1	1	0	3
131	1	18	1	2	155	46	19.1467	3	2	1	3778	3	1	1	1	1	0	1	1	1	1	0	0	1	1	1	0	1	1	0	0	1	0	1	2
132	1	31	3	1	158	61	24.4352	2	2	1	2773	1	1	1	1	1	1	0	1	1	1	0	1	0	0	0	1	1	1	1	0	0	1	1	4
133	1	18	1	1	167	60	21.5139	3	2	1	3619	3	1	0	1	1	1	1	0	0	1	1	0	1	0	1	1	1	1	1	0	0	1	0	3
134	1	31	4	1	157	64	25.9645	2	2	1	2606	1	1	0	0	1	1	1	0	1	0	1	1	1	1	1	0	1	0	0	0	1	0	1	3
135	1	50	4	1	156	47	19.313	2	2	1	3772	3	1	0	0	1	0	0	0	0	0	0	1	0	1	1	1	0	0	0	0	0	0	1	4
136	1	29	2	1	177	74	23.6203	4	3	1	3635	3	1	1	0	1	1	0	0	0	0	0	1	1	1	0	0	0	1	1	0	1	1	0	1
137	1	29	2	1	165	66	24.2424	3	2	1	3329	2	1	1	0	0	0	0	1	0	1	0	1	0	0	0	1	0	1	1	0	1	1	0	4
138	1	49	4	1	164	73	27.1416	3	2	1	3424	2	2	0	0	1	0	0	0	1	1	1	1	0	1	0	0	0	0	0	0	1	1	0	1
139	1	40	3	1	163	62	23.3355	4	3	1	3956	3	2	0	0	0	0	1	1	0	1	0	0	0	1	1	0	0	0	0	0	1	1	0	2
140	1	40	3	1	169	72	25.2092	3	2	1	3912	3	2	1	1	0	0	1	0	1	1	1	0	0	1	0	0	0	0	0	0	0	0	1	3
141	1	18	1	1	170	53	18.3391	1	1	1	2599	1	1	0	1	0	1	1	0	1	1	1	1	0	0	0	0	0	1	1	0	0	1	1	2
142	1	50	4	1	168	66	23.3844	2	2	1	3627	3	2	0	1	1	1	1	1	1	0	1	0	1	0	0	0	1	1	1	0	1	1	0	1
143	1	17	1	1	168	65	23.03	3	2	1	2725	1	1	0	1	1	1	1	1	0	0	1	1	0	1	1	1	1	1	0	0	0	1	1	2
144	1	79	5	2	160	59	23.0469	2	2	1	3707	3	1	0	0	1	0	0	0	0	1	1	1	0	0	0	0	0	0	1	0	0	1	0	1
145	1	50	4	1	155	43	17.898	3	2	1	3551	3	1	0	0	1	1	0	1	0	1	1	1	0	0	1	1	1	0	0	0	1	1	0	4
146	1	50	4	1	157	61	24.7475	2	2	1	3692	3	1	0	0	1	1	0	0	0	0	1	0	0	1	1	1	0	1	1	0	1	0	0	4
147	1	39	3	1	175	74	24.1633	3	2	1	3880	3	2	1	1	1	0	1	0	0	1	1	0	0	0	1	0	0	1	1	0	0	0	1	2
148	1	27	2	1	162	68	25.9107	1	1	1	2753	1	1	0	1	1	1	0	0	1	1	1	1	0	0	0	0	0	0	0	0	0	0	0	2
149	1	29	2	1	174	72	23.7812	3	2	1	3133	2	1	0	0	1	0	0	1	1	0	1	0	1	1	0	1	1	1	1	0	1	0	1	3
150	1	50	4	1	164	68	25.2826	2	2	1	3878	3	2	1	1	1	0	0	1	1	1	0	1	1	1	1	0	0	0	0	0	0	0	0	4
151	1	49	4	1	163	48	18.0662	3	2	1	2613	1	1	0	1	1	0	1	0	0	0	1	1	0	1	1	0	0	1	0	0	0	0	0	1
152	1	50	4	1	170	76	26.2976	3	2	1	3870	3	2	0	1	1	0	1	0	1	0	0	0	0	1	0	0	0	1	1	0	1	1	0	2
153	1	31	3	1	158	45	18.026	2	2	1	2688	1	1	1	1	1	0	0	1	0	1	1	1	1	1	1	0	1	0	0	0	0	1	1	3
154	1	39	3	1	177	78	24.8971	1	1	1	3937	3	2	0	0	0	0	0	0	0	0	1	0	1	1	0	1	1	0	1	0	1	1	1	3
155	1	22	2	1	168	62	21.9671	4	3	1	2529	1	1	1	0	1	0	0	0	1	0	1	0	1	0	1	1	0	1	1	0	0	0	1	3
156	1	26	2	1	164	64	23.7954	4	3	1	2761	1	1	1	0	0	0	1	0	0	0	1	0	0	1	1	0	0	0	0	0	0	0	1	1
157	1	31	3	1	172	65	21.9713	3	2	1	2702	1	1	0	1	1	0	0	1	1	1	1	1	0	1	0	1	1	1	1	0	0	1	0	1
158	1	24	2	1	164	75	27.8852	4	3	1	2623	1	1	1	1	1	0	0	1	0	0	0	0	0	1	0	1	0	0	1	0	1	1	0	4
159	1	40	3	1	164	70	26.0262	3	2	1	3852	3	1	1	0	1	0	1	0	1	0	1	0	1	1	0	1	0	0	1	0	0	1	0	3
160	1	21	2	1	156	52	21.3675	4	3	1	2998	1	1	1	0	1	0	1	1	0	1	0	1	1	1	0	0	1	1	1	0	0	1	0	4
161	1	39	3	1	158	63	25.2363	1	1	1	3594	3	1	0	1	1	1	0	0	1	0	0	1	1	1	1	1	1	1	1	0	1	0	1	2
162	1	17	1	1	167	66	23.6652	1	1	1	2962	1	1	0	1	0	1	0	0	1	0	1	1	0	1	1	1	0	0	0	0	1	1	0	1
163	1	41	4	1	157	55	22.3133	3	2	1	2510	1	1	0	0	1	0	1	1	0	1	0	1	1	1	0	1	0	0	0	0	1	1	1	3
164	1	42	4	1	171	67	22.913	2	2	1	2944	1	1	1	1	1	0	1	1	0	0	0	0	0	1	1	1	1	0	1	0	1	1	1	1
165	1	38	3	1	160	59	23.0469	4	3	1	3403	2	2	1	0	0	0	0	1	0	0	1	0	0	0	0	0	0	0	1	0	0	0	0	1
166	1	26	2	1	160	51	19.9219	3	2	1	3365	2	2	1	0	0	1	0	1	0	0	1	1	0	0	0	1	1	0	0	0	0	1	0	4
167	1	18	1	1	165	65	23.8751	1	1	1	3012	2	1	0	1	1	1	0	0	0	0	1	1	0	1	1	1	0	0	0	0	1	0	0	2
168	1	39	3	1	170	67	23.1834	1	1	1	3287	2	2	0	0	0	0	0	0	1	0	1	1	1	1	1	0	0	1	1	0	1	1	1	1
169	1	26	2	1	168	62	21.9671	4	3	1	3305	2	1	1	0	0	0	0	1	1	1	1	1	1	0	1	0	1	0	0	0	0	0	0	4
170	1	34	3	1	164	66	24.539	4	3	1	2716	1	2	1	0	0	0	0	0	1	1	1	0	0	0	1	0	1	0	0	0	0	1	0	3
171	1	18	1	1	163	62	23.3355	4	3	1	3378	2	1	1	0	1	0	0	0	0	1	1	0	0	1	0	0	1	1	1	0	0	1	0	2
172	1	18	1	1	175	64	20.898	4	3	1	3387	2	1	1	1	1	1	0	0	0	1	1	0	1	1	0	0	1	1	1	0	0	0	1	2
173	1	39	3	1	175	68	22.2041	3	2	1	2886	1	2	1	1	1	1	0	0	1	0	0	1	1	1	1	1	0	1	0	0	0	0	1	1
174	1	49	4	1	168	69	24.4473	1	1	1	3182	2	1	0	0	1	1	1	0	1	1	1	1	1	0	1	1	1	1	0	0	1	0	1	3
175	1	39	3	1	177	65	20.7476	1	1	1	3016	2	1	0	1	1	0	1	0	1	0	0	1	0	1	0	1	0	1	0	0	0	1	0	1
176	1	39	3	1	174	56	18.4965	3	2	1	3841	3	1	1	0	1	0	0	0	1	1	1	0	1	1	0	1	1	1	1	0	0	1	0	3
177	1	75	5	2	161	61	23.533	1	1	1	3757	3	1	0	1	1	0	1	0	0	1	0	0	0	1	1	0	0	0	0	0	1	0	0	3
178	1	50	4	1	175	65	21.2245	1	1	1	3670	3	1	0	1	0	0	1	0	1	1	1	1	1	1	1	1	0	0	0	0	0	1	0	4
179	1	39	3	1	157	62	25.1532	4	3	1	3552	3	1	0	0	1	1	0	0	1	1	1	0	1	1	0	1	0	1	0	0	0	0	0	3
180	1	39	3	1	173	79	26.3958	4	3	1	3804	3	1	1	1	0	0	1	1	1	1	0	1	1	1	1	1	0	0	0	0	0	0	0	2
181	1	41	4	2	161	59	22.7615	2	2	1	2763	1	2	0	0	1	0	1	1	0	1	0	0	1	1	1	0	0	0	1	0	0	1	1	4
182	1	50	4	1	170	67	23.1834	1	1	1	3535	3	1	0	1	1	1	0	0	0	1	0	0	1	1	1	1	0	0	1	0	0	0	1	3
183	1	50	4	1	159	67	26.5021	2	2	1	3712	3	1	1	1	0	1	1	0	0	0	1	1	0	1	1	0	0	1	0	0	1	1	1	4
184	1	41	4	2	170	72	24.9135	2	2	1	2715	1	2	1	1	1	1	1	1	1	0	1	1	0	0	0	0	1	0	1	0	0	0	0	2
185	1	49	4	1	158	65	26.0375	2	2	1	3084	2	2	0	0	1	0	0	1	0	1	0	0	1	0	1	1	0	1	1	0	1	0	1	2
186	1	17	1	2	161	67	25.8478	4	3	1	2786	1	1	0	1	1	0	0	0	0	0	0	0	1	0	1	1	0	1	1	0	0	0	0	4
187	1	39	3	1	157	59	23.9361	4	3	1	3343	2	2	0	0	1	1	0	1	1	0	0	1	0	0	1	1	1	1	1	0	1	1	1	4
188	1	49	4	1	161	64	24.6904	2	2	1	3107	2	2	1	1	1	1	1	0	1	0	0	1	1	1	0	0	0	0	1	0	1	0	1	4
189	1	54	5	2	163	51	19.1953	2	2	1	2543	1	1	0	0	1	1	1	0	1	0	0	1	0	1	0	1	1	1	1	0	1	0	0	4
190	1	20	2	2	158	56	22.4323	4	3	1	2573	1	1	1	0	1	0	1	1	0	1	0	0	0	0	0	0	0	0	1	0	0	0	0	2
191	1	18	1	2	173	66	22.0522	4	3	1	2665	1	1	1	1	1	1	1	0	0	0	1	1	1	1	1	1	1	0	1	0	1	1	1	2
192	1	28	2	1	171	75	25.6489	4	3	1	3835	3	1	0	0	1	0	1	0	1	0	0	1	1	0	1	0	0	1	1	0	0	0	1	1
193	1	29	2	1	164	68	25.2826	4	3	1	3515	3	1	0	1	1	0	1	1	1	0	1	0	1	0	0	0	1	0	0	0	1	1	0	4
194	1	29	2	1	168	72	25.5102	4	3	1	3546	3	1	0	0	0	1	1	1	0	1	1	1	0	0	1	1	0	0	0	0	0	1	1	1
195	1	76	1	1	170	75	25.9516	4	3	1	3983	3	1	0	0	0	0	1	1	1	1	1	0	0	0	1	0	1	0	1	0	1	0	0	3
196	1	50	4	1	160	53	20.7031	2	2	1	3946	3	1	1	1	1	1	1	0	0	0	0	1	0	1	0	1	0	0	1	0	1	0	1	1
197	1	29	2	1	166	62	22.4996	4	3	1	3665	3	1	1	1	1	1	1	0	0	1	1	1	1	1	0	1	1	0	1	0	0	1	1	1
198	1	50	4	1	163	57	21.4536	2	2	1	3683	3	1	1	0	1	0	0	0	1	1	1	0	1	1	1	0	1	1	1	0	1	1	0	1
199	1	50	4	1	166	54	19.5965	1	1	1	3723	3	1	0	0	0	0	0	0	1	1	1	1	1	0	1	1	1	0	0	0	0	0	1	1
200	1	18	1	1	168	72	25.5102	4	3	1	3718	3	1	0	0	1	1	0	0	1	0	1	0	1	1	0	0	0	0	0	0	0	1	1	2
201	1	29	2	1	168	58	20.5499	4	3	1	3745	3	1	0	1	1	1	1	0	0	0	1	1	1	0	0	0	1	0	0	0	0	0	1	2
202	1	76	1	1	158	65	26.0375	4	3	1	3707	3	1	0	0	1	0	0	1	0	1	0	1	0	0	0	1	0	0	1	0	0	1	0	2
203	1	39	3	1	168	54	19.1327	3	2	1	3573	3	1	1	1	1	1	1	1	1	1	1	0	1	1	0	1	1	1	1	0	0	0	0	3
204	1	50	4	1	158	53	21.2306	1	1	1	3965	3	1	0	1	0	0	1	0	1	0	1	0	0	0	1	1	1	0	1	0	1	0	1	3
205	1	30	2	1	169	71	24.8591	4	3	1	3921	3	1	1	0	0	1	0	0	0	1	0	1	0	0	0	0	1	0	1	0	1	0	1	4
206	1	39	3	1	158	66	26.4381	1	1	1	3723	3	1	0	0	1	0	0	0	1	1	1	0	1	1	1	1	0	0	0	0	1	1	0	3
207	1	79	3	1	156	49	20.1348	4	3	1	3610	3	1	1	0	1	1	0	0	0	1	0	1	1	1	1	1	1	1	1	0	0	0	0	4
208	1	39	3	1	157	58	23.5304	3	2	1	3936	3	1	0	0	1	1	1	0	1	0	0	1	1	0	1	0	0	0	1	0	0	1	1	3
209	1	50	4	1	155	58	24.1415	2	2	1	3654	3	1	0	1	1	0	1	1	0	0	1	0	1	1	0	1	1	0	1	0	0	0	0	3
210	1	29	2	1	176	62	20.0155	3	2	1	3547	3	1	0	1	1	1	0	1	0	0	1	1	1	0	0	1	1	1	1	0	1	0	0	3
211	1	39	3	1	172	64	21.6333	3	2	1	3990	3	1	0	1	1	1	1	1	1	1	0	0	0	0	0	1	1	1	1	0	0	0	0	1
212	1	39	3	1	159	56	22.151	3	2	1	3560	3	1	0	1	1	1	0	1	0	1	0	0	0	0	0	1	1	0	1	0	0	1	0	4
213	1	34	3	1	172	63	21.2953	3	2	1	3379	2	2	1	1	1	1	0	1	1	0	0	1	1	0	0	1	0	0	1	0	0	1	1	2
214	1	49	4	1	165	65	23.8751	3	2	1	3151	2	1	0	0	1	1	0	1	1	1	0	1	1	0	0	1	1	1	0	0	0	1	1	4
215	1	72	5	2	166	63	22.8625	3	2	1	3910	3	1	1	1	1	0	0	1	0	0	0	1	1	0	0	1	1	1	1	0	1	0	0	4
216	1	29	2	1	178	68	21.4619	4	3	1	3383	2	1	1	1	1	1	0	1	0	0	1	1	1	0	1	0	1	1	1	0	1	0	0	1
217	1	76	1	2	169	64	22.4082	1	1	1	3752	3	1	0	1	1	0	0	0	1	0	0	1	1	1	0	1	1	0	0	0	0	0	0	2
218	1	37	3	2	157	56	22.719	4	3	1	4280	4	2	1	0	1	1	1	0	0	1	0	1	0	0	0	0	1	1	1	0	0	0	0	2
219	1	44	4	1	173	74	24.7252	2	2	1	3233	2	1	1	1	1	0	1	0	1	0	0	0	0	0	0	1	1	0	0	0	1	1	0	3
220	1	29	2	1	175	73	23.8367	3	2	1	3167	2	1	1	0	1	0	1	1	0	0	0	0	0	0	0	1	1	1	0	0	0	1	1	1
221	1	38	3	1	175	63	20.5714	1	1	1	3387	2	2	1	0	0	0	1	1	1	1	1	0	0	0	0	0	1	1	0	0	0	1	0	3
222	1	38	3	2	166	61	22.1367	4	3	1	4079	4	1	1	1	0	1	0	0	1	0	1	0	0	0	0	0	1	0	1	0	0	0	1	3
223	1	49	4	1	170	64	22.1453	2	2	1	3200	2	1	1	0	1	0	0	0	0	1	0	0	0	1	0	0	0	0	0	0	0	0	0	1
224	1	76	1	2	160	67	26.1719	4	3	1	3940	3	1	0	0	0	1	1	0	1	1	0	0	0	0	0	0	0	0	1	0	1	1	1	1
225	1	32	3	2	174	72	23.7812	4	3	1	4236	4	2	0	0	1	0	0	0	1	1	0	1	0	1	1	1	0	0	0	0	1	0	1	1
226	1	76	1	2	156	63	25.8876	4	3	1	3842	3	1	0	1	1	1	1	1	1	1	0	1	1	1	1	1	0	1	1	0	1	1	1	3
227	1	18	1	2	163	71	26.7229	2	2	1	4140	4	1	0	0	1	1	0	1	0	0	1	1	1	1	0	1	0	0	0	0	0	1	1	3
228	1	40	3	1	169	80	28.0102	2	2	1	3235	2	1	1	1	1	1	0	1	1	0	0	0	1	1	0	1	0	1	0	0	1	0	1	2
229	1	34	3	2	171	67	22.913	4	3	1	4181	4	1	0	0	1	1	1	1	0	0	1	1	1	0	1	1	1	1	1	0	0	1	0	1
230	1	49	4	1	163	72	27.0993	2	2	1	3025	2	1	1	1	1	1	1	0	1	1	0	1	0	1	0	1	1	1	1	0	0	1	0	1
231	1	18	1	1	164	66	24.539	4	3	1	3084	2	1	1	0	1	1	1	1	1	1	1	0	0	0	1	1	1	1	1	0	1	1	0	1
232	1	44	4	1	159	56	22.151	1	1	1	3446	2	2	1	0	1	1	0	0	0	1	1	0	0	0	1	0	0	0	0	0	0	0	0	3
233	1	19	2	2	153	65	27.7671	1	1	1	3164	2	1	0	0	1	1	1	0	0	1	0	1	0	1	1	0	1	1	0	0	0	1	1	1
234	1	39	3	1	157	45	18.2563	4	3	1	3784	3	1	1	1	1	1	1	1	1	1	1	0	0	1	1	1	1	1	0	0	1	0	1	2
235	1	49	4	2	165	67	24.6097	2	2	1	3384	2	2	1	0	1	0	1	0	1	1	0	1	1	1	0	1	0	0	1	0	0	1	0	3
236	1	46	4	2	168	76	26.9274	2	2	1	4050	4	2	1	1	1	1	0	1	1	1	1	0	1	0	1	1	0	0	1	0	1	1	0	1
237	1	50	4	1	163	60	22.5827	2	2	1	3872	3	1	0	0	1	1	1	1	1	0	1	1	0	1	0	1	0	1	1	0	1	0	0	1
238	1	39	3	1	168	64	22.6757	4	3	1	3932	3	1	0	1	1	0	0	1	0	0	1	1	0	0	0	1	0	1	1	0	0	0	1	4
239	1	40	3	1	168	52	18.424	1	1	1	3783	3	1	0	1	1	1	1	0	1	0	0	0	1	0	0	1	1	1	0	0	0	0	0	2
240	1	50	4	1	177	86	27.4506	2	2	1	3792	3	2	1	0	1	1	0	0	0	1	1	1	1	1	1	0	1	0	1	0	1	1	1	3
241	1	39	3	1	175	71	23.1837	3	2	1	3759	3	1	0	0	1	1	1	1	0	1	0	0	0	1	0	1	0	1	0	0	0	0	0	4
242	1	39	3	1	177	75	23.9395	3	2	1	3988	3	1	1	0	1	0	1	1	1	0	0	0	0	0	0	0	0	1	0	0	0	1	1	3
243	1	72	5	2	178	86	27.143	2	2	1	3643	3	1	1	1	1	0	1	0	1	0	1	0	0	0	0	1	1	1	1	0	0	0	0	3
244	1	56	5	2	169	79	27.6601	2	2	1	3228	2	1	1	0	1	0	1	0	1	1	0	1	1	1	1	0	1	1	1	0	1	0	1	3
245	1	42	4	2	174	79	26.0933	2	2	1	4129	4	2	0	0	1	1	0	1	0	0	1	0	0	1	1	0	0	1	1	0	0	0	1	2
246	1	49	4	2	159	65	25.711	2	2	1	3292	2	2	1	1	1	1	0	1	0	1	1	0	1	0	1	1	0	0	1	0	1	1	1	4
247	1	49	4	2	177	76	24.2587	1	1	1	3012	2	2	0	1	1	1	0	0	1	1	0	0	1	0	0	1	0	0	1	0	1	1	1	2
248	1	76	1	1	163	65	24.4646	4	3	1	3627	3	1	0	1	1	0	1	0	0	1	1	0	1	0	0	1	1	0	1	0	0	1	0	2
249	1	48	4	2	160	62	24.2188	2	2	1	4053	4	2	1	1	1	0	1	1	0	0	1	0	0	1	0	1	0	0	1	0	0	1	1	4
250	1	39	3	1	158	66	26.4381	2	2	1	3122	2	1	1	1	1	0	0	1	0	1	1	1	0	1	1	0	0	0	0	0	1	1	1	1
251	1	38	3	2	174	65	21.4692	4	3	1	3334	2	2	1	1	1	0	0	0	1	1	0	1	0	0	1	1	0	1	1	0	1	0	1	1
252	1	49	4	2	178	81	25.565	2	2	1	3165	2	2	1	0	1	0	1	0	1	1	0	1	0	0	0	0	1	0	1	0	1	1	1	3
253	1	47	4	1	178	76	23.9869	2	2	1	3060	2	2	0	0	1	0	1	1	1	1	1	0	1	0	0	0	0	0	1	0	1	0	0	4
254	1	39	3	2	178	69	21.7776	4	3	1	3840	3	2	1	1	0	1	1	1	0	0	1	1	0	1	0	0	1	1	1	0	0	0	0	4
255	1	18	1	2	173	56	18.7109	4	3	1	3726	3	1	0	1	1	0	0	1	1	0	0	1	0	1	1	0	1	0	1	0	1	1	1	1
256	1	39	3	1	160	46	17.9688	1	1	1	3005	2	2	0	0	0	1	1	1	1	1	1	1	0	1	1	0	1	1	1	0	0	0	1	3
257	1	50	4	1	178	90	28.4055	2	2	1	3399	2	2	0	1	0	0	1	0	1	1	0	1	0	1	0	1	1	0	1	0	0	0	1	1
258	1	49	4	2	162	62	23.6244	1	1	1	3386	2	1	0	0	0	0	0	0	1	0	1	1	0	1	0	0	0	0	1	0	1	0	1	3
259	1	39	3	2	171	59	20.1771	2	2	1	3173	2	1	1	0	1	0	1	1	0	1	0	0	0	1	0	1	0	0	0	0	0	0	1	4
260	1	46	4	1	167	67	24.0238	2	2	1	3029	2	1	0	0	1	0	0	1	0	1	1	0	0	0	1	0	1	1	0	0	0	1	1	3
261	1	49	4	1	178	73	23.04	2	2	1	3323	2	2	0	0	1	1	1	1	1	1	1	0	0	1	0	1	0	1	1	0	1	0	1	4
262	1	34	3	2	159	71	28.0843	2	2	1	4304	4	1	1	1	1	1	0	1	0	0	0	1	0	0	1	0	0	1	0	0	0	1	0	1
263	1	18	1	2	172	78	26.3656	4	3	1	3275	2	1	1	1	1	1	0	0	0	0	0	0	1	0	1	1	1	0	1	0	1	1	1	4
264	1	39	3	2	158	66	26.4381	2	2	1	3219	2	1	0	0	1	0	1	1	0	1	0	1	1	1	1	0	1	0	0	0	1	0	0	4
265	1	38	3	1	164	70	26.0262	4	3	1	3446	2	2	1	1	1	0	0	1	1	1	0	1	0	0	0	0	1	0	0	0	0	0	1	2
266	1	18	1	1	155	56	23.3091	1	1	1	3085	2	1	0	1	1	1	0	0	0	0	1	0	0	1	1	1	1	0	1	0	1	1	0	4
267	1	39	3	1	164	63	23.4236	1	1	1	3081	2	2	1	0	1	0	0	1	1	1	1	1	1	0	1	0	0	0	1	0	1	1	0	2
268	1	18	1	2	176	67	21.6296	4	3	2	3247	2	1	0	1	1	0	1	1	1	1	1	1	0	1	0	1	1	1	1	0	0	0	1	1
269	1	38	3	2	178	80	25.2493	1	1	2	3217	2	1	0	0	1	0	1	0	0	1	0	0	0	1	0	0	0	1	1	0	1	1	0	4
270	1	29	2	1	157	66	26.7759	1	1	2	3474	2	2	0	1	1	1	1	0	0	0	0	1	0	0	1	1	0	0	0	0	1	0	1	3
271	1	56	5	2	163	72	27.0993	2	2	2	3054	2	1	0	0	1	1	1	0	1	1	0	1	1	1	0	0	1	1	1	0	0	1	0	1
272	1	26	2	2	156	57	23.4221	4	3	2	3173	2	1	1	1	1	1	1	0	0	0	1	1	1	1	1	0	0	0	0	0	1	1	0	1
273	1	39	3	2	156	47	19.313	2	2	2	3338	2	1	1	1	1	1	1	1	0	0	0	0	1	1	1	0	0	0	0	0	0	1	1	2
274	1	39	3	2	168	57	20.1956	4	3	2	3751	3	2	1	0	1	0	0	0	0	0	1	0	0	0	1	0	1	0	0	0	0	1	1	1
275	1	50	4	2	162	53	20.1951	1	1	2	3771	3	1	0	1	1	0	0	0	0	1	1	0	0	0	1	0	1	0	1	0	1	0	0	4
276	1	72	5	2	164	63	23.4236	2	2	2	3907	3	1	0	1	1	0	0	1	0	1	1	1	1	1	1	1	0	1	1	0	0	0	1	2
277	1	50	4	2	177	85	27.1314	2	2	2	3644	3	1	1	1	1	0	0	1	0	1	1	1	0	1	0	0	0	0	1	0	1	1	1	4
278	1	43	4	2	158	53	21.2306	2	2	2	4328	4	1	1	0	1	1	1	0	1	0	0	0	1	0	1	0	1	0	1	0	1	0	0	4
279	1	29	2	2	177	87	27.7698	4	3	2	4469	4	1	1	0	1	0	0	1	1	0	0	1	1	0	0	1	0	1	0	0	0	0	1	1
280	1	38	3	2	178	66	20.8307	1	1	2	4159	4	1	0	1	1	0	1	0	1	1	0	1	0	1	1	0	0	0	1	0	0	1	1	2
281	1	28	2	2	171	61	20.8611	4	3	2	4208	4	2	1	0	1	1	0	1	0	0	0	0	1	1	1	1	1	0	1	0	0	1	0	2
282	1	37	3	2	160	56	21.875	2	2	2	4000	4	1	0	1	1	0	1	1	0	1	0	1	0	0	0	1	0	0	1	0	0	0	1	2
283	1	75	5	2	178	81	25.565	1	1	2	3760	3	1	0	0	1	1	0	0	1	1	1	0	0	1	1	1	0	0	0	0	0	0	1	3
284	1	39	3	2	173	72	24.0569	4	3	2	3904	3	2	0	0	1	1	0	1	1	0	0	1	1	1	1	0	0	1	1	0	1	0	1	4
285	1	33	3	2	168	59	20.9042	3	2	2	4462	4	2	1	0	1	0	0	0	1	1	1	0	1	1	1	0	0	0	0	0	1	1	0	1
286	1	75	5	2	156	53	21.7784	3	2	2	3516	3	1	0	0	1	0	1	0	1	1	0	0	1	1	0	0	0	0	0	0	1	0	1	4
287	1	39	3	2	164	70	26.0262	1	1	2	4071	4	1	0	1	1	1	1	0	0	1	1	1	1	0	1	1	0	1	0	0	1	1	0	4
288	1	28	2	1	178	83	26.1962	4	3	2	3624	3	1	0	0	1	0	0	0	1	0	1	0	1	1	1	1	1	0	1	0	0	0	1	2
289	1	79	3	1	157	63	25.5588	4	3	2	3699	3	2	1	1	1	0	0	0	0	0	1	1	1	0	0	0	1	1	1	0	1	1	1	4
290	1	39	3	1	169	57	19.9573	3	2	2	3997	3	2	1	1	1	0	0	1	1	0	0	0	0	1	0	0	0	0	1	0	1	1	1	3
291	1	29	2	1	167	54	19.3625	1	1	2	3520	3	2	0	1	0	0	1	0	1	0	0	1	1	0	0	0	1	1	0	0	1	1	0	2
292	1	29	2	1	168	62	21.9671	3	2	2	3984	3	1	0	1	0	0	0	0	1	0	1	1	0	0	0	1	1	0	0	0	1	0	0	4
293	1	39	3	1	177	79	25.2163	3	2	2	3640	3	1	1	0	0	1	1	1	1	0	0	1	1	0	0	1	0	0	0	0	1	0	1	2
294	1	29	2	1	159	71	28.0843	4	3	2	3683	3	1	0	1	0	0	1	1	1	1	0	0	1	1	1	0	1	1	1	0	1	1	0	2
295	1	29	2	1	177	64	20.4284	4	3	2	3870	3	2	1	0	1	0	1	0	0	1	1	1	0	0	1	1	1	0	0	0	1	0	1	4
296	1	50	4	1	162	55	20.9572	2	2	2	3821	3	1	1	1	1	1	1	0	1	0	1	0	1	0	0	0	0	0	1	0	0	0	0	2
297	1	18	1	1	161	59	22.7615	4	3	2	3955	3	1	0	0	0	1	0	0	1	1	1	0	1	0	0	1	0	0	0	0	0	0	0	2
298	1	34	3	1	157	63	25.5588	4	3	2	4187	4	2	0	0	0	0	1	1	1	0	0	1	1	0	0	0	0	0	0	0	1	1	0	1
299	1	29	2	1	160	52	20.3125	4	3	2	4048	4	2	1	1	0	0	0	0	0	0	1	1	1	0	1	1	1	0	0	0	0	0	1	4
300	1	75	5	2	175	58	18.9388	2	2	2	3787	3	1	1	1	0	1	0	1	1	0	0	1	1	1	0	0	1	0	0	0	0	1	0	2
301	1	34	3	1	166	53	19.2336	4	3	2	4337	4	2	1	0	1	0	0	0	1	0	0	1	0	0	0	1	1	0	1	0	1	1	1	1
302	1	30	2	1	175	62	20.2449	4	3	2	3896	3	1	0	0	1	1	0	1	0	1	0	0	0	0	0	0	1	1	0	0	1	1	0	2
303	1	50	4	1	157	56	22.719	2	2	2	3612	3	2	0	0	1	1	1	0	0	0	0	1	0	1	1	0	0	1	1	0	0	1	0	1
304	1	34	3	1	162	48	18.2899	1	1	2	4094	4	2	0	0	1	1	0	0	1	0	1	0	0	0	1	1	1	0	1	0	1	0	0	2
305	1	79	3	1	161	56	21.6041	4	3	2	3791	3	2	0	0	1	1	1	1	0	0	1	0	1	1	0	0	1	1	0	0	0	0	1	3
306	1	18	1	1	168	60	21.2585	4	3	2	3586	3	1	1	1	0	0	0	0	1	0	1	1	1	0	0	0	1	0	0	0	0	1	0	2
307	1	39	3	2	166	71	25.7657	2	2	2	3651	3	1	1	1	0	1	1	0	1	0	0	1	1	1	0	1	0	1	1	0	1	0	1	3
308	1	37	3	1	158	58	23.2335	4	3	2	4038	4	2	1	1	1	0	0	1	0	1	0	1	1	1	1	1	1	1	0	0	1	0	1	1
309	1	29	2	1	174	81	26.7539	4	3	2	4404	4	2	0	1	0	1	1	0	1	0	1	0	0	0	0	1	0	1	0	0	1	1	1	1
310	1	34	3	1	156	65	26.7094	1	1	2	4019	4	2	0	0	1	0	0	0	0	0	0	0	0	0	0	0	1	1	1	0	0	1	0	2
311	1	29	2	1	165	54	19.8347	4	3	2	4158	4	2	1	1	1	0	0	0	0	0	0	0	0	1	1	0	0	0	0	0	0	1	0	4
312	1	37	3	1	166	72	26.1286	4	3	2	4045	4	2	0	0	1	1	1	1	1	1	1	0	1	1	0	1	1	0	1	0	1	0	1	3
313	1	39	3	2	173	62	20.7157	4	3	2	3536	3	2	1	1	0	1	0	1	0	1	1	0	1	0	1	0	0	1	1	0	0	0	1	1
314	1	39	3	2	167	75	26.8923	1	1	2	3594	3	2	0	0	1	0	0	0	1	1	0	1	1	0	0	1	1	1	1	0	1	0	1	4
315	1	39	3	2	176	77	24.858	1	1	2	3865	3	2	0	1	0	1	0	1	1	0	0	1	0	0	1	0	1	1	1	0	0	1	0	2
316	1	50	4	1	162	53	20.1951	1	1	2	3963	3	1	1	0	1	1	0	1	1	0	0	1	1	0	1	1	0	0	0	0	1	0	1	2
317	1	39	3	1	159	47	18.591	3	2	2	3767	3	2	0	0	1	1	0	1	1	0	1	1	0	1	0	0	0	0	0	0	1	1	1	2
318	1	39	3	2	174	82	27.0842	4	3	2	3781	3	2	0	1	1	0	1	0	1	1	1	0	0	1	1	1	1	0	1	0	0	0	0	1
319	1	39	3	1	174	70	23.1206	4	3	2	3632	3	1	1	1	1	0	0	1	1	1	1	1	0	1	0	1	0	1	1	0	0	0	0	4
320	1	47	4	1	161	61	23.533	2	2	2	4139	4	1	1	0	0	0	1	1	0	1	1	0	0	0	1	0	0	0	0	0	1	0	0	2
321	1	40	4	1	175	80	26.1224	2	2	2	4204	4	2	1	0	1	1	0	1	0	1	1	1	0	0	1	1	1	0	0	0	1	0	0	1
322	1	50	4	1	168	57	20.1956	2	2	2	3723	3	2	0	0	0	0	1	1	1	0	1	0	1	1	0	0	0	0	0	0	1	0	1	2
323	1	36	3	1	163	66	24.841	4	3	2	4122	4	2	1	1	1	1	0	1	0	0	0	0	0	1	0	0	0	0	0	0	1	0	0	1
324	1	29	2	2	177	85	27.1314	4	3	2	3769	3	2	1	0	0	1	1	1	1	0	0	0	1	1	1	1	0	1	1	0	0	0	0	1
325	1	39	3	2	158	64	25.6369	4	3	2	3926	3	2	1	0	1	1	0	1	1	1	1	0	0	1	0	1	1	0	1	0	1	1	0	3
326	1	39	3	1	171	76	25.9909	4	3	2	4317	4	2	0	0	1	1	0	0	0	0	1	0	0	0	1	1	0	1	0	0	0	1	1	4
327	1	50	4	2	170	56	19.3772	2	2	2	3600	3	2	0	1	1	0	0	1	1	1	1	1	0	1	0	1	1	0	1	0	0	1	1	1
328	1	39	3	1	159	55	21.7555	1	1	2	4061	4	2	0	1	0	1	1	0	0	0	1	1	1	1	0	1	1	0	0	0	0	1	0	1
329	1	19	2	1	158	63	25.2363	3	2	2	4157	4	1	1	0	0	1	0	1	0	1	0	0	1	1	0	0	1	1	0	0	1	1	1	3
330	1	48	4	1	174	67	22.1297	3	2	2	4199	4	1	0	0	1	1	1	1	1	0	0	1	0	0	1	1	0	0	1	0	1	1	0	2
331	1	39	3	1	174	72	23.7812	1	1	2	4414	4	2	0	0	0	1	1	0	1	1	1	0	0	1	0	1	1	0	1	0	1	0	1	1
332	1	50	4	2	178	64	20.1995	3	2	2	3070	2	2	1	1	1	1	0	0	1	1	0	0	0	0	1	1	0	0	1	0	0	0	0	4
333	1	36	3	2	159	61	24.1288	3	2	2	3270	2	2	1	1	0	1	1	1	1	0	0	1	0	0	1	1	0	0	1	0	0	1	1	3
334	1	39	3	2	162	59	22.4813	4	3	2	3032	2	2	0	0	0	1	1	0	0	1	1	0	0	1	1	0	0	1	1	0	0	1	0	1
335	1	49	4	2	174	85	28.075	3	2	2	3329	2	2	0	1	1	0	1	0	1	0	0	1	1	1	1	1	1	1	1	0	0	1	0	2
336	1	76	1	1	168	53	18.7783	4	3	2	3624	3	1	1	0	1	1	0	0	1	0	1	1	1	1	1	0	0	1	1	0	1	1	1	1
337	1	29	2	1	177	81	25.8546	4	3	2	3995	3	2	0	0	0	0	1	0	0	1	0	1	1	0	0	1	0	1	1	0	1	0	1	3
338	1	39	3	2	173	72	24.0569	2	2	2	3513	3	1	1	0	0	0	0	1	1	1	1	1	0	1	0	1	0	1	1	0	1	1	1	2
339	1	39	3	1	166	66	23.9512	3	2	2	3509	3	1	1	1	1	0	0	1	1	0	0	1	0	1	1	0	1	0	0	0	1	0	1	3
340	1	29	2	1	158	51	20.4294	4	3	2	3830	3	2	1	0	1	1	0	0	1	0	1	1	0	0	0	0	0	0	1	0	1	1	0	4
341	1	39	3	1	160	57	22.2656	3	2	2	3927	3	1	0	0	1	0	0	1	1	0	1	0	1	0	1	0	1	0	0	0	0	0	0	3
342	1	39	3	2	158	47	18.8271	3	2	2	3543	3	1	1	0	0	0	0	0	1	1	1	1	1	1	1	0	1	0	1	0	1	0	1	1
343	1	50	4	1	178	62	19.5682	3	2	2	3935	3	1	1	0	1	1	0	0	1	1	0	0	1	0	1	1	0	0	1	0	1	1	0	4
344	1	42	4	1	158	62	24.8358	2	2	2	4126	4	2	1	0	0	0	0	0	0	0	1	0	0	0	0	0	1	0	0	0	0	0	1	4
345	1	39	3	2	164	63	23.4236	4	3	2	3837	3	2	0	0	1	0	1	1	0	1	1	0	0	0	1	1	0	1	1	0	0	0	0	1
346	1	30	3	1	170	61	21.1073	1	1	2	4414	4	1	0	1	1	1	1	0	0	0	1	1	1	1	0	0	0	0	0	1	1	1	1	1
347	1	79	3	1	172	71	23.9995	4	3	2	3956	3	2	1	1	0	0	0	0	0	1	0	0	1	0	0	1	0	0	1	1	0	1	1	2
348	1	39	3	1	178	69	21.7776	4	3	2	3683	3	2	1	1	1	0	0	0	1	0	1	1	1	1	0	0	1	0	0	0	1	1	0	2
349	1	33	3	1	162	62	23.6244	4	3	2	4157	4	1	1	1	1	0	1	0	1	1	0	0	0	0	1	0	0	0	1	1	0	0	1	1
350	1	34	3	1	169	60	21.0077	1	1	2	4322	4	2	0	1	0	1	0	0	1	1	0	1	0	0	1	0	0	0	0	1	0	0	0	4
351	1	39	3	1	161	63	24.3046	4	3	2	3754	3	2	1	1	1	1	1	1	0	1	0	0	1	0	0	0	1	0	1	1	0	0	0	3
352	1	39	3	1	170	65	22.4913	1	1	2	3718	3	1	1	1	1	1	1	1	0	1	0	1	0	1	0	1	0	1	0	1	1	1	#NULL!	4
353	1	79	3	1	170	70	24.2215	4	3	2	3713	3	1	1	1	1	0	0	1	0	0	1	0	0	0	1	1	1	1	0	0	0	1	#NULL!	3
354	1	76	1	1	168	80	28.3447	4	3	2	3764	3	1	1	0	1	1	1	1	1	0	0	1	1	0	0	1	0	0	1	1	0	0	#NULL!	3
355	1	39	3	1	168	80	28.3447	1	1	2	3964	3	2	1	0	1	0	1	1	1	0	1	1	1	0	1	1	0	1	1	0	0	0	#NULL!	1
356	1	29	2	1	161	50	19.2894	4	3	2	3769	3	1	1	0	1	0	0	1	0	0	0	1	1	0	1	0	1	0	0	0	0	0	#NULL!	2
357	1	50	4	1	157	65	26.3702	2	2	2	3730	3	1	1	1	1	1	1	1	0	0	1	1	0	1	0	1	1	0	1	0	1	1	#NULL!	2
358	1	50	4	1	164	74	27.5134	2	2	2	3519	3	1	1	0	1	0	0	1	1	1	1	1	1	1	1	0	1	0	1	1	1	1	#NULL!	4
359	1	39	3	2	163	65	24.4646	4	3	2	3528	3	2	0	0	0	0	0	0	1	1	0	0	1	0	0	1	1	0	1	1	0	0	#NULL!	1
360	1	39	3	1	168	70	24.8016	1	1	2	4281	4	2	0	1	1	1	1	0	0	1	0	0	0	1	1	0	0	0	0	1	1	0	#NULL!	1
361	1	39	3	1	171	74	25.3069	4	3	2	3553	3	2	1	1	1	1	1	1	0	1	0	1	1	0	1	1	1	1	1	0	0	0	#NULL!	3
362	1	50	4	2	168	67	23.7387	2	2	2	3747	3	2	0	1	0	1	0	0	1	1	0	1	0	0	1	0	1	1	1	0	0	0	#NULL!	1
363	1	39	3	1	167	62	22.231	1	1	2	3821	3	2	0	0	0	1	1	0	0	1	1	0	0	0	1	1	0	0	0	0	0	0	1	2
364	1	39	3	2	164	64	23.7954	1	1	2	3890	3	1	0	0	0	1	0	0	1	1	0	1	1	1	1	0	0	0	1	0	1	1	0	2
365	1	79	3	1	157	69	27.993	4	3	2	3691	3	2	0	1	1	1	1	0	0	1	0	1	1	1	0	0	1	1	0	1	1	1	1	2
366	1	29	2	1	158	51	20.4294	3	2	2	3511	3	2	0	1	1	0	0	1	0	1	1	0	1	1	0	1	1	0	1	0	0	1	0	2
367	1	34	3	2	170	63	21.7993	1	1	2	2934	1	2	0	1	0	0	1	1	1	0	1	0	0	1	1	1	1	1	1	0	0	1	0	2
368	1	66	5	2	160	67	26.1719	2	2	2	3243	2	1	1	0	0	0	0	1	1	0	1	0	0	1	0	0	0	1	1	0	1	0	1	2
369	1	17	2	2	156	62	25.4767	4	3	2	4153	4	2	0	1	1	1	1	1	1	1	1	1	0	0	1	0	1	1	1	0	1	1	1	1
370	1	47	4	2	163	67	25.2174	3	2	2	4091	4	1	0	0	1	1	0	0	0	0	0	0	0	1	1	0	1	1	1	0	0	0	1	4
371	1	18	1	1	170	77	26.6436	4	3	2	3869	3	1	0	1	0	1	0	0	0	0	1	0	0	0	0	1	0	1	1	1	0	1	1	1
372	1	44	4	1	166	67	24.3141	1	1	2	2656	1	1	0	0	1	0	0	0	0	1	1	0	1	0	0	1	1	0	0	0	0	1	1	3
373	1	29	2	1	158	45	18.026	4	3	2	3673	3	2	1	1	1	0	1	1	1	1	1	1	0	1	1	1	1	1	1	0	1	1	1	2
374	1	18	1	2	164	62	23.0518	3	2	2	3182	2	1	0	0	1	0	0	0	1	0	0	1	1	1	1	0	0	0	1	0	1	0	0	4
375	1	39	3	1	167	57	20.4382	4	3	2	3943	3	2	1	0	0	1	0	0	0	0	1	1	1	1	1	0	0	1	0	1	1	1	0	1
376	1	40	3	1	166	50	18.1449	4	3	2	3655	3	2	0	0	0	0	0	1	1	1	1	0	0	0	1	1	0	0	0	0	0	1	1	4
377	1	19	2	1	153	56	23.9224	4	3	2	2751	1	1	0	1	1	0	0	1	0	0	1	0	1	0	1	0	0	1	1	0	0	1	1	1
378	1	32	3	2	172	78	26.3656	4	3	2	2843	1	2	1	1	1	1	1	1	0	1	0	0	1	1	0	0	0	1	1	0	1	1	0	1
379	1	40	3	1	168	63	22.3214	4	3	2	3699	3	2	1	1	1	0	0	1	0	0	1	0	0	1	1	1	0	1	0	0	1	1	1	1
380	1	49	4	1	163	58	21.83	1	1	2	3258	2	2	0	1	1	0	0	1	1	1	1	1	0	0	0	0	1	1	0	0	0	0	0	4
381	1	39	3	1	177	86	27.4506	3	2	2	3517	3	1	1	1	1	1	0	0	1	0	1	0	0	1	0	1	0	0	0	0	1	1	1	2
382	1	39	3	2	167	58	20.7967	4	3	3	3820	3	2	0	1	1	0	1	1	1	1	1	1	1	0	1	1	1	1	1	1	0	0	1	1
383	1	53	5	1	173	67	22.3863	2	2	3	2658	1	1	1	1	0	1	1	1	0	0	1	0	0	1	1	0	1	0	1	0	1	0	1	3
384	1	30	2	2	159	70	27.6888	3	2	3	3519	3	1	1	0	0	0	1	1	1	1	0	1	0	0	1	1	1	1	0	0	0	0	0	1
385	1	43	4	2	177	64	20.4284	3	2	3	3042	2	2	1	1	0	0	0	0	0	0	1	1	0	0	1	0	1	0	1	0	1	1	0	1
386	1	49	4	2	164	62	23.0518	1	1	3	3062	2	2	0	1	1	0	0	0	1	0	0	0	1	0	0	0	1	1	1	0	0	0	0	1
387	1	18	1	1	168	70	24.8016	4	3	3	3135	2	1	1	0	0	1	0	1	0	0	1	0	1	0	0	0	0	0	0	0	0	1	1	4
388	1	49	4	1	178	66	20.8307	2	2	3	3019	2	1	0	1	0	0	0	0	0	1	1	0	0	0	1	1	1	0	0	0	1	1	0	2
389	1	49	4	1	169	59	20.6575	3	2	3	3464	2	2	1	1	0	1	0	0	0	1	1	1	1	0	0	1	1	1	1	0	0	0	1	1
390	1	49	4	1	160	58	22.6562	1	1	3	3124	2	2	0	1	1	1	1	0	1	1	1	0	0	0	1	1	0	1	1	0	0	1	0	3
391	1	28	2	2	167	56	20.0796	3	2	3	3565	3	2	1	0	1	1	0	0	1	1	1	0	1	1	0	1	1	0	0	0	0	1	0	2
392	1	39	3	1	166	64	23.2254	4	3	3	3931	3	1	0	1	1	1	0	1	0	1	0	0	0	1	0	0	0	0	1	0	1	0	0	3
393	1	40	4	1	159	65	25.711	3	2	3	4078	4	1	1	1	0	1	0	0	1	1	1	1	1	0	1	1	0	1	1	0	0	1	1	1
394	1	39	3	2	157	66	26.7759	1	1	3	3559	3	2	0	0	0	1	0	0	1	1	0	0	0	0	0	0	0	1	1	0	0	1	#NULL!	2
395	1	50	4	1	165	61	22.4059	2	2	3	3383	2	2	1	1	1	0	1	1	0	0	1	1	1	1	0	0	0	0	1	0	1	0	1	3
396	1	32	3	1	178	59	18.6214	1	1	3	2631	1	1	0	0	1	1	0	0	1	1	0	0	1	0	1	0	0	0	1	0	0	0	0	3
397	1	40	3	2	175	67	21.8776	3	2	3	3836	3	1	0	0	0	0	0	1	1	1	0	1	1	1	1	0	1	1	1	0	1	0	0	2
398	1	49	4	1	171	56	19.1512	2	2	3	3301	2	2	1	1	0	0	1	1	0	1	0	0	0	1	0	0	0	1	0	0	0	1	0	4
399	1	39	3	1	164	63	23.4236	3	2	3	3122	2	1	1	0	1	1	1	0	1	0	1	0	1	0	1	1	1	1	1	0	1	1	1	4
400	1	48	4	1	171	60	20.5191	2	2	3	3324	2	2	1	0	0	0	1	0	1	0	0	1	0	1	0	1	1	1	1	0	0	0	0	2
401	1	50	4	2	175	55	17.9592	2	2	3	3789	3	2	1	1	0	1	0	0	1	1	1	0	0	1	0	0	1	1	1	0	0	1	1	3
402	1	50	4	2	176	81	26.1493	3	2	3	3662	3	2	0	1	1	0	1	1	0	1	0	1	1	0	1	0	1	1	1	0	0	1	1	4
403	1	38	3	1	160	60	23.4375	1	1	3	3077	2	1	0	0	1	1	0	0	1	1	1	0	0	1	0	0	0	0	0	0	1	0	1	1
404	1	18	1	2	155	48	19.9792	1	1	3	3496	2	1	0	1	1	1	1	0	1	1	1	0	0	0	0	0	0	1	0	0	0	0	0	2
405	1	50	4	2	162	64	24.3865	3	2	3	3854	3	1	0	1	0	1	0	1	0	0	0	1	1	1	0	0	0	1	1	0	0	0	0	2
406	1	40	4	1	156	63	25.8876	3	2	3	4297	4	2	1	1	1	1	0	1	0	1	0	0	1	1	1	0	1	1	1	0	1	0	#NULL!	1
407	1	47	4	1	178	82	25.8806	3	2	3	4269	4	2	1	1	1	0	1	1	1	0	1	1	0	1	0	0	0	0	0	1	1	0	#NULL!	1
408	1	26	2	2	161	47	18.132	4	3	3	3956	3	1	1	0	0	0	1	0	1	0	0	1	0	1	0	1	1	1	1	0	0	0	0	2
409	1	39	3	1	158	62	24.8358	3	2	3	3568	3	1	1	0	1	1	1	1	0	1	0	0	0	1	0	1	1	0	0	0	0	1	0	1
410	1	53	5	1	160	61	23.8281	2	2	3	2765	1	1	0	0	1	1	0	1	1	0	1	0	0	0	0	0	1	1	0	0	0	0	0	4
411	1	29	2	1	160	61	23.8281	4	3	3	3370	2	2	0	1	0	0	0	0	1	1	1	1	1	1	1	0	1	0	0	0	1	1	0	1
412	1	18	2	1	158	67	26.8386	1	1	3	3019	2	1	0	0	0	0	0	0	1	0	1	0	1	1	1	0	1	1	0	0	0	1	0	2
413	1	39	3	1	163	73	27.4756	1	1	3	2856	1	2	1	1	0	0	0	1	0	0	1	1	1	1	1	0	0	0	1	0	0	0	0	2
414	1	41	4	2	173	83	27.7323	2	2	3	2909	1	2	1	1	1	0	1	0	1	0	0	1	0	1	0	0	0	0	1	0	1	1	1	4
415	1	29	2	1	170	59	20.4152	4	3	3	3895	3	1	1	1	0	1	0	1	0	1	1	1	1	1	0	1	0	0	1	0	1	1	0	3
416	1	43	4	2	175	58	18.9388	2	2	3	2570	1	2	0	0	0	0	1	1	1	1	1	1	1	0	1	0	0	0	1	0	0	0	1	3
417	1	49	4	2	178	79	24.9337	1	1	3	2995	1	2	1	0	1	0	0	0	0	1	1	1	1	0	0	0	0	0	1	0	1	0	1	2
418	1	76	1	1	162	58	22.1003	4	3	3	3722	3	1	0	0	0	0	1	0	0	1	1	1	1	1	1	1	1	0	0	0	1	1	0	2
419	1	18	1	1	170	68	23.5294	4	3	3	3936	3	1	1	1	1	0	1	0	0	0	0	1	0	0	0	0	1	1	0	0	1	0	0	2
420	1	18	1	1	164	66	24.539	4	3	3	3512	3	1	1	1	0	0	1	1	1	1	0	0	1	1	0	0	1	1	1	0	1	1	0	3
421	1	50	4	1	174	73	24.1115	2	2	3	3638	3	1	0	1	1	1	1	0	0	0	0	1	1	0	1	1	1	0	0	0	0	0	0	1
422	1	29	2	2	172	75	25.3515	4	3	3	3957	3	2	0	1	1	0	0	1	1	1	1	0	0	1	1	0	0	0	0	0	1	1	0	1
423	1	18	1	2	168	57	20.1956	1	1	3	3589	3	1	0	0	1	1	1	0	1	1	1	1	1	1	0	1	1	1	0	0	0	0	0	4
424	1	72	5	2	172	63	21.2953	2	2	3	3581	3	1	1	1	1	0	1	0	1	0	0	0	1	0	1	1	1	0	1	0	0	0	1	3
425	1	39	3	1	160	56	21.875	3	2	3	3696	3	1	1	0	1	1	0	1	1	1	0	1	0	0	0	1	0	0	0	0	1	0	0	2
426	1	49	4	1	161	59	22.7615	2	2	3	3203	2	1	1	1	1	0	0	0	1	0	0	1	1	0	1	0	1	0	0	0	1	0	0	1
427	1	58	5	1	169	71	24.8591	2	2	3	3480	2	1	1	0	1	0	0	0	1	0	1	0	1	0	0	1	1	1	1	0	0	1	0	3
428	1	28	2	2	158	69	27.6398	1	1	3	3782	3	2	0	0	1	0	0	0	0	0	0	1	1	0	0	0	1	1	1	0	1	0	0	3
429	1	50	4	2	156	64	26.2985	2	2	3	4304	4	1	0	0	0	0	1	0	0	0	0	1	1	0	0	0	1	0	1	0	1	1	1	4
430	1	29	2	1	174	67	22.1297	4	3	3	3474	2	1	0	1	1	1	0	1	1	1	1	0	0	0	0	0	0	1	1	0	0	0	0	2
431	1	44	4	2	174	77	25.4327	1	1	3	4405	4	2	0	0	1	0	1	0	0	0	0	0	0	1	0	1	0	0	1	0	1	0	0	1
432	1	30	2	1	174	84	27.7447	4	3	3	3067	2	2	0	0	1	0	1	1	1	1	0	1	1	0	0	1	0	0	0	0	0	0	0	1
433	1	39	3	2	176	88	28.4091	1	1	3	3776	3	2	0	0	1	0	0	0	1	0	1	1	0	1	0	0	0	0	0	0	0	0	1	3
434	1	33	3	2	157	62	25.1532	4	3	3	4120	4	1	1	0	1	0	1	1	1	1	0	1	0	0	0	1	1	1	0	0	1	0	1	4
435	1	40	3	1	174	68	22.46	3	2	3	3897	3	1	1	1	1	0	0	0	0	0	0	0	0	1	0	0	0	1	0	0	1	0	0	2
436	1	39	3	2	160	60	23.4375	4	3	3	3777	3	2	0	0	1	0	0	1	0	1	0	1	1	0	0	0	0	0	0	0	0	1	1	3
437	1	48	4	1	176	64	20.6612	2	2	3	3067	2	1	1	1	1	1	0	1	1	0	0	1	0	0	1	0	0	1	0	0	0	0	0	3
438	1	34	3	2	168	67	23.7387	1	1	3	4117	4	1	0	1	0	0	0	0	1	1	0	0	1	1	1	1	1	1	1	0	0	0	1	1
439	1	42	4	1	177	72	22.9819	2	2	3	3115	2	2	1	1	1	1	0	1	0	0	1	1	0	0	0	1	1	1	1	0	1	1	1	4
440	1	49	4	2	176	69	22.2753	1	1	3	3357	2	2	0	0	1	0	1	0	0	1	1	0	1	0	0	0	1	1	1	0	0	1	1	2
441	1	34	3	2	162	53	20.1951	3	2	3	4154	4	1	0	1	1	0	1	0	0	0	0	0	1	1	0	0	0	1	0	0	1	1	1	4
442	1	47	4	2	174	59	19.4874	3	2	3	4016	4	1	1	1	1	0	1	0	1	0	1	1	0	0	1	1	1	1	1	0	1	0	1	3
443	1	76	1	2	167	52	18.6453	1	1	3	3525	3	1	0	0	1	0	0	0	0	0	1	1	1	1	0	1	0	0	0	0	0	1	1	4
444	1	33	3	1	167	50	17.9282	4	3	3	4425	4	2	1	0	1	0	1	1	1	0	1	0	0	1	0	1	1	0	1	0	1	0	1	4
445	1	39	3	1	161	55	21.2183	4	3	3	3961	3	2	1	0	1	1	0	1	0	0	1	1	0	1	0	1	0	0	1	0	1	1	1	3
446	1	40	4	1	171	61	20.8611	2	2	3	4158	4	2	0	1	1	1	0	0	0	1	0	0	1	1	1	0	1	1	0	0	1	0	0	1
447	1	40	3	1	173	68	22.7204	4	3	3	4383	4	2	1	0	1	1	1	0	0	0	0	0	1	1	1	1	0	1	0	0	1	0	1	4
448	1	45	4	2	168	59	20.9042	2	2	3	3246	2	1	0	0	1	0	0	1	0	1	1	1	0	0	0	0	1	1	1	0	1	0	1	3
449	1	49	4	2	176	84	27.1178	3	2	3	3295	2	1	0	1	0	1	0	1	1	0	1	1	0	0	1	1	0	0	1	0	1	1	0	1
450	1	35	3	1	173	68	22.7204	1	1	3	4486	4	2	0	1	0	1	0	0	1	0	1	1	1	0	1	0	0	0	0	0	0	1	0	1
451	1	29	2	1	177	77	24.5779	1	1	3	3678	3	2	1	1	1	1	1	1	1	1	0	1	0	0	1	1	0	1	1	0	0	1	#NULL!	1
452	1	39	3	1	164	49	18.2183	1	1	3	3541	3	2	1	0	1	0	1	1	0	1	0	1	0	1	0	1	0	0	0	1	1	0	#NULL!	1
453	1	76	1	1	164	57	21.1927	1	1	3	3654	3	1	0	0	1	1	1	0	1	1	1	0	1	0	0	1	1	0	0	0	0	1	#NULL!	4
454	1	32	3	1	159	50	19.7777	4	3	3	4018	4	2	1	0	1	0	0	1	1	0	0	0	0	0	0	0	1	1	0	1	0	0	#NULL!	1
455	1	40	3	1	166	62	22.4996	4	3	3	4257	4	2	1	0	1	1	0	1	0	0	0	0	1	1	0	1	0	1	0	1	1	1	#NULL!	2
456	1	39	3	1	156	58	23.833	1	1	3	3823	3	1	0	1	1	0	1	0	1	1	1	1	0	1	1	0	0	0	0	0	1	0	0	1
457	1	45	4	2	162	53	20.1951	3	2	3	4433	4	1	1	1	1	0	1	0	1	0	0	0	1	1	1	1	0	1	1	0	1	0	0	1
458	1	39	3	2	156	45	18.4911	4	3	3	3941	3	2	0	1	1	1	1	0	0	1	1	1	0	0	1	1	0	0	0	0	1	1	0	1
459	1	76	1	1	158	64	25.6369	4	3	3	3593	3	1	0	1	1	1	0	1	0	0	1	1	0	0	0	0	0	0	0	0	0	1	0	2
460	1	49	4	2	156	47	19.313	2	2	3	2719	1	2	0	0	1	0	0	1	1	0	1	1	1	1	0	1	1	1	1	0	0	1	1	1
461	1	50	4	1	177	67	21.3859	2	2	1	3044	2	2	0	1	1	0	0	1	0	0	1	1	0	1	1	0	1	0	1	0	0	1	0	3
462	1	30	3	2	175	80	26.1224	2	2	1	3365	2	1	0	1	1	0	1	1	0	1	1	1	0	0	1	0	1	0	0	0	1	1	1	1
463	1	39	3	2	165	66	24.2424	3	2	1	4292	4	1	0	1	0	0	1	0	1	0	1	1	0	0	1	0	0	1	1	0	1	1	0	2
464	1	39	3	2	172	75	25.3515	1	1	1	3281	2	2	0	1	1	1	0	0	1	1	0	1	1	1	1	1	1	0	0	0	0	0	1	3
465	1	18	1	2	176	88	28.4091	3	2	1	4208	4	1	0	1	0	1	1	0	1	0	0	0	0	1	1	0	1	0	1	0	0	1	1	3
466	1	28	2	1	164	66	24.539	1	1	1	3549	3	1	0	1	0	1	0	0	0	1	1	1	1	0	0	0	1	1	1	0	0	0	1	2
467	1	40	3	1	159	52	20.5688	4	3	1	3532	3	2	0	1	1	1	0	0	0	1	0	1	1	0	1	0	1	1	1	0	0	1	0	2
468	1	39	3	1	167	55	19.721	1	1	1	3713	3	2	0	1	1	1	0	1	0	0	1	1	1	0	0	0	1	1	1	0	0	0	1	2
469	1	50	4	1	166	72	26.1286	1	1	1	3635	3	1	0	1	0	1	0	0	1	1	1	1	0	0	0	0	0	1	1	0	0	1	1	2
470	1	41	4	1	167	68	24.3824	2	2	1	3435	2	2	0	1	0	1	0	1	1	1	1	1	1	1	0	1	0	1	0	0	1	1	0	2
471	1	29	2	1	174	69	22.7903	4	3	1	3894	3	2	1	1	1	0	1	1	1	0	1	0	0	1	1	1	0	1	0	0	0	1	0	3
472	1	18	1	1	168	65	23.03	3	2	1	3466	2	2	0	1	1	1	1	0	1	1	1	1	1	1	1	0	1	1	1	0	0	1	1	4
473	1	49	4	1	156	63	25.8876	2	2	1	3425	2	2	1	1	0	0	0	1	0	0	0	0	1	1	0	1	0	0	0	0	0	0	1	3
474	1	49	4	2	171	73	24.9649	3	2	1	3139	2	2	0	1	1	1	1	0	0	0	1	0	0	1	0	1	0	1	1	0	0	1	0	2
475	1	36	3	2	158	52	20.83	3	2	1	4257	4	1	1	1	1	1	1	0	1	1	1	1	0	0	1	1	0	0	1	0	1	1	0	1
476	1	33	3	1	156	65	26.7094	3	2	1	4366	4	2	1	1	1	1	0	1	0	1	0	1	1	0	0	0	1	1	1	0	0	1	1	1
477	1	36	3	1	169	73	25.5593	1	1	1	4065	4	1	0	1	1	1	0	0	0	0	0	1	1	1	0	0	1	1	0	1	1	1	#NULL!	2
478	1	29	2	1	177	68	21.7051	3	2	1	4019	4	2	0	1	1	1	1	0	1	0	1	1	1	1	1	0	1	0	0	0	0	0	1	1
479	1	79	5	2	161	60	23.1473	3	2	1	3901	3	1	0	1	1	0	0	1	0	0	0	1	1	1	1	1	0	0	1	0	1	1	0	1
480	1	35	3	1	163	50	18.8189	3	2	1	2953	1	1	1	1	0	1	1	1	0	0	1	0	1	0	0	1	1	1	1	0	0	1	1	4
481	1	39	3	1	169	62	21.7079	3	2	1	3515	3	1	1	1	0	0	0	1	1	1	1	0	0	1	1	0	0	1	0	0	1	1	0	4
482	1	28	2	1	156	63	25.8876	4	3	1	3622	3	2	0	1	1	1	1	0	0	1	1	1	0	1	1	1	1	1	0	0	1	1	1	2
483	1	13	1	1	162	57	21.7193	1	1	1	2837	1	1	0	1	0	0	0	0	0	1	1	0	0	0	1	0	1	0	0	0	1	0	0	3
484	1	50	4	1	173	63	21.0498	3	2	1	3702	3	1	1	1	1	1	1	0	1	0	0	0	0	1	1	0	0	0	0	0	0	0	1	3
485	1	18	1	1	175	67	21.8776	3	2	1	3738	3	1	0	1	1	1	1	1	0	1	0	1	1	1	1	0	1	0	0	0	0	0	1	3
486	1	39	3	2	156	50	20.5457	1	1	1	3629	3	2	0	1	1	1	1	0	0	0	0	1	0	1	0	0	0	1	0	0	1	1	1	1
487	1	30	3	2	171	61	20.8611	1	1	1	2541	1	2	1	1	0	1	0	1	0	0	1	0	1	1	1	0	0	0	1	0	1	0	0	2
488	1	39	3	1	173	72	24.0569	3	2	1	3826	3	1	0	1	1	0	0	1	0	0	0	1	1	1	0	1	0	0	0	0	1	1	1	1
489	1	39	3	1	165	60	22.0386	1	1	1	3323	2	2	0	1	1	1	0	1	0	0	1	1	0	0	1	1	1	0	0	0	1	0	1	3
490	1	45	4	2	166	76	27.5802	2	2	1	2752	1	2	1	1	1	1	0	1	0	1	1	1	1	0	0	0	1	0	1	0	0	1	1	1
491	1	41	4	2	175	66	21.551	2	2	1	2819	1	1	1	1	1	0	0	0	0	1	0	1	0	0	0	1	0	0	1	0	0	1	1	4
492	1	76	1	1	174	84	27.7447	4	3	1	3748	3	1	1	1	1	0	1	0	0	0	0	1	0	0	1	0	0	0	1	0	0	0	0	3
493	1	50	4	2	173	68	22.7204	3	2	1	3747	3	1	1	1	1	1	1	0	1	1	0	1	1	0	1	0	0	0	1	0	0	0	0	2
494	1	49	4	1	157	59	23.9361	2	2	1	3060	2	2	0	1	1	0	0	0	1	1	1	1	0	0	1	1	0	0	1	0	1	1	0	2
495	1	50	4	2	174	68	22.46	1	1	1	3967	3	1	0	1	1	1	0	0	1	0	0	1	1	0	1	1	1	0	1	0	1	1	0	2
496	1	18	1	1	166	57	20.6852	4	3	1	3080	2	1	0	1	0	0	0	0	1	1	0	0	0	0	1	0	0	0	0	0	0	1	0	4
497	1	24	2	2	172	64	21.6333	4	3	1	3376	2	1	1	1	1	1	1	1	0	1	1	0	1	1	0	0	0	1	1	0	1	1	0	3
498	1	56	5	2	157	46	18.662	2	2	1	3347	2	1	0	1	1	1	0	1	1	0	0	0	1	1	1	1	0	1	1	0	0	0	0	4
499	1	39	3	2	168	66	23.3844	3	2	1	3295	2	2	1	1	1	0	1	0	1	0	0	1	1	1	1	0	1	0	0	0	0	0	0	4
500	1	35	3	2	176	70	22.5981	4	3	1	4468	4	2	1	1	1	1	1	1	1	1	1	1	0	0	0	1	0	1	1	0	1	1	0	2
501	1	50	4	2	165	52	19.1001	1	1	1	3616	3	1	0	1	1	0	0	0	1	1	0	0	0	1	0	0	0	1	1	0	1	0	1	3
502	1	29	2	2	171	74	25.3069	4	3	1	3762	3	1	1	1	1	1	1	0	0	1	1	1	0	1	1	0	0	0	1	0	0	1	1	1
503	1	39	3	1	157	44	17.8506	4	3	1	3645	3	2	0	1	1	0	0	1	0	0	0	1	1	1	1	1	1	1	0	0	1	1	1	3
504	1	35	3	1	166	76	27.5802	4	3	1	4022	4	2	1	1	0	1	1	1	1	0	1	0	0	0	1	0	0	1	0	0	1	0	1	3
505	1	30	3	1	157	60	24.3418	4	3	1	4183	4	2	1	1	1	0	1	0	0	0	1	1	1	1	0	1	1	1	0	0	1	0	0	3
506	1	29	2	1	171	72	24.623	1	1	1	4239	4	2	0	1	1	1	1	0	0	0	0	0	0	1	1	1	1	1	0	0	0	0	0	2
507	1	32	3	1	169	62	21.7079	4	3	1	4483	4	1	0	1	1	0	1	1	1	0	1	0	0	1	0	0	1	0	1	0	1	0	0	2
508	1	29	2	1	161	69	26.6193	4	3	1	3904	3	1	1	1	0	1	0	0	1	0	1	0	1	1	1	0	0	1	0	0	1	0	0	3
509	1	64	5	2	156	56	23.0112	3	2	1	3090	2	1	1	1	0	1	1	0	1	1	1	0	1	1	1	0	1	0	1	0	0	1	0	3
510	1	20	2	2	174	77	25.4327	4	3	1	3302	2	1	0	1	1	1	1	1	1	1	0	1	0	0	0	0	1	0	1	0	1	0	1	1
511	1	39	3	1	168	77	27.2817	1	1	1	3532	3	2	1	1	0	0	0	0	0	1	0	1	0	1	0	1	0	0	0	0	0	1	0	2
512	1	39	3	1	172	64	21.6333	1	1	1	3873	3	2	0	1	1	1	0	1	0	1	0	1	0	1	1	1	0	0	1	1	1	0	0	1
513	1	39	3	2	166	57	20.6852	4	3	1	3821	3	2	0	1	1	0	0	0	0	1	1	1	1	0	1	0	0	1	1	1	0	0	1	4
514	1	39	3	2	172	76	25.6896	2	2	1	3896	3	1	0	1	0	1	0	0	1	0	1	1	0	1	1	1	0	1	1	0	1	1	#NULL!	2
515	1	41	4	1	160	65	25.3906	1	1	1	4330	4	2	0	1	1	0	0	0	0	1	1	1	1	1	0	1	1	1	0	1	1	0	#NULL!	3
516	1	38	3	2	177	86	27.4506	1	1	1	3496	2	2	1	1	0	0	0	0	0	0	1	0	1	1	1	0	0	1	1	0	1	0	1	2
517	1	39	3	2	166	65	23.5883	4	3	1	3491	2	2	0	1	0	0	1	1	1	0	0	1	1	0	1	1	0	1	1	0	0	0	0	3
518	1	49	4	2	168	58	20.5499	2	2	1	2824	1	2	0	1	1	1	1	0	1	0	1	0	1	0	0	0	0	0	1	0	0	1	1	3
519	1	39	3	2	164	51	18.9619	3	2	1	3950	3	2	1	1	1	1	0	0	1	0	0	1	0	0	0	1	1	1	1	0	1	0	0	2
520	1	43	4	2	173	63	21.0498	2	2	1	4393	4	1	1	1	0	0	1	0	1	1	0	1	1	0	1	0	0	1	1	0	1	1	0	2
521	1	39	3	2	175	70	22.8571	3	2	1	3500	3	1	0	1	1	0	0	1	1	0	1	0	0	0	0	1	1	0	0	0	0	0	0	3
522	1	50	4	2	174	79	26.0933	1	1	1	3549	3	1	0	0	1	0	0	0	0	0	1	1	0	1	0	0	1	1	1	0	1	1	1	4
523	1	30	2	2	176	70	22.5981	4	3	1	3901	3	2	1	1	0	1	0	0	1	1	1	1	1	0	1	0	0	0	1	0	0	1	0	4
524	1	63	5	1	161	62	23.9188	1	1	1	3143	2	1	0	1	1	0	1	0	1	0	0	0	1	1	0	0	0	1	1	0	1	1	0	4
525	1	53	5	1	159	52	20.5688	2	2	1	2917	1	1	0	0	0	1	1	0	0	0	1	1	1	1	1	1	0	0	0	0	0	1	1	4
526	1	50	4	2	167	57	20.4382	1	1	1	3703	3	1	0	1	0	1	1	0	1	1	1	1	1	1	0	1	1	0	1	0	0	1	1	2
527	1	52	5	1	173	65	21.7181	3	2	1	2763	1	1	1	1	0	1	0	0	0	1	1	1	0	1	1	1	1	1	1	0	1	0	1	3
528	1	56	5	1	161	67	25.8478	3	2	1	2503	1	1	1	1	1	1	1	0	0	0	0	1	1	1	1	0	1	1	1	0	1	0	1	1
529	1	40	3	2	175	62	20.2449	1	1	1	3882	3	2	0	1	1	1	1	0	0	1	1	0	0	1	0	1	0	0	1	0	0	0	1	3
530	1	50	4	2	168	73	25.8645	2	2	1	2788	1	1	0	1	1	1	1	1	1	0	0	1	1	1	1	0	1	1	1	0	0	0	1	2
531	1	39	3	2	165	62	22.7732	1	1	1	3889	3	2	0	1	1	0	0	0	0	1	0	1	1	0	1	0	0	1	1	0	1	0	0	1
532	1	29	2	2	177	59	18.8324	4	3	1	3544	3	2	0	0	1	1	1	0	0	0	1	1	0	1	1	0	0	0	1	0	1	1	1	3
533	1	30	2	2	160	65	25.3906	4	3	1	3999	3	1	0	0	1	1	1	0	1	1	0	1	1	1	0	1	1	1	1	0	0	0	1	3
534	1	29	2	2	176	83	26.7949	4	3	1	3859	3	1	1	0	1	1	0	0	0	0	0	1	1	0	0	1	0	0	1	0	1	1	0	2
535	1	50	4	2	164	67	24.9108	1	1	1	3682	3	1	0	1	1	0	0	0	0	0	0	0	0	0	0	0	0	0	1	0	0	1	0	1
536	1	50	4	2	166	70	25.4028	2	2	1	3817	3	1	0	0	1	0	0	1	1	0	1	1	0	0	0	0	0	1	1	0	1	1	0	3
537	1	39	3	2	160	69	26.9531	3	2	1	3518	3	1	0	1	1	1	1	1	0	1	0	1	0	1	1	0	1	1	0	0	0	1	0	2
538	1	39	3	2	160	71	27.7344	3	2	1	3827	3	2	0	0	1	0	0	1	1	0	1	0	0	1	1	1	1	0	1	0	0	1	1	4
539	1	50	4	2	171	68	23.255	2	2	1	3880	3	2	1	1	1	1	1	0	1	1	1	1	0	0	0	0	0	1	1	0	0	0	1	3
540	1	50	4	2	173	58	19.3792	1	1	1	3565	3	2	0	0	1	1	0	0	1	0	0	0	1	1	1	0	0	0	1	0	0	1	1	1
541	1	29	2	2	177	63	20.1092	3	2	1	3725	3	2	0	0	1	1	0	0	0	1	0	0	0	1	0	1	1	1	0	0	0	0	1	3
542	1	39	3	2	170	73	25.2595	1	1	1	3935	3	2	1	1	1	1	0	1	1	0	1	0	0	1	0	1	0	1	0	0	1	0	0	4
543	1	41	4	2	174	60	19.8177	1	1	1	4001	4	1	0	1	1	1	0	0	1	1	1	0	1	0	1	1	0	0	1	0	0	1	1	3
544	1	50	4	2	160	63	24.6094	2	2	1	3609	3	2	1	0	1	0	1	0	1	0	0	0	0	1	0	0	1	0	1	0	1	1	1	2
545	1	50	4	2	157	53	21.5019	1	1	1	3885	3	2	0	0	0	0	1	0	0	1	1	0	1	1	1	0	1	0	1	0	1	1	0	2
546	1	40	3	2	162	52	19.8141	1	1	1	3769	3	2	0	1	1	0	0	0	1	0	1	0	1	1	0	1	0	1	0	0	0	1	0	3
547	1	56	5	1	168	69	24.4473	2	2	1	3022	2	1	1	1	0	1	0	1	1	1	0	1	1	0	0	0	0	0	0	0	1	0	0	2
548	1	29	2	2	175	83	27.102	4	3	1	3772	3	2	1	0	0	1	0	1	0	0	0	0	1	0	0	1	0	1	0	0	0	1	0	1
549	1	50	4	2	160	62	24.2188	2	2	1	3705	3	1	1	1	1	0	0	0	0	1	1	1	1	0	1	1	1	0	1	0	0	1	0	3
550	1	29	2	2	167	60	21.5139	4	3	1	3659	3	1	1	0	1	1	1	1	1	1	1	1	0	1	1	0	0	1	1	0	1	1	1	2
551	1	41	4	2	157	44	17.8506	2	2	1	4271	4	1	1	1	1	0	0	0	0	0	1	0	0	1	0	1	1	1	1	0	0	0	1	4
552	1	39	3	2	159	62	24.5243	1	1	1	3074	2	1	0	0	1	1	1	0	1	1	1	1	0	1	1	0	0	0	0	0	1	0	1	3
553	1	50	4	2	155	52	21.6441	2	2	1	3818	3	2	0	0	1	0	0	0	1	1	0	1	1	0	1	1	1	1	1	0	1	1	0	3
554	1	49	4	2	170	70	24.2215	2	2	3	3030	2	2	0	0	0	1	0	1	0	0	1	1	0	0	0	0	1	1	1	0	1	1	1	3
555	1	39	3	1	174	70	23.1206	1	1	3	3670	3	2	0	1	1	0	0	0	0	0	1	1	0	0	0	1	1	0	0	0	1	0	0	3
556	1	36	3	1	157	69	27.993	2	2	3	3396	2	1	1	0	0	0	0	1	0	0	0	0	0	0	0	0	1	0	1	0	0	0	0	1
557	1	32	3	1	169	67	23.4586	4	3	3	4385	4	2	1	1	0	1	1	1	0	0	0	0	1	0	0	0	1	0	1	0	0	1	0	3
558	1	59	5	1	163	61	22.9591	2	2	1	2835	1	1	0	0	1	0	0	0	1	1	1	0	0	1	0	0	0	0	1	0	0	1	1	2
559	1	51	5	1	160	70	27.3438	1	1	1	2837	1	1	0	1	1	1	0	0	1	1	0	1	0	1	0	0	0	0	1	0	1	0	0	1
560	1	50	4	2	155	48	19.9792	2	2	1	3700	3	1	1	1	1	0	0	0	0	0	1	0	0	1	0	1	1	0	1	0	0	0	1	2
561	1	39	3	2	166	62	22.4996	1	1	1	3902	3	2	0	0	1	0	0	1	0	0	0	0	0	0	1	0	1	1	1	0	0	0	1	3
562	1	50	4	2	155	46	19.1467	2	2	1	3707	3	2	0	1	1	1	0	1	1	1	0	1	1	0	1	1	1	1	1	0	1	1	0	2
563	1	39	3	2	173	71	23.7228	1	1	1	3809	3	2	1	1	0	0	1	1	0	1	0	1	0	1	1	1	1	0	1	0	0	0	1	1
564	1	67	5	1	172	68	22.9854	3	2	1	3442	2	1	1	0	0	1	1	1	0	1	0	1	1	0	1	1	1	0	1	0	0	1	0	3
565	1	75	5	1	173	75	25.0593	3	2	1	3457	2	1	0	0	0	0	0	1	1	1	1	0	1	0	0	1	1	1	1	0	0	1	1	1
566	1	39	3	2	176	81	26.1493	1	1	1	3832	3	2	1	0	1	1	0	1	1	1	1	1	1	0	0	1	1	1	1	0	0	1	0	3
567	1	50	4	2	177	73	23.3011	3	2	1	3665	3	1	1	0	1	1	0	0	0	1	1	0	1	0	0	1	0	0	1	0	0	1	0	2
568	1	50	4	2	160	67	26.1719	3	2	1	3852	3	2	1	1	0	1	1	1	0	1	1	0	0	0	1	1	0	1	1	0	0	1	0	1
569	1	40	3	2	172	67	22.6474	3	2	1	3576	3	2	1	0	0	0	1	1	0	1	1	0	0	0	1	0	1	0	1	0	0	1	1	2
570	1	29	2	2	176	79	25.5036	1	1	1	3931	3	2	0	0	0	0	0	0	1	0	0	1	1	0	1	1	0	0	0	0	1	0	1	2
571	1	30	3	2	176	74	23.8895	1	1	1	4407	4	1	1	1	1	0	1	1	0	0	1	0	0	1	1	0	1	0	1	0	0	1	1	1
572	1	39	3	2	177	70	22.3435	1	1	1	3759	3	2	1	1	1	1	1	0	1	0	0	0	0	0	0	0	1	1	1	0	0	1	1	1
573	1	50	4	2	176	83	26.7949	2	2	1	3646	3	2	1	1	1	1	0	1	1	1	1	1	1	0	0	1	1	1	1	0	1	0	1	1
574	1	29	2	2	156	66	27.1203	4	3	1	3543	3	1	1	1	0	0	1	0	1	0	0	1	1	1	0	1	1	1	0	0	1	1	0	2
575	1	66	5	1	171	83	28.3848	1	1	1	3039	2	1	0	1	0	0	0	0	0	1	0	1	1	1	0	0	1	0	1	0	1	1	0	3
576	1	50	5	2	170	71	24.5675	2	2	1	3030	2	1	1	1	1	1	1	0	1	0	0	1	1	0	0	0	1	1	1	0	1	1	1	4
577	1	79	4	1	175	57	18.6122	2	2	1	3554	3	1	1	1	0	0	1	1	0	1	0	1	0	1	0	0	0	1	0	0	0	0	1	4
578	1	40	4	2	156	67	27.5312	3	2	1	3388	2	2	0	1	1	0	0	0	0	1	0	1	1	0	0	1	1	0	1	0	0	0	1	3
579	1	39	3	2	161	69	26.6193	2	2	1	3677	3	1	0	0	1	0	0	1	1	0	1	1	0	1	1	1	1	0	0	0	0	1	0	4
580	1	50	4	2	178	83	26.1962	1	1	1	3673	3	2	0	0	0	1	0	1	0	0	1	0	1	0	0	1	0	1	1	0	1	1	1	1
581	1	29	2	2	170	62	21.4533	3	2	1	3514	3	1	1	1	1	0	1	0	1	1	1	0	1	1	0	0	0	0	0	0	0	0	1	4
582	1	29	2	2	158	62	24.8358	3	2	1	3561	3	2	0	1	1	1	1	0	1	1	1	0	1	1	1	0	1	1	1	0	0	1	0	4
583	1	56	5	1	165	58	21.3039	3	2	1	3271	2	1	0	0	1	1	1	1	0	1	0	0	0	0	0	0	1	1	0	0	0	0	1	4
584	1	39	3	2	178	72	22.7244	1	1	1	4062	4	2	0	0	0	1	0	0	1	1	1	1	0	0	1	1	1	1	0	0	1	0	1	2
585	1	50	4	2	164	60	22.3081	2	2	1	3554	3	2	1	1	0	1	1	1	1	0	0	0	1	1	0	1	1	0	1	0	1	1	1	2
586	1	29	2	2	171	78	26.6749	1	1	1	4035	4	2	0	0	0	0	1	0	1	0	0	1	0	1	0	1	1	1	0	0	1	1	1	3
587	1	69	5	1	163	68	25.5937	3	2	1	3454	2	1	1	0	1	0	0	1	0	1	0	0	1	1	1	1	0	0	0	0	1	1	1	2
588	1	40	3	2	177	74	23.6203	3	2	1	3295	2	1	0	0	1	1	1	1	1	0	0	1	0	1	1	0	0	1	1	0	0	1	1	4
589	1	64	5	1	173	60	20.0474	2	2	1	3244	2	1	1	1	1	1	1	0	1	1	0	1	0	0	0	0	1	1	0	0	0	0	1	4
590	1	31	3	2	163	64	24.0882	1	1	1	2999	1	2	0	1	1	1	1	0	1	0	1	0	0	1	0	1	1	0	1	0	1	0	0	2
591	1	29	2	2	165	66	24.2424	3	2	1	3993	3	1	1	0	1	1	0	0	0	0	0	0	1	1	1	1	1	0	1	0	0	0	0	3
592	1	40	3	2	160	55	21.4844	3	2	1	4224	4	2	1	1	1	1	1	0	0	0	0	1	1	1	1	1	0	0	0	0	0	1	1	4
593	1	56	5	1	155	57	23.7253	3	2	1	3195	2	1	1	0	1	1	0	1	1	1	0	1	0	1	1	0	0	1	0	0	1	0	1	3
594	1	39	3	2	160	61	23.8281	1	1	1	3667	3	2	0	1	1	1	1	0	0	1	1	1	0	1	1	0	0	0	0	0	0	1	0	1
595	1	50	4	2	175	83	27.102	2	2	1	3930	3	1	0	1	0	0	1	1	1	0	0	0	0	0	1	1	1	1	1	0	0	1	0	3
596	1	40	3	2	176	76	24.5351	4	3	3	4433	4	2	0	1	0	0	0	1	1	0	0	1	1	1	1	1	1	0	0	0	1	0	1	4
597	1	69	5	1	160	54	21.0938	2	2	3	3402	2	1	0	0	1	1	0	1	0	0	1	1	1	1	1	1	1	1	1	0	1	1	0	4
598	1	32	3	2	169	60	21.0077	1	1	3	4385	4	1	0	0	1	0	0	0	0	1	0	0	1	0	0	1	0	0	1	0	1	1	0	3
599	1	30	2	2	172	70	23.6614	4	3	3	3116	2	1	1	0	1	1	1	0	1	0	1	0	1	1	1	0	0	0	0	0	0	1	1	3
600	1	56	5	1	170	57	19.7232	2	2	3	3096	2	1	0	0	1	0	0	1	1	0	0	0	1	0	0	0	1	1	1	0	1	0	0	2
601	1	32	3	2	176	83	26.7949	1	1	3	4132	4	2	0	1	1	0	1	0	0	0	0	1	0	1	0	0	1	1	1	0	0	1	0	2
602	1	32	3	2	171	79	27.0169	4	3	3	4416	4	2	0	1	1	0	1	0	0	1	1	0	1	1	0	1	0	0	1	0	1	0	0	4
603	1	40	4	2	161	54	20.8325	2	2	3	3490	2	2	1	1	1	0	0	0	0	0	1	1	0	0	0	1	1	0	1	0	0	1	0	2
604	1	75	5	1	167	71	25.4581	2	2	3	3838	3	1	1	0	1	0	1	1	1	1	1	0	1	0	1	0	1	0	0	0	0	1	#NULL!	2
605	1	39	3	2	175	77	25.1429	2	2	3	3922	3	1	1	0	1	1	0	1	1	1	0	1	1	0	1	0	1	1	1	0	0	1	0	2
606	1	31	4	2	175	77	25.1429	2	2	3	2833	1	2	0	0	1	1	1	0	0	0	1	1	1	1	0	1	1	1	0	0	1	1	0	2
607	1	40	3	2	164	73	27.1416	3	2	3	3642	3	1	1	1	1	0	1	1	1	0	1	1	0	0	0	0	1	0	1	0	0	1	1	1
608	1	72	5	1	160	65	25.3906	2	2	3	3841	3	1	1	0	1	1	0	0	0	0	1	1	0	1	1	0	1	0	0	0	0	0	1	1
609	1	50	4	2	176	61	19.6927	2	2	3	3914	3	2	1	0	1	1	0	1	1	0	1	1	0	0	1	0	0	1	1	0	0	0	0	1
610	1	29	2	2	157	66	26.7759	4	3	3	3887	3	2	0	0	0	1	0	0	0	0	1	0	0	0	0	1	1	1	1	0	0	0	0	1
611	1	29	2	2	160	53	20.7031	3	2	3	3411	2	1	0	1	1	1	1	0	1	0	1	0	0	0	0	0	0	1	1	0	1	1	1	1
612	1	39	3	1	156	68	27.9421	2	2	3	3371	2	1	1	0	0	0	0	0	1	1	1	1	0	0	1	0	0	1	1	0	0	0	0	2
613	1	39	3	1	173	71	23.7228	3	2	3	3908	3	1	1	0	1	0	0	0	1	0	1	1	0	0	0	0	0	1	1	0	0	0	1	4
614	1	50	4	2	160	71	27.7344	2	2	3	3632	3	2	0	0	1	1	0	0	0	1	1	0	0	1	1	0	0	0	1	0	1	1	1	1
615	0	61	5	1	172	68	22.9854	2	2	1	3097	2	2	1	1	1	1	1	0	0	1	1	1	0	0	1	1	0	1	1	0	0	0	0	3
616	0	39	3	2	169	61	21.3578	3	2	1	3885	3	2	1	0	0	0	0	1	1	0	1	0	0	1	1	0	0	0	0	0	0	1	1	2
617	0	45	4	1	175	61	19.9184	3	2	1	2956	1	2	0	0	1	1	1	1	0	1	0	0	0	1	0	1	1	0	0	0	1	0	1	1
618	0	50	5	1	175	62	20.2449	2	2	1	3327	2	2	1	1	0	0	0	0	0	0	0	1	0	0	1	1	0	1	0	0	0	1	0	3
619	0	39	3	2	165	63	23.1405	1	1	1	3759	3	2	0	1	1	0	0	0	1	1	0	1	1	0	0	0	1	0	0	0	0	0	0	3
620	0	20	2	1	173	62	20.7157	3	2	1	4220	4	1	1	1	0	1	0	1	0	0	1	0	0	1	1	1	0	1	0	0	1	1	1	3
621	0	35	3	1	161	48	18.5178	3	2	1	4247	4	2	1	0	1	0	0	0	0	0	1	0	1	1	1	0	0	1	0	0	1	0	1	4
622	0	41	4	1	163	60	22.5827	2	2	1	2931	1	1	0	1	1	0	1	0	0	1	0	0	0	1	0	1	1	0	0	0	1	0	0	1
623	0	18	1	1	156	55	22.6003	1	1	1	3423	2	2	1	1	1	1	0	0	0	0	0	1	1	1	1	1	1	1	1	1	1	0	0	1
624	0	51	5	1	173	56	18.7109	2	2	1	2916	1	1	0	1	0	1	1	1	0	0	1	0	1	0	0	1	0	1	1	0	0	1	1	3
625	0	17	2	1	169	72	25.2092	4	3	1	4281	4	2	0	0	0	1	1	1	0	0	1	0	0	1	1	1	0	1	1	0	1	0	0	3
626	0	10	1	1	139	42	21.738	1	1	1	2697	1	1	0	0	1	0	0	0	0	0	0	0	0	1	1	0	0	0	1	0	1	1	1	3
627	0	18	1	1	166	57	20.6852	1	1	1	3864	3	2	1	0	1	0	0	1	1	1	0	0	1	0	1	0	0	0	0	0	1	0	1	3
628	0	39	3	1	161	55	21.2183	2	2	1	2506	1	1	1	0	1	1	1	0	0	1	0	0	0	0	1	0	0	0	0	0	0	0	1	4
629	0	39	3	1	167	71	25.4581	2	2	1	3428	2	2	0	0	1	1	0	1	1	0	1	1	0	0	1	1	0	1	0	0	0	0	1	3
630	0	20	2	1	158	52	20.83	3	2	1	4218	4	2	1	1	0	0	1	0	0	1	0	1	0	1	1	1	0	1	0	0	0	0	0	3
631	0	29	2	1	177	64	20.4284	4	3	1	3976	3	1	1	1	1	1	0	0	0	0	0	1	0	0	0	0	0	0	1	0	1	1	0	2
632	0	76	1	1	171	72	24.623	2	2	1	3551	3	1	0	1	1	1	1	0	1	0	1	1	1	0	0	0	0	0	1	0	0	1	1	4
633	0	50	4	1	172	70	23.6614	3	2	1	3672	3	1	0	1	1	0	1	1	1	1	1	0	0	1	1	0	1	0	0	0	1	0	0	2
634	0	39	3	2	164	63	23.4236	2	2	1	3301	2	2	1	0	0	0	1	0	0	1	1	0	0	1	0	0	1	0	1	0	0	0	0	2
635	0	56	5	2	173	58	19.3792	2	2	1	3291	2	2	1	0	0	1	1	1	1	0	1	0	1	0	1	1	1	0	1	0	1	0	1	4
636	0	18	1	1	173	62	20.7157	3	2	1	3923	3	2	0	0	0	1	1	1	1	1	0	1	1	0	1	1	1	0	0	0	0	1	1	4
637	0	65	5	1	169	76	26.6097	2	2	1	3097	2	1	1	1	1	1	1	1	1	0	0	0	0	0	0	1	0	1	1	0	0	1	1	2
638	0	38	3	1	164	61	22.68	3	2	1	3054	2	1	1	1	1	1	0	1	0	1	0	1	0	0	0	0	1	0	0	0	0	1	0	4
639	0	63	5	1	161	60	23.1473	3	2	1	3097	2	1	1	1	0	0	0	0	0	0	0	0	0	0	1	1	1	0	1	0	1	1	0	2
640	0	17	1	1	163	60	22.5827	3	2	1	2653	1	1	1	1	1	0	1	1	0	0	0	0	1	0	1	0	1	1	0	0	0	1	1	1
641	0	29	2	1	159	69	27.2932	3	2	1	4045	4	2	1	0	0	1	1	0	0	0	1	1	0	0	1	0	0	0	0	0	0	0	0	2
642	0	30	2	1	166	72	26.1286	3	2	1	4005	4	2	0	1	1	1	0	0	0	1	1	0	1	1	0	1	1	1	0	0	1	0	0	4
643	0	29	2	1	165	65	23.8751	4	3	1	4029	4	1	1	0	0	0	0	1	0	0	0	1	0	0	0	1	0	1	1	0	1	1	1	2
644	0	50	4	1	170	77	26.6436	1	1	1	3806	3	2	0	0	1	0	1	0	1	1	0	1	0	0	1	1	1	1	1	0	0	0	0	3
645	0	40	3	1	171	78	26.6749	1	1	1	3835	3	2	0	0	1	1	0	0	0	1	0	1	1	1	1	0	1	0	0	0	0	1	0	4
646	0	29	2	1	156	52	21.3675	4	3	1	3629	3	2	1	0	1	1	1	1	0	0	1	1	1	1	0	1	1	1	0	0	0	0	0	3
647	0	39	3	1	178	67	21.1463	1	1	1	3514	3	2	0	0	1	1	1	0	0	0	0	1	1	1	0	1	0	1	0	0	1	1	0	2
648	0	75	1	1	175	83	27.102	1	1	1	3650	3	1	0	1	0	1	1	1	1	1	0	0	1	0	1	1	0	0	1	0	1	0	0	1
649	0	61	5	2	161	58	22.3757	2	2	1	4411	4	2	1	0	0	1	0	1	1	1	1	1	1	1	0	0	1	1	1	0	1	1	0	3
650	0	31	3	1	177	70	22.3435	3	2	1	2696	1	2	1	0	1	0	0	0	1	0	0	1	0	0	1	0	0	1	1	0	1	1	1	1
651	0	29	2	1	173	57	19.0451	1	1	1	3694	3	2	0	1	0	1	0	1	1	1	0	0	1	1	1	0	0	1	1	0	0	0	1	1
652	0	49	4	1	168	75	26.5731	3	2	1	3377	2	1	0	0	1	0	1	0	0	1	0	0	1	1	1	1	1	0	1	0	1	0	0	3
653	0	69	5	1	164	71	26.398	1	1	1	4302	4	2	0	0	1	0	1	0	0	0	1	0	0	0	0	0	1	0	1	0	1	1	1	4
654	0	39	3	1	161	49	18.9036	4	3	1	3952	3	2	0	1	1	1	0	0	1	1	1	0	0	0	1	1	1	0	1	0	1	1	1	4
655	0	49	4	2	158	60	24.0346	1	1	1	3382	2	1	0	1	1	1	0	0	0	0	0	0	0	0	0	1	1	1	1	0	0	0	0	3
656	0	66	5	1	176	58	18.7242	2	2	1	4336	4	2	1	1	0	0	0	0	0	1	1	0	0	1	0	1	0	0	0	0	0	1	0	4
657	0	50	4	1	161	63	24.3046	2	2	1	3670	3	2	0	1	1	0	0	0	1	0	0	1	0	1	1	1	1	1	1	0	1	1	0	4
658	0	39	3	1	166	64	23.2254	1	1	1	3664	3	2	0	0	0	1	1	0	0	0	1	0	1	1	0	0	1	1	1	0	0	0	0	2
659	0	50	4	1	167	63	22.5896	2	2	1	3904	3	2	0	0	0	1	0	1	1	0	1	1	0	0	0	1	1	1	1	0	1	0	1	3
660	0	40	3	2	169	75	26.2596	3	2	1	3618	3	2	1	0	0	1	1	1	0	1	1	0	0	0	1	1	1	1	1	0	1	1	1	3
661	0	35	3	1	176	83	26.7949	2	2	1	3113	2	2	1	1	0	1	1	0	0	0	1	1	0	0	0	0	1	1	1	0	0	1	1	1
662	0	61	5	2	174	62	20.4783	2	2	1	4118	4	2	1	0	1	0	0	1	1	0	0	1	1	1	1	1	0	1	0	0	0	1	0	1
663	0	58	5	1	175	76	24.8163	2	2	1	3366	2	1	0	0	1	1	0	0	0	0	1	1	1	1	0	1	1	0	1	0	1	1	1	4
664	0	18	1	2	171	79	27.0169	1	1	1	3706	3	1	0	1	0	0	1	1	1	0	1	1	1	0	0	0	1	1	0	0	1	1	1	3
665	0	26	2	1	176	72	23.2438	4	3	1	2958	1	1	0	1	0	0	1	1	1	0	0	0	0	1	0	0	1	1	0	0	0	1	0	1
666	0	18	1	1	167	65	23.3067	1	1	1	4417	4	1	0	1	0	1	1	0	1	1	0	1	0	1	0	1	1	0	0	0	1	0	1	4
667	0	29	2	1	168	75	26.5731	4	3	1	3617	3	2	0	1	0	0	1	0	0	0	1	0	0	1	1	1	1	0	0	0	0	1	0	3
668	0	39	3	1	169	74	25.9095	4	3	1	3825	3	2	0	1	1	0	0	1	0	0	0	1	0	1	1	1	1	0	1	0	1	1	1	3
669	0	50	4	2	172	57	19.2672	1	1	1	3507	3	2	0	0	0	0	0	0	0	1	0	0	0	0	0	0	1	0	0	0	0	0	1	4
670	0	54	5	1	157	54	21.9076	3	2	1	3185	2	1	1	0	0	0	0	1	1	0	1	1	0	1	0	1	1	0	1	0	0	1	1	3
671	0	54	5	1	177	75	23.9395	2	2	1	2622	1	1	0	1	0	0	0	1	0	1	0	1	1	1	1	0	0	1	0	0	1	0	1	3
672	0	31	3	1	156	45	18.4911	3	2	1	2706	1	2	0	1	0	0	0	0	1	0	1	1	0	1	1	1	1	1	1	0	1	1	0	2
673	0	32	3	2	167	66	23.6652	3	2	1	3099	2	1	1	1	0	0	0	0	1	0	0	0	0	1	1	1	1	0	1	0	1	0	0	1
674	0	18	1	1	166	57	20.6852	3	2	1	3202	2	2	1	0	0	1	0	1	1	1	1	0	0	0	0	1	0	0	0	0	0	0	1	1
675	0	34	3	2	160	65	25.3906	3	2	1	4294	4	2	1	0	1	0	1	1	1	1	0	0	1	0	1	1	0	0	0	0	1	0	1	4
676	0	18	1	1	166	61	22.1367	3	2	1	3721	3	2	1	1	1	1	0	1	0	0	1	1	0	1	0	0	0	1	1	0	0	1	1	4
677	0	43	4	2	177	76	24.2587	3	2	1	3092	2	2	0	0	0	0	0	1	0	0	0	1	1	0	0	1	1	1	0	0	0	0	1	1
678	0	50	4	1	176	67	21.6296	3	2	1	3889	3	1	0	0	1	0	1	1	0	0	1	0	1	1	0	1	1	0	0	0	0	0	1	3
679	0	40	3	2	162	50	19.052	3	2	1	3493	2	2	1	0	0	1	1	1	0	0	0	1	0	0	1	1	0	1	1	0	1	1	1	1
680	0	53	5	1	158	47	18.8271	3	2	1	2621	1	2	1	0	0	1	0	0	1	1	0	0	1	0	0	1	0	0	0	0	1	1	0	3
681	0	63	5	1	172	61	20.6193	2	2	1	3435	2	1	0	0	0	1	1	1	1	1	1	0	1	0	0	0	0	0	0	0	1	0	0	1
682	0	30	3	2	161	72	27.7767	2	2	1	2621	1	1	1	0	1	0	1	0	0	0	1	1	1	1	0	1	1	1	0	0	1	1	0	3
683	0	72	5	2	174	72	23.7812	2	2	1	3767	3	1	0	0	0	0	1	0	1	1	1	0	1	0	0	0	1	1	0	0	0	0	1	1
684	0	39	3	2	171	80	27.3588	4	3	1	3630	3	2	1	0	0	1	1	0	1	1	0	0	1	0	0	1	1	1	1	0	1	1	1	1
685	0	36	3	2	162	60	22.8624	2	2	1	3220	2	2	0	1	1	1	1	0	0	0	1	0	0	1	0	1	0	0	0	0	1	1	0	3
686	0	38	3	1	175	70	22.8571	4	3	1	3236	2	2	0	1	0	0	0	1	1	1	0	1	1	0	0	1	0	0	0	0	0	1	1	4
687	0	29	2	1	160	61	23.8281	4	3	1	3296	2	1	0	0	0	0	1	1	1	0	1	0	0	1	1	1	0	0	1	0	1	0	1	1
688	0	30	3	2	165	55	20.202	2	2	1	2759	1	2	0	1	0	1	1	1	1	1	1	1	1	1	1	1	1	0	0	0	1	0	0	2
689	0	64	5	1	156	59	24.2439	2	2	1	2512	1	1	1	1	1	1	1	1	0	1	1	0	1	1	1	1	1	1	1	0	1	1	0	4
690	0	42	4	2	163	62	23.3355	2	2	1	2740	1	1	0	1	1	1	0	0	0	0	0	1	1	1	1	1	1	0	0	0	1	1	0	3
691	0	29	2	1	178	81	25.565	4	3	1	3183	2	2	0	1	0	1	0	0	0	0	0	0	0	0	1	1	1	1	1	0	1	1	1	1
692	0	69	5	1	155	66	27.4714	2	2	1	3343	2	2	0	1	0	0	1	1	0	0	0	0	1	0	1	0	1	1	0	0	1	0	0	1
693	0	29	2	2	171	63	21.5451	4	3	1	4087	4	2	1	0	0	0	0	0	0	0	1	1	1	0	0	1	0	0	1	0	0	1	1	1
694	0	18	1	1	158	67	26.8386	1	1	1	3598	3	2	1	1	0	0	0	0	1	0	1	0	0	0	0	1	1	0	1	0	0	1	1	3
695	0	39	3	1	174	66	21.7994	4	3	1	3931	3	2	0	0	0	0	0	0	1	1	0	0	1	1	0	0	1	1	0	0	0	0	0	4
696	0	40	3	2	167	64	22.9481	2	2	1	3784	3	1	0	0	0	0	0	1	1	0	1	1	1	0	0	0	1	1	1	0	0	0	1	1
697	0	18	2	1	173	67	22.3863	1	1	1	3448	2	2	0	1	0	1	0	0	1	1	1	1	0	1	1	0	0	1	1	0	0	1	1	1
698	0	79	3	1	165	56	20.5693	4	3	1	3915	3	2	1	0	0	0	0	1	1	1	0	0	0	0	1	1	0	0	1	0	0	1	0	2
699	0	36	3	2	163	68	25.5937	2	2	1	3095	2	1	0	1	1	0	0	1	0	1	1	1	1	0	1	1	0	0	1	0	1	0	1	3
700	0	18	1	2	171	83	28.3848	3	2	1	2987	1	1	0	1	1	0	0	1	1	0	0	0	0	1	0	1	1	0	1	0	1	0	0	2
701	0	18	1	2	176	84	27.1178	1	1	1	3012	2	2	1	0	0	1	0	0	1	0	0	1	0	0	0	1	1	1	1	0	0	0	1	3
702	0	31	3	2	164	71	26.398	2	2	1	2558	1	1	0	1	1	0	1	1	1	0	1	1	1	1	1	0	1	0	1	0	1	1	0	4
703	0	40	3	1	172	64	21.6333	4	3	1	3711	3	2	0	0	1	0	0	0	1	0	1	1	0	1	1	1	1	0	1	0	1	1	1	4
704	0	18	1	1	157	63	25.5588	1	1	1	3697	3	1	0	0	1	0	0	1	0	0	1	1	1	1	0	0	0	1	1	0	1	1	1	3
705	0	49	4	1	177	80	25.5354	2	2	1	3334	2	2	0	1	0	1	0	0	0	1	0	1	1	0	1	0	1	0	1	0	0	1	1	3
706	0	29	2	1	161	59	22.7615	4	3	1	3550	3	2	1	0	1	0	1	0	1	0	0	1	1	1	0	1	0	0	0	0	0	0	0	3
707	0	64	5	1	163	51	19.1953	2	2	1	3383	2	1	1	0	0	1	1	0	0	0	1	0	1	1	1	1	0	1	0	0	0	1	1	4
708	0	32	3	2	166	50	18.1449	2	2	1	2589	1	2	0	0	1	1	0	1	0	0	1	0	0	0	0	0	0	1	1	0	0	1	1	1
709	0	53	5	1	168	55	19.487	2	2	1	4366	4	2	1	1	1	0	1	0	0	0	0	1	1	0	0	0	0	0	0	0	0	0	1	3
710	0	39	3	1	177	67	21.3859	4	3	1	3877	3	2	0	1	1	1	0	0	1	1	0	0	1	1	0	0	1	0	1	0	1	1	1	2
711	0	18	2	1	163	59	22.2063	4	3	1	3466	2	1	1	0	1	1	1	1	1	0	1	1	0	1	1	1	0	0	1	0	0	1	0	2
712	0	17	1	2	174	85	28.075	1	1	1	3311	2	2	1	1	0	0	0	1	0	1	0	1	1	0	1	1	1	0	1	0	1	0	0	3
713	0	30	2	1	178	80	25.2493	4	3	1	3616	3	2	1	0	0	1	1	1	1	0	0	1	0	0	1	1	1	0	0	0	0	0	1	3
714	0	79	4	1	158	53	21.2306	2	2	1	3708	3	1	1	1	1	1	0	0	1	1	0	0	1	0	1	0	0	1	1	0	1	1	0	2
715	0	18	1	2	155	51	21.2279	1	1	1	3894	3	1	0	0	1	1	0	1	1	1	0	1	0	1	0	1	0	1	0	0	1	0	0	1
716	0	78	5	2	160	54	21.0938	1	1	1	3675	3	1	0	0	0	1	1	0	1	0	1	0	0	1	1	1	1	0	1	0	1	1	0	1
717	0	31	3	2	177	68	21.7051	2	2	1	2995	1	2	0	1	0	1	0	0	0	0	1	1	0	0	0	0	1	0	1	0	0	0	0	3
718	0	33	3	1	157	51	20.6905	2	2	1	2751	1	2	1	0	1	1	1	1	0	1	1	1	1	0	1	0	1	1	1	0	0	0	0	4
719	0	17	2	2	169	73	25.5593	4	3	1	2667	1	2	1	0	0	1	1	1	0	0	1	1	0	0	1	0	1	1	0	0	1	1	1	2
720	0	50	4	1	158	60	24.0346	1	1	1	3883	3	2	0	0	1	0	0	0	0	1	1	0	0	1	0	1	0	0	1	0	1	1	0	4
721	0	49	4	1	166	62	22.4996	2	2	1	3006	2	1	0	1	0	1	1	0	0	1	1	1	1	0	1	0	1	0	1	0	1	1	0	3
722	0	29	2	1	168	63	22.3214	4	3	1	3027	2	1	1	1	1	1	0	0	0	1	0	1	1	1	0	0	1	1	0	0	1	1	1	1
723	0	19	2	1	174	62	20.4783	3	2	1	4150	4	2	0	1	1	1	1	1	0	0	1	0	1	1	0	1	1	0	0	0	1	1	1	4
724	0	30	2	1	177	81	25.8546	4	3	1	3021	2	1	1	0	0	0	0	0	1	1	0	0	1	1	1	1	1	1	1	0	1	1	0	4
725	0	29	2	1	166	72	26.1286	1	1	1	3645	3	1	0	0	1	1	1	0	0	1	1	1	1	0	0	1	0	1	1	0	1	0	1	4
726	0	18	1	1	163	58	21.83	3	2	1	2954	1	1	1	0	0	0	1	1	1	1	1	0	1	0	0	1	1	1	0	0	1	1	1	1
727	0	50	5	1	166	71	25.7657	2	2	1	4018	4	2	0	0	0	0	0	0	0	1	0	1	0	1	1	1	0	0	0	0	0	1	1	1
728	0	39	3	2	166	67	24.3141	1	1	1	3868	3	2	0	1	1	0	0	0	1	0	0	0	0	1	1	1	0	0	1	0	0	0	1	2
729	0	65	5	1	157	67	27.1816	1	1	1	3309	2	1	0	1	1	0	1	0	0	0	0	1	1	0	0	0	0	0	1	0	0	0	0	4
730	0	29	2	2	175	87	28.4082	1	1	1	3605	3	1	0	1	1	0	0	0	0	1	1	1	1	0	0	0	0	0	0	0	1	1	1	2
731	0	29	2	1	166	72	26.1286	3	2	1	4188	4	2	1	1	0	0	1	0	1	0	0	1	1	1	1	1	1	0	0	0	0	1	1	2
732	0	40	3	2	174	68	22.46	2	2	1	3619	3	2	0	1	1	0	0	1	1	0	1	0	0	0	1	1	0	1	0	0	1	0	0	2
733	0	45	4	2	167	60	21.5139	3	2	1	2577	1	1	1	0	1	0	0	0	0	0	0	1	0	1	0	1	0	0	0	0	0	0	0	3
734	0	34	3	2	175	59	19.2653	3	2	1	3180	2	1	1	1	0	0	1	0	0	1	1	1	0	0	1	1	0	0	1	0	0	0	0	1
735	0	50	4	1	157	48	19.4734	3	2	1	3677	3	2	0	0	1	0	1	1	0	1	1	1	0	0	1	0	1	1	1	0	1	0	0	2
736	0	63	5	2	171	52	17.7832	3	2	1	4407	4	2	0	1	0	0	1	1	0	0	0	1	0	0	0	1	1	1	1	0	1	0	0	1
737	0	18	1	1	175	66	21.551	3	2	1	3315	2	2	0	0	0	1	1	0	1	1	0	0	1	1	0	0	0	0	1	0	1	0	1	4
738	0	18	2	1	163	71	26.7229	3	2	1	3410	2	1	1	1	0	0	1	1	1	0	1	0	0	0	0	1	1	0	0	0	0	1	1	4
739	0	29	2	2	168	70	24.8016	3	2	1	4242	4	2	1	1	0	1	0	1	1	1	0	0	0	0	0	0	1	0	0	0	0	1	1	1
740	0	56	5	1	172	66	22.3094	3	2	1	4466	4	2	0	1	0	0	0	0	1	1	1	1	0	0	0	0	1	0	1	0	1	0	1	1
741	0	58	5	1	171	75	25.6489	3	2	1	3442	2	1	1	1	1	1	1	1	1	0	1	1	0	0	1	1	1	0	0	0	0	1	0	3
742	0	17	1	1	162	73	27.8159	3	2	1	2772	1	1	1	1	0	1	1	1	1	1	0	1	1	0	1	0	1	1	1	0	0	0	1	2
743	0	39	3	1	161	52	20.061	3	2	1	3971	3	2	0	0	1	0	1	0	1	0	0	0	1	1	0	0	0	1	1	0	0	0	0	2
744	0	22	2	2	169	64	22.4082	1	1	1	2896	1	2	0	1	0	1	0	0	0	0	1	1	1	1	1	1	0	0	0	0	0	0	1	3
745	0	50	4	1	159	63	24.9199	3	2	1	3816	3	2	1	1	0	0	1	0	0	1	1	1	1	1	0	1	0	0	1	0	0	1	1	3
746	0	44	4	1	171	61	20.8611	3	2	1	2738	1	1	0	0	0	0	0	1	1	1	0	1	0	1	0	0	1	0	1	0	0	1	1	3
747	0	29	2	2	176	68	21.9525	3	2	1	4490	4	2	1	0	1	0	0	0	0	1	1	1	0	1	0	0	0	0	1	0	0	1	0	1
748	0	39	3	1	178	86	27.143	3	2	1	3381	2	1	1	0	0	1	0	0	0	0	1	0	0	0	1	0	1	1	0	0	1	0	1	4
749	0	39	3	1	163	67	25.2174	3	2	1	3750	3	2	0	1	1	0	1	0	0	1	1	0	0	1	1	0	0	1	0	0	0	1	0	2
750	0	49	4	2	160	48	18.75	3	2	1	2975	1	2	1	0	0	0	0	0	0	0	0	1	0	1	1	1	0	1	0	0	0	1	0	4
751	0	39	3	1	162	56	21.3382	3	2	1	3686	3	2	1	1	0	0	0	1	1	1	0	1	0	0	0	1	1	0	0	0	0	0	0	1
752	0	53	5	1	164	74	27.5134	3	2	1	2648	1	2	0	1	1	0	1	1	0	1	0	1	1	0	1	1	1	1	0	0	0	1	0	1
753	0	32	3	1	174	61	20.148	3	2	1	4426	4	2	1	1	0	1	1	0	0	0	0	0	0	0	0	0	0	0	1	0	1	0	0	1
754	0	18	1	1	162	55	20.9572	3	2	1	2987	1	1	1	0	0	0	0	0	0	1	1	1	0	1	1	0	1	1	1	0	1	0	0	1
755	0	28	2	1	167	69	24.7409	1	1	1	3620	3	2	0	0	1	0	0	0	0	1	0	0	0	0	0	0	0	1	0	0	1	0	0	1
756	0	18	1	1	173	65	21.7181	1	1	1	3652	3	2	0	0	1	1	0	0	1	1	0	1	0	1	0	0	0	1	1	0	0	1	1	3
757	0	18	1	1	162	51	19.433	3	2	1	3681	3	2	1	1	1	0	1	1	0	1	1	1	0	0	1	1	0	0	0	0	1	1	0	4
758	0	30	2	1	158	48	19.2277	3	2	1	3900	3	2	0	1	1	1	0	1	0	0	1	1	0	0	0	0	1	0	0	0	1	0	1	1
759	0	49	4	1	156	52	21.3675	2	2	1	3043	2	2	1	0	0	0	1	1	0	1	1	0	1	1	0	1	1	1	1	0	1	1	0	3
760	0	29	2	1	166	65	23.5883	4	3	1	3201	2	2	1	1	0	1	0	1	1	0	1	0	1	0	1	1	0	1	1	0	1	0	1	1
761	0	18	1	1	157	44	17.8506	1	1	1	3830	3	2	1	0	0	1	1	1	0	0	1	0	0	0	0	1	0	0	0	0	1	0	0	2
762	0	39	3	1	160	55	21.4844	4	3	1	3729	3	2	1	1	0	0	0	0	1	0	0	1	0	1	1	1	0	0	0	0	0	1	0	4
763	0	18	1	1	166	69	25.0399	1	1	1	3857	3	1	1	1	0	1	0	1	1	0	1	0	0	1	1	1	1	1	1	0	1	1	0	1
764	0	50	4	1	160	47	18.3594	1	1	1	3682	3	1	1	0	1	0	0	0	1	0	1	1	0	1	1	1	1	1	0	0	1	0	1	4
765	0	59	5	2	169	67	23.4586	2	2	1	4109	4	2	1	1	1	1	1	1	0	1	1	1	0	0	0	0	1	1	1	0	1	0	1	1
766	0	18	1	1	165	64	23.5078	3	2	1	2558	1	1	0	1	0	1	0	0	0	1	0	0	0	0	1	1	1	1	1	0	1	1	0	1
767	0	53	5	1	165	59	21.6713	3	2	1	2939	1	2	1	1	1	0	1	0	0	0	1	1	1	1	1	1	1	1	1	0	0	0	1	2
768	0	61	5	1	170	68	23.5294	1	1	1	4131	4	1	0	0	0	1	1	0	0	0	1	1	0	0	1	1	0	1	1	0	1	0	1	3
769	0	37	3	1	175	64	20.898	3	2	1	3177	2	2	1	0	0	1	1	0	1	1	1	0	0	0	0	0	0	0	0	0	1	0	0	3
770	0	38	3	2	163	48	18.0662	3	2	1	3215	2	2	1	0	1	1	1	0	1	0	1	0	1	0	1	0	1	1	0	0	0	0	0	3
771	0	50	4	1	169	77	26.9598	3	2	1	3697	3	2	0	1	1	1	0	0	0	0	1	0	0	1	0	1	1	1	1	0	0	0	0	3
772	0	39	3	1	159	53	20.9644	3	2	1	3918	3	2	0	0	0	0	1	0	1	0	0	1	0	0	0	0	0	1	0	0	0	1	0	2
773	0	29	2	1	172	66	22.3094	3	2	1	3704	3	2	0	0	0	0	1	0	0	0	1	1	1	1	1	1	0	0	1	0	0	0	1	4
774	0	14	1	1	140	48	24.4898	3	2	1	2739	1	1	1	1	0	1	1	0	0	0	0	1	0	1	0	1	1	1	1	0	1	0	0	2
775	0	49	4	1	160	66	25.7812	1	1	1	3446	2	2	0	1	0	1	0	0	0	0	0	1	0	0	0	0	1	1	1	0	0	1	1	3
776	0	41	4	1	173	74	24.7252	3	2	1	2851	1	1	1	0	0	0	1	0	0	1	0	1	0	1	0	0	1	1	1	0	1	0	1	1
777	0	63	5	2	172	73	24.6755	2	2	1	3295	2	1	0	1	0	0	0	1	0	1	1	0	0	0	0	0	0	1	1	0	0	1	0	2
778	0	30	2	1	162	68	25.9107	4	3	1	3297	2	1	1	0	1	1	0	1	1	0	1	0	1	1	0	1	1	0	1	0	1	0	0	4
779	0	76	1	2	165	49	17.9982	1	1	1	3567	3	2	0	0	0	1	1	0	0	0	0	0	0	1	1	1	1	0	1	0	1	1	1	2
780	0	53	5	2	164	68	25.2826	1	1	1	2669	1	1	0	1	1	1	1	0	1	0	0	1	0	1	1	0	0	1	1	0	0	1	0	2
781	0	39	3	2	164	74	27.5134	1	1	1	3657	3	2	0	1	0	1	1	0	1	1	1	1	1	1	1	0	0	0	0	0	0	0	0	2
782	0	29	2	1	175	81	26.449	4	3	1	3601	3	2	1	0	0	1	0	1	0	0	1	0	0	0	1	0	0	0	0	0	1	1	1	2
783	0	39	3	1	156	59	24.2439	4	3	1	3795	3	2	0	1	0	0	1	0	0	1	0	0	0	0	0	1	1	0	1	0	1	1	0	2
784	0	54	5	1	173	63	21.0498	2	2	1	2953	1	1	1	0	1	0	0	1	1	0	0	0	1	0	1	0	1	1	1	0	1	1	0	3
785	0	49	4	1	168	74	26.2188	2	2	1	3228	2	2	1	1	0	0	0	0	0	1	1	0	1	0	0	0	1	1	1	0	1	0	0	3
786	0	18	1	1	175	72	23.5102	1	1	1	3810	3	2	1	0	0	0	0	0	0	1	1	1	0	0	0	1	0	0	0	0	1	1	1	1
787	0	18	1	1	173	64	21.3839	1	1	1	3438	2	2	1	0	0	0	1	1	0	1	0	1	1	0	1	1	1	1	1	0	1	1	1	1
788	0	49	4	1	168	60	21.2585	1	1	1	3153	2	1	0	0	0	0	1	0	1	1	1	1	0	1	0	0	0	0	0	0	1	1	0	3
789	0	13	1	1	160	53	20.7031	3	2	1	2653	1	1	1	0	0	0	0	0	1	1	1	0	0	0	1	0	0	1	1	0	1	1	0	3
790	0	72	5	2	163	58	21.83	2	2	1	3683	3	1	0	0	1	0	1	0	0	1	0	0	0	0	0	0	1	1	1	0	1	1	0	1
791	0	38	3	1	169	64	22.4082	2	2	1	3212	2	2	0	1	1	1	1	0	1	0	0	0	0	0	1	1	0	1	0	0	0	1	0	3
792	0	76	1	1	176	65	20.984	1	1	1	3711	3	1	1	1	0	0	0	0	1	1	1	1	1	1	0	1	0	1	1	0	1	0	1	4
793	0	29	2	1	174	59	19.4874	4	3	1	3544	3	1	1	0	1	0	0	1	0	1	0	0	1	1	0	1	0	1	0	0	0	1	0	2
794	0	18	1	1	171	81	27.7008	1	1	1	3559	3	2	1	1	0	1	1	0	0	1	1	0	0	1	1	0	0	0	0	0	1	1	0	4
795	0	53	5	2	178	68	21.4619	2	2	1	4346	4	2	1	0	0	1	0	1	1	0	0	0	1	1	0	0	1	0	0	0	1	1	1	3
796	0	33	3	1	171	73	24.9649	2	2	1	2962	1	1	0	0	0	1	1	1	1	1	0	1	0	1	0	1	0	1	1	0	0	0	0	1
797	0	13	1	1	144	37	17.8434	3	2	1	2991	1	1	0	0	1	0	0	0	1	1	1	1	0	1	1	1	1	0	1	0	1	0	0	4
798	0	19	2	1	162	64	24.3865	3	2	1	4070	4	2	0	1	0	0	0	0	0	1	0	0	1	1	0	1	0	1	1	0	0	0	1	1
799	0	45	4	2	171	81	27.7008	3	2	1	2962	1	2	1	1	0	0	1	1	1	1	1	0	0	0	0	0	0	0	1	0	1	0	0	3
800	0	31	3	2	172	69	23.3234	3	2	1	2581	1	1	1	1	1	1	0	1	0	0	1	1	1	1	0	1	0	0	0	0	0	1	0	1
801	0	76	1	1	161	60	23.1473	3	2	1	3968	3	1	1	0	0	0	1	0	1	1	1	1	0	1	0	0	0	1	0	0	0	1	1	4
802	0	38	3	1	163	52	19.5717	3	2	1	3444	2	2	1	1	1	0	0	0	1	0	1	1	0	1	1	0	1	1	0	0	0	0	1	4
803	0	32	3	1	161	55	21.2183	3	2	1	3328	2	1	0	1	0	1	1	0	0	0	1	1	1	0	1	0	0	0	1	0	0	1	1	1
804	0	44	4	1	158	55	22.0317	1	1	1	3198	2	2	0	0	1	0	0	0	0	0	1	0	1	0	1	1	1	1	1	0	0	1	1	2
805	0	18	2	1	157	60	24.3418	3	2	1	4040	4	1	0	0	1	1	0	1	0	1	1	1	1	1	0	0	1	0	0	0	1	1	0	4
806	0	18	1	1	170	70	24.2215	1	1	1	3094	2	2	0	0	1	1	0	1	1	1	0	0	1	1	1	1	1	1	1	0	1	1	1	1
807	0	63	5	1	168	61	21.6128	2	2	1	3461	2	2	1	0	0	1	0	0	0	1	0	0	0	0	1	0	0	1	0	0	1	0	0	3
808	0	29	2	1	166	63	22.8625	1	1	1	3269	2	2	0	0	0	0	1	0	1	1	1	1	1	0	1	1	1	1	0	0	1	1	0	1
809	0	20	2	2	162	66	25.1486	1	1	1	4122	4	2	0	1	1	1	1	0	1	0	1	0	1	1	0	0	1	0	1	0	0	0	0	4
810	0	42	4	2	159	51	20.1733	2	2	1	3258	2	1	1	1	1	0	1	0	1	1	1	1	0	1	1	1	0	0	1	0	1	1	0	1
811	0	39	3	2	175	56	18.2857	2	2	1	3706	3	2	0	1	0	1	1	1	0	1	0	0	0	0	1	1	1	1	0	0	0	0	0	4
812	0	39	3	2	165	52	19.1001	2	2	1	3979	3	2	1	1	0	1	0	1	1	0	0	1	0	1	0	0	1	1	0	0	0	0	0	3
813	0	49	4	1	174	66	21.7994	2	2	1	3100	2	2	0	0	0	0	0	1	1	1	0	1	1	1	0	0	1	0	0	0	0	1	1	2
814	0	18	1	2	174	60	19.8177	1	1	1	3122	2	2	1	0	1	1	1	1	1	0	0	1	1	0	0	0	1	1	1	0	1	1	0	3
815	0	39	3	2	162	60	22.8624	3	2	1	3819	3	2	0	1	1	0	0	1	1	0	0	0	1	0	1	0	1	1	1	0	1	0	1	3
816	0	50	4	1	167	56	20.0796	3	2	1	3713	3	2	0	1	1	0	0	0	0	0	1	0	1	1	1	0	0	1	1	0	1	0	0	2
817	0	29	2	1	177	87	27.7698	3	2	1	4020	4	1	0	1	1	0	1	0	0	0	1	0	0	0	1	1	0	1	1	0	0	0	1	2
818	0	18	1	1	161	64	24.6904	3	2	1	3464	2	2	1	1	0	1	1	0	0	1	0	0	0	0	0	1	0	0	1	0	0	1	1	2
819	0	18	1	1	159	71	28.0843	3	2	1	3434	2	2	1	0	0	1	1	1	1	1	0	1	1	0	0	0	1	0	0	0	0	0	0	2
820	0	28	2	2	157	67	27.1816	1	1	1	3786	3	2	0	0	1	1	0	0	1	0	1	0	0	0	0	0	0	0	1	0	0	1	0	4
821	0	39	3	2	160	59	23.0469	3	2	1	3413	2	2	1	0	0	1	1	0	0	1	0	0	0	0	0	0	1	0	0	0	0	1	0	2
822	0	49	4	1	169	54	18.9069	1	1	1	3377	2	2	0	1	1	1	1	0	1	1	0	0	0	0	0	0	1	0	1	0	1	0	1	2
823	0	39	3	2	164	70	26.0262	3	2	1	3628	3	2	1	1	1	1	1	1	1	0	1	0	0	0	0	1	0	0	0	0	1	0	1	2
824	0	39	3	2	177	69	22.0243	1	1	1	3741	3	1	0	0	0	0	0	0	0	1	0	0	0	0	0	1	0	1	0	0	0	0	1	3
825	0	28	2	2	175	80	26.1224	1	1	1	3596	3	2	0	0	0	1	0	0	0	0	1	1	0	1	1	0	0	0	0	0	0	0	0	1
826	0	17	1	2	169	58	20.3074	1	1	1	3413	2	2	0	0	1	0	0	1	1	1	0	0	1	1	1	0	1	1	0	0	0	0	0	2
827	0	39	3	2	171	72	24.623	2	2	1	3238	2	1	1	1	1	1	0	0	1	1	1	1	0	0	0	1	0	1	1	0	0	1	1	1
828	0	13	1	2	130	37	21.8935	1	1	1	2701	1	2	0	1	0	0	0	0	1	1	0	0	0	1	1	1	0	1	0	0	0	0	0	4
829	0	39	3	2	167	55	19.721	2	2	1	3875	3	1	0	0	1	1	1	0	0	1	0	1	0	0	1	0	0	0	1	0	1	1	0	4
830	0	29	2	1	165	59	21.6713	1	1	1	3778	3	2	0	1	0	0	0	0	1	0	1	1	0	1	0	0	1	0	0	0	0	1	1	2
831	0	29	2	2	169	57	19.9573	4	3	1	4086	4	2	1	1	0	1	1	1	0	1	0	1	0	0	0	1	1	1	1	0	1	0	1	1
832	0	18	1	1	173	66	22.0522	1	1	1	3797	3	2	1	1	1	0	0	1	1	1	1	1	0	0	0	1	0	0	0	0	0	0	1	4
833	0	18	1	2	160	53	20.7031	1	1	1	3159	2	2	0	1	0	0	1	1	1	1	1	0	0	1	1	1	1	1	1	0	0	0	0	3
834	0	18	1	1	158	62	24.8358	1	1	1	3650	3	2	0	0	1	0	0	1	0	0	1	0	1	0	0	1	1	1	1	0	0	0	0	2
835	0	50	4	1	168	58	20.5499	2	2	1	3681	3	2	0	0	0	0	1	0	0	1	1	1	1	1	1	0	1	1	1	0	0	1	0	2
836	0	32	3	1	174	85	28.075	2	2	1	3381	2	2	0	0	1	0	0	0	0	1	1	0	1	0	1	1	0	1	1	0	1	1	1	3
837	0	37	3	2	157	55	22.3133	2	2	1	2700	1	2	1	0	0	1	1	1	1	0	0	0	1	0	0	1	0	0	1	0	0	0	1	1
838	0	18	1	2	160	67	26.1719	1	1	1	3506	3	2	0	0	1	1	0	0	1	1	1	1	0	0	0	0	1	1	1	0	0	1	1	4
839	0	69	5	1	170	76	26.2976	2	2	1	3163	2	1	0	1	0	1	1	1	1	1	0	1	1	1	1	1	1	0	0	0	1	1	0	3
840	0	39	3	2	161	61	23.533	2	2	1	3973	3	1	0	1	1	0	0	0	1	0	0	1	0	0	1	1	1	1	1	0	0	1	0	2
841	0	39	3	1	171	75	25.6489	4	3	1	3911	3	2	0	1	1	1	0	1	1	1	0	1	0	0	0	0	1	1	0	0	1	0	0	1
842	0	49	4	1	177	81	25.8546	2	2	1	3000	2	2	0	1	1	0	0	0	1	0	0	0	0	0	1	0	0	1	0	0	1	0	0	3
843	0	18	1	1	161	71	27.3909	1	1	1	3676	3	2	1	1	0	0	1	0	1	1	0	0	0	0	0	0	1	0	0	0	1	0	0	1
844	0	63	5	2	174	69	22.7903	2	2	1	3377	2	1	1	1	0	0	0	0	0	0	1	0	1	1	1	1	1	1	1	0	0	1	1	1
845	0	17	1	2	172	65	21.9713	1	1	1	3029	2	2	0	0	0	0	1	1	1	0	1	1	0	1	1	1	0	1	0	0	1	0	0	3
846	0	28	2	1	172	75	25.3515	1	1	1	3875	3	2	0	1	0	1	0	0	1	0	1	0	0	1	1	0	1	0	0	0	0	0	0	3
847	0	58	5	2	155	65	27.0552	1	1	1	2907	1	1	0	0	1	1	1	0	1	0	1	0	1	1	1	1	0	1	0	0	0	0	0	4
848	0	31	3	2	176	84	27.1178	2	2	1	2681	1	1	1	1	1	0	1	1	1	0	1	0	1	0	1	0	1	0	1	0	0	1	0	2
849	0	29	2	1	169	72	25.2092	4	3	1	3540	3	2	1	0	1	0	0	1	1	1	0	0	0	1	0	1	0	0	0	0	0	0	1	3
850	0	18	1	2	165	63	23.1405	3	2	1	3166	2	1	1	1	0	1	1	0	0	1	0	0	0	1	0	1	0	1	0	0	0	0	1	2
851	0	39	3	1	157	46	18.662	2	2	1	3322	2	2	1	1	0	1	1	1	0	0	1	0	1	0	0	0	0	1	1	0	1	1	1	1
852	0	12	1	1	162	60	22.8624	1	1	1	3288	2	2	0	0	1	0	1	0	0	0	1	0	0	1	0	0	0	0	1	0	1	1	0	4
853	0	39	3	2	171	60	20.5191	2	2	1	3001	2	2	1	0	1	1	1	1	0	0	1	1	0	1	1	1	0	0	0	0	0	1	0	4
854	0	29	2	2	172	63	21.2953	4	3	1	3691	3	1	0	1	1	1	1	0	1	0	1	0	0	0	1	0	1	0	1	0	1	0	1	1
855	0	29	2	2	168	74	26.2188	4	3	1	3861	3	2	1	1	0	0	0	0	1	0	0	0	0	0	0	0	0	0	1	0	1	1	1	4
856	0	50	4	1	158	66	26.4381	2	2	1	3595	3	1	0	1	1	0	1	1	0	1	1	1	1	0	0	0	1	1	1	0	1	0	1	3
857	0	29	2	1	176	72	23.2438	4	3	1	3634	3	2	0	1	0	0	1	0	0	0	0	0	1	0	0	1	1	0	1	0	0	1	0	2
858	0	29	2	1	157	63	25.5588	4	3	1	3161	2	1	0	0	0	1	0	0	1	0	0	0	0	1	1	0	1	0	0	0	0	1	1	1
859	0	36	3	2	176	82	26.4721	2	2	1	3059	2	2	1	1	0	1	1	0	0	0	1	1	1	0	0	0	0	0	0	0	1	1	1	1
860	0	50	4	1	170	64	22.1453	2	2	1	3899	3	2	0	0	1	0	1	0	0	1	1	1	0	0	0	1	0	1	0	0	1	0	0	2
861	0	39	3	1	170	72	24.9135	1	1	1	3630	3	2	0	0	0	0	0	0	1	0	0	0	1	0	1	0	0	1	0	0	0	0	0	2
862	0	18	1	1	172	67	22.6474	1	1	1	3031	2	1	0	0	0	0	0	1	0	1	0	1	1	1	0	1	1	0	1	0	1	1	1	4
863	0	75	1	2	174	64	21.1389	1	1	1	3904	3	2	1	1	0	1	1	0	1	0	1	0	0	1	0	1	1	1	0	0	1	1	0	3
864	0	29	2	1	173	54	18.0427	4	3	1	3902	3	2	1	1	0	0	0	1	1	0	1	0	0	0	0	1	1	1	1	0	1	0	0	2
865	0	29	2	2	175	73	23.8367	3	2	1	4239	4	2	1	0	1	0	0	0	0	0	0	0	0	1	1	0	0	0	1	0	0	0	1	4
866	0	47	4	2	161	66	25.462	2	2	1	3151	2	1	1	0	0	1	1	1	1	0	1	0	0	1	1	1	0	1	0	0	1	1	0	1
867	0	29	2	2	168	69	24.4473	4	3	1	3307	2	2	0	1	1	0	1	0	0	1	1	1	0	0	1	1	1	0	1	0	0	0	0	2
868	0	50	4	1	168	76	26.9274	2	2	1	3928	3	2	0	1	1	1	0	0	1	0	1	0	1	0	1	1	1	0	0	0	1	1	1	4
869	0	39	3	2	171	58	19.8352	2	2	1	3737	3	1	1	0	1	1	0	0	1	0	1	1	0	1	1	1	1	1	1	0	1	1	0	3
870	0	40	3	1	162	73	27.8159	4	3	1	3849	3	2	0	0	1	1	1	1	0	0	1	1	0	0	0	0	1	0	0	0	0	1	1	2
871	0	56	5	2	174	61	20.148	2	2	1	3464	2	2	0	0	1	0	0	0	0	0	0	1	0	0	0	1	0	1	1	0	0	1	0	3
872	0	39	3	1	169	69	24.1588	2	2	1	3734	3	1	1	1	0	0	1	0	0	0	1	0	0	1	1	1	0	0	0	0	0	1	0	3
873	0	69	5	1	174	85	28.075	2	2	1	3477	2	2	0	1	1	0	1	1	1	1	1	0	1	0	1	0	1	1	0	0	0	0	0	3
874	0	29	2	2	172	66	22.3094	1	1	1	3281	2	1	0	0	0	0	0	0	1	0	1	1	1	1	0	0	1	1	0	0	1	1	0	1
875	0	39	3	1	170	52	17.9931	4	3	1	3565	3	2	1	0	1	0	1	1	0	1	0	0	0	0	0	0	0	1	0	0	0	0	0	4
876	0	53	5	2	167	66	23.6652	2	2	1	2581	1	2	0	1	1	0	1	0	1	0	1	0	0	1	1	1	0	0	1	0	1	1	0	2
877	0	47	4	2	172	67	22.6474	2	2	1	3195	2	1	1	1	1	1	0	0	0	0	0	1	0	0	1	1	1	0	0	0	1	0	0	2
878	0	60	5	2	156	66	27.1203	2	2	1	3483	2	1	1	0	0	1	1	1	1	0	0	0	0	0	1	0	1	0	1	0	1	0	0	1
879	0	68	5	1	160	56	21.875	1	1	1	4094	4	2	0	1	1	1	1	0	0	1	1	0	1	0	0	0	0	1	0	0	1	0	1	1
880	0	29	2	2	170	74	25.6055	3	2	1	3459	2	1	0	1	1	1	1	0	0	0	0	1	0	0	1	1	0	1	1	0	0	0	0	4
881	0	39	3	1	158	59	23.634	3	2	1	3504	3	1	1	1	1	1	0	1	0	1	0	1	0	0	1	0	1	1	1	0	0	1	1	2
882	0	39	3	1	173	64	21.3839	1	1	1	3419	2	2	0	0	0	0	0	0	0	1	0	0	1	1	1	1	0	1	1	0	0	1	0	4
883	0	39	3	2	178	90	28.4055	3	2	1	3631	3	1	0	0	0	0	1	1	1	0	0	0	1	0	0	1	1	1	1	0	0	1	0	4
884	0	39	3	2	176	75	24.2123	3	2	1	3924	3	2	0	1	1	0	0	0	1	0	0	0	0	1	0	1	0	1	0	0	0	0	0	2
885	0	29	2	2	169	53	18.5568	3	2	1	3097	2	1	1	0	0	0	0	1	0	1	1	0	0	0	0	0	0	0	0	0	1	1	1	2
886	0	68	5	1	161	72	27.7767	3	2	1	3204	2	2	1	0	1	0	0	0	0	0	1	1	1	1	0	0	1	0	1	0	0	0	1	1
887	0	18	1	2	167	51	18.2868	3	2	1	3987	3	2	0	0	0	1	1	1	1	1	1	1	1	0	0	0	1	1	1	0	1	0	0	3
888	0	44	4	2	178	81	25.565	3	2	1	2778	1	1	1	0	1	1	1	1	0	1	1	0	1	1	0	1	0	1	1	0	0	0	1	3
889	0	38	3	2	158	61	24.4352	3	2	1	3461	2	2	1	1	0	1	1	1	0	1	1	1	0	1	0	0	1	1	1	0	1	1	1	1
890	0	39	3	1	163	57	21.4536	3	2	1	3561	3	2	0	1	0	1	0	0	1	0	1	0	1	0	1	0	0	0	1	0	0	0	1	4
891	0	29	2	2	168	60	21.2585	1	1	1	4134	4	2	0	0	1	0	0	0	1	1	0	1	0	0	0	0	0	1	1	0	1	0	1	4
892	0	50	4	1	162	63	24.0055	3	2	1	3978	3	1	0	1	1	0	1	1	1	0	0	1	1	1	0	0	1	1	0	0	0	1	1	1
893	0	30	2	1	165	69	25.3444	3	2	1	3031	2	2	0	0	0	0	0	0	1	1	1	1	1	0	1	1	1	1	1	0	0	0	1	1
894	0	18	1	2	159	55	21.7555	3	2	1	3030	2	2	1	0	1	0	0	0	1	1	0	0	0	1	0	0	0	0	0	0	0	0	1	3
895	0	56	5	2	161	56	21.6041	3	2	1	2987	1	2	1	0	0	0	1	0	0	1	1	1	1	1	0	0	0	0	0	0	0	0	0	1
896	0	51	5	2	175	67	21.8776	3	2	1	4310	4	2	0	0	1	0	1	0	0	0	1	1	0	1	0	0	0	0	0	0	0	1	1	3
897	0	39	3	1	157	56	22.719	3	2	1	3717	3	2	0	1	0	0	0	1	0	1	1	0	1	1	1	0	0	0	0	0	0	0	1	3
898	0	21	2	1	178	63	19.8839	3	2	1	3349	2	1	0	1	1	1	0	0	0	1	1	0	1	1	1	1	1	1	1	0	0	1	0	4
899	0	18	1	1	172	63	21.2953	3	2	1	3929	3	2	1	0	0	0	1	0	0	1	0	0	0	0	0	0	0	1	1	0	1	0	0	4
900	0	18	1	2	171	63	21.5451	3	2	1	3897	3	1	0	0	0	1	1	1	0	1	1	1	0	0	0	1	1	1	1	0	0	1	1	1
901	0	18	1	2	171	62	21.2031	3	2	1	2856	1	2	0	1	1	0	1	0	1	0	1	0	1	1	1	0	1	0	0	0	1	1	0	1
902	0	49	4	2	169	73	25.5593	3	2	1	3483	2	1	1	0	1	0	1	0	1	0	1	1	1	1	0	0	0	0	1	0	0	0	1	3
903	0	50	5	2	161	56	21.6041	2	2	1	3395	2	2	0	1	0	0	1	0	1	0	1	1	0	1	1	0	1	0	1	0	0	0	1	4
904	0	58	5	1	175	72	23.5102	3	2	1	4156	4	2	0	1	0	0	0	0	0	0	1	0	0	0	0	1	0	0	1	0	0	1	0	3
905	0	50	4	1	176	87	28.0863	3	2	1	3573	3	1	1	1	0	1	1	0	1	0	1	0	0	0	1	1	0	0	0	0	0	1	0	3
906	0	18	1	2	156	46	18.902	1	1	1	3702	3	2	1	0	1	0	0	0	1	0	1	1	0	1	1	0	1	1	0	0	1	0	0	2
907	0	39	3	1	163	64	24.0882	1	1	1	3511	3	2	0	0	0	1	0	0	0	1	0	0	1	1	0	0	0	0	1	0	1	0	0	3
908	0	18	1	2	166	58	21.048	1	1	1	3618	3	1	0	0	1	0	0	0	1	1	0	0	0	1	1	1	0	0	0	0	0	1	0	2
909	0	36	3	2	168	76	26.9274	4	3	1	4205	4	2	0	0	0	1	1	1	0	0	1	0	1	1	1	0	0	0	1	0	1	0	0	1
910	0	34	3	2	165	56	20.5693	4	3	1	4413	4	2	0	0	1	1	0	0	0	0	1	0	0	1	0	0	0	0	1	0	0	0	0	1
911	0	39	3	2	170	74	25.6055	2	2	1	3837	3	2	1	0	1	1	1	1	1	1	0	1	0	1	1	1	1	1	0	0	0	1	0	1
912	0	39	3	1	168	54	19.1327	2	2	1	3190	2	2	1	0	0	0	0	0	1	1	1	0	1	1	1	1	1	0	0	0	1	0	0	2
913	0	56	5	2	162	71	27.0538	2	2	1	3423	2	1	0	1	1	0	1	1	0	0	0	0	0	0	0	0	1	0	0	0	1	0	0	3
914	0	53	5	2	157	44	17.8506	2	2	1	2775	1	1	0	1	1	0	0	0	0	1	1	1	1	0	0	0	0	0	0	0	1	0	0	2
915	0	76	1	1	167	62	22.231	1	1	1	3743	3	2	1	0	1	0	1	0	1	1	1	1	0	1	0	0	0	0	0	0	1	1	0	3
916	0	29	2	1	156	61	25.0657	1	1	1	3441	2	2	0	1	1	0	0	0	0	0	0	0	0	1	1	0	1	1	1	0	1	0	1	2
917	0	39	3	2	156	63	25.8876	2	2	1	3571	3	2	1	1	0	0	1	0	1	1	1	1	0	0	1	1	0	0	0	0	1	0	0	2
918	0	39	3	2	158	65	26.0375	4	3	1	3983	3	2	0	1	0	1	1	1	1	1	1	0	0	0	0	0	0	1	1	0	1	0	0	4
919	0	18	1	2	172	72	24.3375	1	1	1	3513	3	2	1	0	1	1	0	1	1	1	1	1	0	0	0	0	0	1	1	0	0	0	1	3
920	0	39	3	2	166	62	22.4996	2	2	1	3659	3	2	1	0	1	0	1	0	1	0	0	0	1	0	0	1	1	0	1	0	1	1	1	1
921	0	37	3	1	158	59	23.634	2	2	1	3055	2	2	1	1	1	0	1	0	1	0	0	0	0	1	0	1	1	0	0	0	0	1	1	2
922	0	75	1	2	164	72	26.7698	1	1	1	3836	3	1	0	0	1	0	0	1	1	1	1	0	0	0	0	0	1	0	0	0	0	0	1	2
923	0	17	1	2	173	70	23.3887	1	1	1	3120	2	1	1	1	1	1	1	0	0	0	1	0	0	1	0	1	0	1	1	0	1	1	1	2
924	0	38	3	1	171	79	27.0169	4	3	1	3160	2	2	1	0	0	0	0	1	0	0	1	1	0	0	1	1	0	0	0	0	1	0	0	4
925	0	76	1	2	161	52	20.061	1	1	1	3559	3	1	1	1	1	1	0	1	1	1	0	1	1	0	0	0	1	1	0	0	0	0	1	2
926	0	29	2	1	164	67	24.9108	4	3	1	3774	3	1	0	1	1	1	0	1	0	0	0	0	1	1	0	0	1	0	1	0	1	1	1	3
927	0	20	2	2	161	54	20.8325	4	3	1	3080	2	2	1	1	0	0	0	1	1	1	1	0	0	0	1	1	1	0	1	0	0	1	0	4
928	0	49	4	2	156	67	27.5312	2	2	1	3147	2	1	0	1	1	0	0	0	1	1	1	1	0	1	0	1	0	0	1	0	0	0	0	1
929	0	31	4	2	157	55	22.3133	2	2	1	2578	1	1	1	0	0	1	1	1	1	0	0	0	0	1	1	0	0	0	1	0	0	1	0	2
930	0	72	5	1	165	56	20.5693	1	1	1	3884	3	1	0	0	1	0	1	0	0	0	0	0	0	1	0	1	1	1	0	0	0	0	0	4
931	0	56	5	2	174	58	19.1571	2	2	1	3113	2	2	0	0	1	1	0	1	1	1	0	1	1	1	0	0	1	0	1	0	0	1	0	4
932	0	39	3	1	156	61	25.0657	1	1	1	3445	2	2	0	1	1	0	1	0	1	0	0	1	0	0	1	1	0	1	1	0	0	1	0	2
933	0	52	5	1	156	53	21.7784	2	2	1	4025	4	1	1	0	1	0	0	0	1	1	0	0	1	1	1	1	1	1	1	0	1	1	0	2
934	0	38	3	1	166	67	24.3141	4	3	1	3240	2	2	0	1	1	0	1	0	0	1	1	0	1	0	0	1	0	0	0	0	0	1	0	3
935	0	29	2	1	161	55	21.2183	3	2	1	3634	3	2	1	1	1	1	1	1	0	0	1	1	1	0	1	0	1	1	0	0	0	0	0	4
936	0	39	3	2	162	61	23.2434	3	2	1	3233	2	2	0	1	0	1	1	0	0	0	1	0	0	1	0	1	1	1	0	0	0	0	0	3
937	0	58	5	2	172	72	24.3375	3	2	1	2886	1	1	1	1	0	1	1	1	1	0	0	1	1	1	0	1	0	1	1	0	0	0	0	4
938	0	50	4	1	176	68	21.9525	3	2	1	3395	2	2	1	1	0	0	1	1	0	0	0	0	1	1	1	1	0	0	0	0	1	0	0	2
939	0	39	3	1	163	60	22.5827	3	2	1	3826	3	2	0	1	0	1	1	0	0	0	0	0	1	0	1	0	0	1	1	0	0	0	1	4
940	0	29	2	1	169	57	19.9573	3	2	1	3886	3	2	0	1	1	0	1	0	0	0	0	0	1	0	0	1	0	0	1	0	1	1	1	2
941	0	50	4	2	168	61	21.6128	2	2	1	3913	3	2	1	1	1	1	1	1	1	1	1	1	1	1	1	1	1	0	0	0	0	0	1	1
942	0	53	5	2	170	67	23.1834	3	2	1	2589	1	1	1	1	1	0	1	0	1	1	1	0	1	0	0	0	1	0	0	0	1	0	1	2
943	0	58	5	1	171	71	24.281	3	2	1	4407	4	2	0	1	1	1	1	1	1	0	1	0	0	1	0	1	1	0	0	0	0	0	0	4
944	0	54	5	1	171	64	21.8871	3	2	1	3347	2	2	1	0	1	0	0	1	0	1	1	1	0	1	0	0	0	0	1	0	1	0	1	4
945	0	39	3	1	177	80	25.5354	4	3	1	3820	3	2	0	1	0	0	0	1	0	1	1	0	1	0	0	1	0	0	0	0	0	0	1	2
946	0	18	1	2	161	54	20.8325	1	1	1	2796	1	2	1	1	1	0	1	1	0	0	0	0	0	1	0	0	1	1	1	0	1	0	1	4
947	0	35	3	2	166	71	25.7657	1	1	1	4211	4	2	0	0	0	1	0	0	0	1	0	0	1	0	1	1	0	1	0	0	0	0	0	4
948	0	75	5	1	178	78	24.6181	2	2	1	3625	3	1	0	1	1	0	0	0	0	1	1	1	0	1	1	0	0	1	1	0	0	1	1	3
949	0	50	4	1	173	66	22.0522	1	1	1	3884	3	2	0	0	1	1	0	0	1	0	1	0	1	1	1	0	0	0	1	0	1	1	1	4
950	0	75	1	1	167	69	24.7409	1	1	1	3965	3	2	1	1	1	1	1	1	1	1	1	0	1	1	0	1	1	0	1	0	1	0	1	2
951	0	50	4	1	166	55	19.9594	1	1	1	3823	3	1	0	0	0	1	0	1	0	1	1	0	1	0	0	0	0	1	0	0	1	1	1	3
952	0	18	1	1	173	74	24.7252	1	1	1	3169	2	2	0	0	0	0	0	1	0	1	0	1	0	1	1	1	0	1	1	0	0	1	0	3
953	0	49	4	2	163	64	24.0882	1	1	1	3089	2	2	1	1	1	0	0	1	1	0	1	1	1	1	1	1	0	0	1	0	0	0	0	4
954	0	50	4	1	174	63	20.8086	1	1	1	3858	3	2	0	1	1	1	1	0	1	0	1	0	0	0	0	0	1	1	1	0	0	1	1	4
955	0	49	4	1	175	69	22.5306	1	1	1	3479	2	2	1	0	0	1	0	0	0	0	1	0	0	1	1	0	0	0	0	0	1	1	0	1
956	0	56	5	2	155	51	21.2279	2	2	1	3089	2	1	1	0	0	0	0	0	0	0	0	1	1	1	0	0	0	0	1	0	0	0	0	1
957	0	45	4	1	176	65	20.984	2	2	1	3261	2	2	0	1	1	1	0	1	1	0	1	1	1	1	1	0	1	1	0	0	1	0	0	3
958	0	75	5	1	178	62	19.5682	2	2	2	3909	3	1	0	0	0	1	1	1	1	0	0	1	1	0	1	0	0	0	1	0	1	1	1	3
959	0	56	5	2	160	46	17.9688	1	1	2	3288	2	2	0	1	1	1	1	0	0	0	1	0	1	1	0	0	0	1	1	0	1	1	1	4
960	0	50	4	2	159	56	22.151	2	2	2	3005	2	2	0	1	1	0	1	0	0	0	0	0	1	1	1	1	1	0	0	0	0	1	0	4
961	0	18	1	2	156	64	26.2985	3	2	2	3187	2	1	0	0	1	0	0	0	1	1	1	1	1	0	0	0	1	0	0	0	1	0	0	1
962	0	56	5	2	155	61	25.3902	2	2	2	3469	2	1	0	0	1	1	1	1	0	0	1	1	0	1	0	0	0	0	0	0	0	0	0	4
963	0	29	2	1	167	57	20.4382	1	1	2	3565	3	2	0	1	0	0	0	0	1	1	1	1	1	1	0	1	1	1	0	0	0	0	1	2
964	0	41	4	2	161	47	18.132	2	2	2	2851	1	2	1	1	0	1	0	1	1	1	0	0	0	0	1	1	0	0	1	0	0	0	1	3
965	0	40	3	1	167	65	23.3067	4	3	2	3508	3	1	0	1	1	0	0	0	0	1	1	0	0	1	0	0	1	0	0	0	1	1	1	1
966	0	39	3	2	173	75	25.0593	2	2	2	3073	2	1	0	0	0	1	1	0	1	0	1	0	0	0	0	0	1	0	0	0	0	0	1	3
967	0	33	3	1	169	55	19.257	2	2	2	4249	4	1	0	1	0	1	0	0	0	1	0	1	1	1	0	0	1	1	0	0	0	1	1	1
968	0	56	5	1	162	61	23.2434	2	2	2	4424	4	2	0	1	0	0	0	1	0	1	1	1	0	0	1	1	1	1	0	0	1	1	1	3
969	0	70	5	1	162	65	24.7676	1	1	2	3459	2	2	0	0	0	0	0	0	0	0	0	1	1	0	1	1	0	1	0	0	1	0	0	3
970	0	37	3	2	167	68	24.3824	2	2	2	3104	2	2	1	0	0	0	1	0	0	0	1	1	0	1	1	1	1	0	0	0	0	0	0	1
971	0	38	3	2	172	62	20.9573	2	2	2	3458	2	1	0	0	0	1	0	0	0	0	0	1	1	0	1	1	1	1	0	0	1	1	0	2
972	0	39	3	2	166	74	26.8544	2	2	1	3757	3	1	0	1	1	1	1	0	1	1	0	0	0	0	1	1	0	1	1	0	0	1	1	4
973	0	43	4	2	176	68	21.9525	2	2	1	3158	2	1	1	0	1	0	0	0	0	0	0	1	0	0	0	0	0	1	0	0	0	0	1	4
974	0	50	4	2	177	58	18.5132	2	2	1	3766	3	2	1	1	0	1	0	0	0	0	1	0	0	0	1	1	1	0	0	0	0	0	1	1
975	0	75	5	1	162	64	24.3865	2	2	1	3922	3	1	0	0	0	0	1	1	1	0	0	0	1	0	0	0	0	1	1	0	0	0	1	4
976	0	39	3	2	173	82	27.3982	2	2	1	3813	3	1	1	0	0	1	1	1	1	1	1	1	0	1	0	0	1	0	0	0	1	1	0	2
977	0	40	3	1	163	65	24.4646	4	3	1	3334	2	2	1	1	1	1	0	1	1	0	1	0	1	0	0	0	0	1	1	0	0	1	1	1
978	0	29	2	1	165	73	26.8136	4	3	1	3577	3	2	1	1	1	1	0	0	0	1	0	0	0	1	1	1	1	0	0	0	0	0	0	3
979	0	75	5	2	178	86	27.143	2	2	1	3546	3	1	1	1	1	1	0	1	0	1	0	1	0	1	1	1	1	1	0	0	0	1	1	2
980	0	72	5	1	165	60	22.0386	2	2	1	3515	3	1	0	0	0	1	0	0	1	1	1	0	1	1	1	0	1	1	0	0	0	0	0	2
981	0	39	3	2	174	70	23.1206	3	2	1	3987	3	2	1	0	1	1	1	1	0	1	0	0	1	1	1	1	0	0	1	0	0	1	0	3
982	0	72	5	1	176	69	22.2753	3	2	1	3762	3	1	1	0	1	0	1	0	1	0	0	0	0	0	0	0	0	0	1	0	0	1	1	1
983	0	18	1	2	157	52	21.0962	3	2	1	3296	2	2	0	0	1	1	1	1	1	1	1	0	0	0	1	0	0	1	0	0	1	1	0	1
984	0	75	1	1	172	66	22.3094	1	1	1	3581	3	2	0	1	1	0	0	0	1	0	0	0	0	0	1	0	1	1	0	0	0	1	1	4
985	0	39	3	1	177	63	20.1092	3	2	1	3696	3	1	0	0	0	0	0	0	1	0	0	1	1	1	1	0	0	0	0	0	1	0	0	2
986	0	50	4	1	173	71	23.7228	3	2	1	3948	3	2	1	0	0	1	1	0	0	0	1	1	0	0	1	0	0	1	1	0	1	1	1	2
987	0	39	3	2	174	77	25.4327	3	2	1	3750	3	1	1	1	1	1	0	1	1	0	1	1	0	1	0	1	0	0	1	0	1	1	1	1
988	0	39	3	1	163	56	21.0772	3	2	1	3947	3	2	0	0	1	0	0	0	0	0	1	0	1	1	0	1	1	0	1	0	1	0	0	1
989	0	39	3	2	166	70	25.4028	3	2	1	3743	3	2	1	1	1	1	0	0	1	0	0	1	1	0	0	0	0	0	0	0	1	0	1	2
990	0	79	5	2	177	72	22.9819	1	1	1	3839	3	1	0	1	0	1	1	0	0	1	1	1	1	1	1	1	0	1	0	0	0	0	1	2
991	0	41	4	2	156	58	23.833	3	2	1	2559	1	2	0	1	1	0	1	0	0	1	1	1	0	0	1	0	0	0	1	0	0	0	0	1
992	0	59	5	2	163	66	24.841	1	1	1	3151	2	1	0	0	1	1	1	0	0	0	0	1	1	1	0	1	0	0	1	0	1	1	0	3
993	0	75	1	1	173	84	28.0664	1	1	1	3759	3	2	0	1	1	0	1	1	0	1	0	0	1	0	1	1	1	0	0	0	0	0	1	1
994	0	39	3	2	160	56	21.875	4	3	1	3501	3	2	1	1	0	0	0	1	1	1	1	1	0	0	1	0	0	0	0	0	1	0	0	2
995	0	18	2	1	163	64	24.0882	4	3	1	3127	2	1	1	1	1	0	1	1	1	1	1	1	0	0	0	1	1	0	0	0	1	1	0	1
996	0	39	3	1	160	57	22.2656	1	1	1	3529	3	2	0	0	1	0	1	0	0	0	0	1	0	0	1	0	1	1	0	0	1	0	0	4
997	0	44	4	1	163	58	21.83	3	2	1	3091	2	2	1	1	1	0	1	1	1	1	0	0	1	0	0	1	1	1	0	0	1	0	0	3
998	0	29	2	1	178	73	23.04	1	1	1	3213	2	1	0	1	1	1	0	0	1	0	0	0	1	0	0	1	1	1	1	0	1	1	1	1
999	0	50	4	1	169	66	23.1084	3	2	1	3883	3	2	0	0	1	0	1	0	1	0	0	0	0	1	0	0	1	1	1	0	1	0	1	2
1000	0	36	3	2	175	70	22.8571	3	2	1	4328	4	2	1	0	0	0	0	1	0	1	0	0	0	1	1	1	1	1	1	0	1	1	1	2
1001	0	18	1	2	161	67	25.8478	3	2	1	3412	2	1	1	0	1	1	1	0	1	1	1	1	0	1	0	0	0	0	1	0	1	1	0	4
1002	0	39	3	1	166	66	23.9512	3	2	1	3555	3	1	0	1	1	0	0	0	0	1	0	0	1	1	0	1	0	1	0	0	0	1	0	2
1003	0	38	3	1	170	61	21.1073	1	1	1	3141	2	2	0	1	1	0	1	0	0	1	0	0	1	1	1	0	1	0	1	0	0	1	0	3
1004	0	39	3	1	162	59	22.4813	3	2	1	3009	2	1	1	0	0	1	0	1	1	1	1	1	0	0	1	0	1	1	1	0	1	0	1	1
1005	0	18	2	1	163	57	21.4536	3	2	1	4445	4	2	1	0	1	0	0	1	1	0	1	1	0	1	0	0	0	1	1	0	0	0	0	4
1006	0	29	2	2	178	79	24.9337	3	2	1	3047	2	2	1	1	1	1	1	1	0	0	1	0	0	1	0	0	0	0	1	0	0	0	1	4
1007	0	62	5	2	169	79	27.6601	2	2	1	4291	4	2	0	1	0	1	1	1	1	1	1	1	0	0	0	0	1	0	0	0	1	0	1	1
1008	0	17	1	1	158	53	21.2306	1	1	1	3124	2	1	1	0	1	0	1	1	1	0	1	1	0	1	1	0	1	1	0	0	0	0	1	2
1009	0	29	2	1	171	60	20.5191	4	3	1	3624	3	2	1	1	0	0	1	0	1	0	0	0	1	0	0	0	1	0	1	0	0	0	0	1
1010	0	30	2	1	177	65	20.7476	3	2	1	3776	3	1	0	0	1	1	1	0	1	1	0	1	1	1	1	0	1	1	1	0	1	1	1	3
1011	0	58	5	1	157	53	21.5019	2	2	1	4343	4	1	1	1	0	0	0	1	0	0	1	1	0	0	0	0	0	1	0	0	1	1	1	2
1012	0	29	2	1	173	69	23.0546	4	3	1	3446	2	1	1	1	0	0	0	0	0	0	0	1	0	1	1	1	1	0	1	0	1	1	0	3
1013	0	15	1	1	173	76	25.3934	1	1	1	3046	2	2	1	1	0	0	1	1	1	0	0	1	0	1	1	0	0	1	0	0	1	0	0	3
1014	0	39	3	2	176	57	18.4013	2	2	1	3351	2	1	1	1	0	0	0	1	1	0	0	0	0	0	0	1	1	1	1	0	0	0	1	4
1015	0	30	2	1	157	49	19.8791	4	3	1	3692	3	2	0	1	1	0	0	0	0	1	0	0	1	0	1	0	0	1	1	0	1	1	0	2
1016	0	49	4	1	159	54	21.3599	2	2	1	3128	2	1	0	1	0	0	1	1	1	0	1	0	1	0	0	0	0	0	0	0	0	0	1	1
1017	0	29	2	1	171	74	25.3069	2	2	1	4186	4	2	1	1	0	0	0	1	1	1	0	1	0	0	1	0	0	0	0	0	0	1	0	2
1018	0	50	4	1	165	67	24.6097	2	2	1	3975	3	2	1	1	0	1	0	0	1	0	0	0	1	1	1	0	1	1	0	0	1	0	1	2
1019	0	39	2	1	173	84	28.0664	4	3	1	3370	2	1	1	0	0	0	0	0	1	0	0	0	1	0	1	0	0	0	1	0	0	1	0	4
1020	0	39	3	2	168	77	27.2817	2	2	1	3196	2	1	1	1	1	0	0	0	0	0	1	1	0	0	1	0	1	1	1	0	1	1	0	4
1021	0	18	1	1	159	47	18.591	1	1	1	3138	2	1	1	1	0	1	1	1	1	0	1	0	0	0	1	0	0	0	1	0	0	0	0	2
1022	0	79	5	2	174	75	24.7721	2	2	1	3629	3	1	1	1	0	0	0	0	0	0	0	1	0	1	0	0	0	0	0	0	0	0	0	2
1023	0	29	2	1	166	60	21.7738	4	3	1	4343	4	1	0	1	0	1	1	1	0	1	1	0	0	1	0	1	1	1	1	0	0	1	0	2
1024	0	29	2	2	157	45	18.2563	4	3	1	3984	3	2	1	1	1	0	0	1	0	1	0	1	0	1	1	1	1	1	0	0	0	0	1	1
1025	0	50	4	1	165	68	24.977	2	2	1	3842	3	2	0	1	1	1	0	0	1	0	1	1	0	0	0	0	0	0	0	0	0	0	0	4
1026	0	75	5	2	174	69	22.7903	2	2	1	3984	3	1	1	0	0	0	0	0	1	0	1	0	1	0	0	1	0	1	0	0	0	1	0	2
1027	0	18	1	2	168	75	26.5731	1	1	1	3689	3	1	1	1	0	1	0	0	0	1	0	1	0	0	1	0	0	0	1	0	0	0	0	2
1028	0	18	1	2	163	63	23.7118	1	1	1	3741	3	2	0	0	0	0	1	0	1	1	1	1	1	1	0	0	0	1	0	0	1	0	1	2
1029	0	17	1	1	176	71	22.921	3	2	1	2880	1	1	0	0	0	0	1	0	0	0	0	1	0	1	0	1	0	0	1	0	1	1	0	1
1030	0	50	4	1	178	74	23.3556	2	2	1	3868	3	2	1	1	0	0	1	1	0	1	0	1	0	0	0	1	0	1	0	0	1	1	0	2
1031	0	58	5	1	173	66	22.0522	2	2	1	4404	4	1	1	0	1	0	0	1	1	1	0	1	0	0	0	0	1	0	0	0	1	0	1	3
1032	0	39	3	1	178	67	21.1463	1	1	1	3268	2	2	0	0	0	1	1	0	0	0	1	1	1	0	1	0	1	0	0	0	0	1	1	3
1033	0	39	3	1	171	74	25.3069	2	2	1	3077	2	1	0	1	1	0	0	0	0	1	0	1	1	1	1	1	0	1	1	0	1	0	0	3
1034	0	39	3	1	160	62	24.2188	2	2	1	2743	1	1	0	0	1	1	0	1	0	0	0	0	1	1	0	1	0	1	0	0	0	1	1	1
1035	0	50	4	2	172	83	28.0557	2	2	1	3942	3	2	0	0	1	1	0	1	0	1	1	0	0	1	1	0	0	0	1	0	0	0	0	4
1036	0	13	1	1	156	45	18.4911	1	1	1	3856	3	2	1	1	0	1	1	1	0	1	1	0	1	0	1	1	1	1	0	0	1	1	0	1
1037	0	27	2	1	159	69	27.2932	4	3	1	3184	2	2	1	1	0	0	1	0	1	1	0	0	0	0	0	1	0	0	1	0	1	0	1	3
1038	0	39	3	1	177	70	22.3435	2	2	1	3049	2	2	0	0	1	1	0	1	0	0	0	0	0	1	1	0	0	1	1	0	0	1	1	4
1039	0	50	4	1	169	73	25.5593	2	2	1	3894	3	2	0	1	1	1	1	0	1	1	0	1	0	0	0	1	1	1	1	0	0	1	1	4
1040	0	20	2	2	166	62	22.4996	4	3	1	2569	1	2	1	0	1	0	1	1	0	1	1	0	1	0	1	0	1	0	1	0	0	1	1	2
1041	0	29	2	2	160	55	21.4844	4	3	1	3096	2	2	0	0	1	0	0	0	1	0	0	1	1	1	0	1	0	0	1	0	1	1	1	4
1042	0	29	2	2	159	51	20.1733	4	3	1	3009	2	2	0	0	0	1	0	1	1	1	0	0	1	0	1	0	1	1	0	0	1	0	1	2
1043	0	39	3	1	174	61	20.148	4	3	1	3635	3	2	0	0	0	1	1	0	1	1	1	0	0	0	1	0	0	0	0	0	1	1	0	2
1044	0	39	3	1	166	60	21.7738	1	1	1	3540	3	2	0	1	1	0	0	0	0	0	1	0	1	1	1	0	1	0	1	0	0	0	1	3
1045	0	18	1	1	171	79	27.0169	1	1	1	3443	2	2	0	1	0	1	0	0	0	0	1	0	0	1	0	1	1	0	1	0	1	1	0	3
1046	0	18	1	2	171	80	27.3588	1	1	1	3800	3	2	0	1	0	1	1	0	1	0	1	0	0	1	0	1	0	1	1	0	1	1	0	2
1047	0	41	4	2	164	61	22.68	1	1	1	2699	1	1	0	0	0	0	0	0	0	0	0	1	0	1	1	0	1	1	1	0	1	0	1	1
1048	0	18	1	2	176	66	21.3068	3	2	1	3261	2	1	1	0	0	1	1	1	1	0	0	0	0	0	1	0	0	0	0	0	0	1	0	2
1049	0	50	4	1	177	84	26.8122	2	2	1	3751	3	2	1	0	1	1	1	1	1	0	0	1	0	1	1	0	1	0	0	0	0	1	0	4
1050	0	39	3	2	166	57	20.6852	2	2	1	3081	2	2	1	0	1	0	1	0	1	1	0	1	0	1	0	1	1	0	0	0	1	0	0	1
1051	0	50	5	2	167	65	23.3067	2	2	1	3074	2	1	0	1	1	1	1	1	0	1	0	0	0	0	1	1	0	0	1	0	1	1	0	4
1052	0	79	3	1	160	49	19.1406	4	3	1	3662	3	2	1	0	0	1	1	0	0	1	1	0	1	0	0	1	0	1	0	0	1	0	0	2
1053	0	50	4	2	165	54	19.8347	2	2	1	3687	3	1	0	1	0	1	0	0	0	0	0	1	0	1	1	0	1	0	0	0	1	0	0	2
1054	0	50	4	2	170	63	21.7993	2	2	1	3911	3	1	0	1	1	0	0	0	1	1	1	0	1	0	0	1	1	1	0	0	1	1	1	2
1055	0	29	2	1	177	63	20.1092	3	2	1	3546	3	1	0	0	0	0	0	0	0	1	0	1	1	1	0	1	0	0	1	0	0	0	0	1
1056	0	18	1	1	158	61	24.4352	1	1	1	3614	3	1	1	1	0	0	1	1	1	0	1	0	0	1	0	0	1	0	0	0	1	0	1	4
1057	0	29	2	2	168	74	26.2188	4	3	1	3616	3	1	1	0	0	1	0	1	1	1	1	0	1	0	1	1	0	0	1	0	0	0	0	2
1058	0	39	3	2	157	61	24.7475	4	3	1	3849	3	2	0	1	1	1	1	0	0	0	0	1	1	1	1	0	0	0	0	0	0	0	1	2
1059	0	29	2	2	160	62	24.2188	4	3	1	3615	3	1	0	1	1	0	0	0	0	0	0	0	0	0	0	0	1	0	0	0	1	0	1	3
1060	0	17	2	1	174	72	23.7812	4	3	1	4053	4	2	0	0	0	0	1	1	0	0	1	1	1	1	1	0	0	1	0	0	1	0	1	2
1061	0	39	3	2	169	69	24.1588	4	3	1	3906	3	2	0	1	0	1	1	0	0	1	1	1	1	0	0	0	1	0	1	0	0	0	0	3
1062	0	18	1	1	165	78	28.6501	1	1	1	3073	2	2	0	1	0	0	1	0	0	0	1	1	1	0	0	1	1	1	1	0	1	1	0	4
1063	0	50	4	1	155	67	27.8876	2	2	1	3568	3	2	0	0	0	0	0	1	0	1	0	0	0	0	1	1	1	0	1	0	0	1	0	4
1064	0	39	3	2	172	68	22.9854	2	2	1	3605	3	1	0	1	1	0	1	0	0	1	0	1	0	1	0	0	1	1	1	0	0	0	1	3
1065	0	29	2	2	165	71	26.079	4	3	1	3927	3	2	1	0	1	0	1	1	0	0	1	1	0	0	0	1	0	0	1	0	0	0	0	4
1066	0	20	2	1	180	79	24.3827	4	3	1	3007	2	2	1	0	0	0	1	0	0	0	1	0	0	1	0	0	0	1	1	0	0	0	0	1
1067	0	18	1	1	166	65	23.5883	1	1	1	3117	2	2	1	1	0	0	1	1	0	0	0	0	0	0	1	0	0	0	0	0	1	1	0	2
1068	0	39	3	1	165	60	22.0386	4	3	1	3620	3	1	1	1	0	1	0	1	0	1	0	0	0	0	0	1	0	0	0	0	0	0	0	3
1069	0	29	2	1	176	77	24.858	4	3	1	3507	3	2	1	1	1	1	1	0	1	0	1	1	1	1	0	1	0	0	0	0	0	1	0	4
1070	0	49	4	1	176	88	28.4091	2	2	1	3269	2	2	1	1	0	0	0	1	1	0	0	1	1	0	0	1	1	0	1	0	1	1	1	3
1071	0	46	4	2	175	61	19.9184	2	2	1	3484	2	1	1	0	0	0	1	1	0	0	1	1	1	0	0	1	0	1	1	0	0	1	1	3
1072	0	53	5	1	178	88	27.7743	2	2	1	2986	1	1	0	1	0	1	1	0	1	0	0	1	0	0	1	0	1	1	1	0	1	0	0	4
1073	0	49	4	2	157	61	24.7475	2	2	1	3333	2	1	0	1	0	0	0	1	0	0	0	0	1	0	1	0	1	1	1	0	1	0	0	4
1074	0	75	5	2	161	64	24.6904	2	2	1	3625	3	1	1	1	1	1	0	1	1	1	1	1	0	0	0	0	0	0	0	0	1	1	0	4
1075	0	50	4	1	160	63	24.6094	1	1	1	2868	1	1	0	1	0	0	0	0	1	1	0	0	0	1	0	0	0	0	0	0	1	1	1	1
1076	0	50	4	1	157	52	21.0962	3	2	1	3414	2	2	1	1	1	1	1	0	1	0	1	0	0	0	0	1	1	0	1	0	0	1	1	1
1077	0	30	2	1	177	77	24.5779	3	2	1	3737	3	1	1	0	0	1	1	1	0	1	0	0	0	1	0	1	0	1	1	0	1	0	1	4
1078	0	50	4	2	172	64	21.6333	3	2	1	3676	3	2	0	1	1	1	0	0	1	1	0	1	0	0	1	1	0	1	0	0	1	1	0	3
1079	0	50	4	1	166	61	22.1367	3	2	1	3982	3	2	0	0	1	0	1	0	0	0	1	1	0	1	0	0	1	0	1	0	0	1	0	4
1080	0	29	2	2	173	82	27.3982	3	2	1	3864	3	1	0	1	0	1	1	0	0	0	0	0	1	1	1	0	1	1	0	0	1	0	1	4
1081	0	49	4	2	163	59	22.2063	3	2	1	3040	2	2	0	0	1	0	0	0	1	0	1	0	0	0	1	1	1	0	1	0	1	1	0	3
1082	0	50	4	2	167	59	21.1553	3	2	1	3814	3	1	0	1	1	1	1	0	1	1	0	0	1	0	0	0	1	1	0	0	1	1	1	1
1083	0	39	3	2	157	58	23.5304	3	2	1	3830	3	2	1	0	1	0	0	0	1	0	0	0	1	1	1	1	0	0	1	0	0	1	0	4
1084	0	49	4	1	171	65	22.2291	3	2	1	3208	2	1	1	1	1	1	1	0	1	0	0	0	1	1	1	0	1	1	0	0	1	0	0	1
1085	0	39	3	2	169	72	25.2092	3	2	1	3668	3	2	1	0	0	0	0	1	0	1	1	1	1	1	1	0	0	0	0	0	1	0	1	3
1086	0	19	2	1	169	62	21.7079	3	2	1	4267	4	2	1	1	0	1	0	1	0	0	0	1	1	1	1	1	1	1	1	0	0	1	0	3
1087	0	78	5	2	171	64	21.8871	3	2	1	3390	2	2	1	0	1	1	0	1	1	0	1	0	1	1	0	1	1	1	0	0	1	1	1	1
1088	0	50	4	2	161	66	25.462	3	2	1	3957	3	1	1	1	0	1	1	1	1	0	1	1	0	1	1	1	1	1	1	0	1	0	0	4
1089	0	28	2	1	177	76	24.2587	3	2	1	3835	3	2	1	0	1	0	1	0	1	1	0	1	0	0	0	1	0	1	0	0	1	0	1	1
1090	0	36	3	1	156	61	25.0657	3	2	1	3396	2	2	0	1	1	1	0	1	1	0	0	0	0	1	0	1	1	1	1	0	0	0	0	3
1091	0	17	1	1	158	50	20.0288	3	2	1	2739	1	1	1	0	1	1	1	1	1	1	0	0	0	1	1	1	1	1	0	0	1	0	1	2
1092	0	39	3	1	157	53	21.5019	3	2	1	3521	3	2	1	1	0	1	0	0	0	0	0	1	1	1	1	0	1	1	0	0	1	1	0	3
1093	0	72	5	1	177	82	26.1738	3	2	1	3747	3	1	0	1	0	0	0	1	1	1	1	1	1	0	0	0	1	1	1	0	1	0	0	3
1094	0	18	1	2	161	69	26.6193	3	2	1	3874	3	1	1	0	0	0	0	1	1	1	0	1	1	0	0	0	0	1	1	0	0	1	1	4
1095	0	39	3	2	163	58	21.83	3	2	1	3599	3	2	1	0	0	1	1	0	1	0	1	1	1	1	0	1	1	0	0	0	1	1	0	2
1096	0	29	2	2	163	63	23.7118	3	2	1	3466	2	2	0	1	1	0	0	1	1	1	0	0	0	0	0	0	0	1	1	0	0	1	1	3
1097	0	29	2	1	157	68	27.5873	4	3	1	3153	2	1	0	1	1	1	1	1	0	0	1	1	1	0	1	0	0	1	0	0	0	0	1	2
1098	0	41	4	1	177	79	25.2163	2	2	1	3385	2	1	0	0	0	0	0	1	1	0	1	1	0	0	0	1	1	1	0	0	1	1	0	3
1099	0	29	2	2	178	78	24.6181	4	3	1	3967	3	2	1	1	1	0	1	0	1	1	0	0	1	1	1	0	0	0	0	0	0	1	1	3
1100	0	32	3	1	167	71	25.4581	4	3	1	3249	2	2	0	0	0	1	0	0	1	0	0	1	1	0	1	0	1	1	1	0	0	0	1	4
1101	0	39	3	1	162	65	24.7676	1	1	1	3542	3	2	0	1	1	1	0	0	0	1	1	1	1	0	1	0	1	1	1	0	0	0	0	4
1102	0	50	4	2	172	64	21.6333	3	2	1	3890	3	1	0	1	0	0	0	0	1	1	0	0	0	0	0	1	1	0	0	0	1	0	1	4
1103	0	61	5	2	169	74	25.9095	1	1	1	4247	4	2	0	0	0	1	0	0	1	1	1	0	1	0	0	1	0	0	1	0	0	0	1	4
1104	0	39	3	1	175	84	27.4286	2	2	1	3629	3	1	0	0	0	0	0	1	0	0	0	1	1	1	0	0	0	0	1	0	1	1	0	1
1105	0	29	2	1	165	64	23.5078	4	3	1	3267	2	1	1	1	0	0	1	1	1	0	0	0	0	1	0	0	0	1	1	0	1	0	1	1
1106	0	20	2	1	167	53	19.0039	3	2	1	4346	4	2	0	1	0	1	0	1	0	1	1	1	0	0	0	1	0	1	0	0	0	0	1	4
1107	0	18	2	2	163	68	25.5937	4	3	1	3267	2	1	0	1	1	0	0	0	0	0	0	1	1	0	1	0	0	0	0	0	1	1	0	1
1108	0	29	2	2	166	63	22.8625	4	3	1	3646	3	2	1	1	0	0	0	1	0	1	0	0	0	0	0	0	0	1	1	0	0	1	1	2
1109	0	18	1	1	162	49	18.6709	1	1	1	3022	2	2	0	1	0	0	0	0	0	1	0	1	0	0	0	0	0	0	0	0	0	0	1	1
1110	0	29	2	1	177	69	22.0243	4	3	1	3600	3	1	0	1	1	1	1	1	1	0	1	1	0	0	0	0	0	1	0	0	0	0	1	2
1111	0	13	1	1	135	37	20.3018	1	1	1	3391	2	2	0	0	1	1	1	1	1	1	1	0	1	1	1	0	0	0	1	0	0	0	1	2
1112	0	76	1	1	172	62	20.9573	1	1	1	3924	3	2	0	0	0	0	0	0	0	1	1	0	0	0	1	1	1	0	1	0	0	1	1	4
1113	0	18	1	1	157	55	22.3133	1	1	1	3494	2	1	1	1	0	0	0	0	1	0	1	1	1	0	1	0	0	1	1	0	1	0	1	1
1114	0	38	3	2	178	66	20.8307	2	2	1	3352	2	2	1	0	1	0	0	1	1	1	1	0	1	1	1	0	0	1	0	0	0	1	1	3
1115	0	50	4	1	176	68	21.9525	1	1	1	3905	3	2	0	1	0	1	1	0	1	1	0	1	1	0	0	0	1	0	1	0	0	1	0	4
1116	0	64	5	1	162	50	19.052	1	1	1	2936	1	1	0	1	0	1	0	0	0	0	0	0	1	0	0	0	1	0	1	0	1	0	1	2
1117	0	18	1	1	164	54	20.0773	1	1	1	3085	2	2	1	0	1	0	1	1	0	0	1	0	1	0	0	0	0	1	0	0	1	1	1	1
1118	0	26	2	1	161	56	21.6041	3	2	1	3728	3	1	0	1	0	0	1	0	0	0	1	1	1	0	0	1	1	1	0	0	1	1	1	4
1119	0	50	4	1	177	75	23.9395	1	1	1	3634	3	2	0	1	0	0	1	0	0	0	0	0	0	0	0	1	0	1	1	0	1	1	1	2
1120	0	27	2	1	178	73	23.04	4	3	1	3124	2	1	0	1	0	1	1	1	1	0	1	1	0	0	1	0	0	1	1	0	1	1	1	4
1121	0	43	4	1	161	59	22.7615	2	2	1	3122	2	1	0	1	1	0	1	1	1	1	0	1	0	0	1	0	1	1	0	0	0	1	0	2
1122	0	79	3	1	177	76	24.2587	4	3	1	3601	3	2	0	0	0	1	0	1	0	1	0	1	0	0	1	1	0	1	1	0	0	1	0	4
1123	0	18	1	1	162	50	19.052	1	1	1	3021	2	1	0	0	1	0	1	0	1	1	0	1	1	1	1	0	1	0	0	0	1	1	1	4
1124	0	49	4	1	178	77	24.3025	2	2	1	3438	2	2	0	0	1	0	1	0	1	1	0	1	1	0	0	1	1	0	0	0	1	0	0	1
1125	0	30	3	1	170	52	17.9931	1	1	1	2766	1	1	0	1	1	0	1	0	0	1	0	0	1	0	1	1	0	1	1	0	0	0	1	4
1126	0	50	4	1	162	66	25.1486	2	2	1	3695	3	1	1	1	1	0	1	0	1	0	1	0	1	0	1	1	0	0	1	0	1	0	0	4
1127	0	18	1	1	162	63	24.0055	1	1	1	3027	2	1	1	1	1	0	1	0	1	0	1	1	1	0	0	1	0	0	1	0	1	0	0	2
1128	0	18	2	1	172	66	22.3094	1	1	1	3423	2	2	0	1	0	1	0	0	1	0	1	1	0	1	0	1	0	1	0	0	1	1	0	2
1129	0	75	1	1	156	60	24.6548	1	1	1	3809	3	2	0	1	0	1	0	0	0	0	1	0	0	0	0	1	0	0	0	0	0	1	1	1
1130	0	41	4	1	177	69	22.0243	1	1	1	2710	1	1	0	1	0	1	0	0	0	1	0	1	1	0	1	1	1	0	0	0	1	1	0	1
1131	0	63	5	1	158	52	20.83	1	1	1	3023	2	1	0	0	1	0	1	0	1	1	1	0	0	0	1	1	1	1	0	0	0	0	1	2
1132	0	29	2	1	165	76	27.9155	4	3	1	2513	1	1	1	0	1	0	1	1	1	1	1	0	1	1	0	1	0	1	1	0	1	0	0	4
1133	0	39	3	1	160	47	18.3594	1	1	1	3169	2	1	0	0	0	0	0	0	1	1	0	1	0	0	1	0	0	0	1	0	1	0	0	2
1134	0	23	2	1	168	57	20.1956	1	1	1	2532	1	1	1	0	0	0	1	1	1	1	1	1	1	0	0	1	1	0	1	0	1	0	1	3
1135	0	29	2	2	173	63	21.0498	4	3	1	4330	4	2	1	0	0	0	1	1	0	0	0	1	0	1	1	1	1	1	0	0	1	0	0	3
1136	0	59	5	1	172	73	24.6755	2	2	1	4091	4	2	1	0	0	0	1	1	0	0	1	1	1	0	0	0	0	1	0	0	1	0	1	2
1137	0	29	2	2	175	83	27.102	1	1	1	3669	3	1	0	1	1	0	0	0	1	1	1	1	0	1	0	1	1	1	1	0	0	0	0	1
1138	0	39	3	1	163	52	19.5717	1	1	1	3195	2	2	0	0	1	1	1	0	1	1	0	0	0	0	1	0	1	1	0	0	0	0	0	4
1139	0	28	2	1	163	58	21.83	1	1	1	3443	2	2	0	1	1	1	0	0	1	1	0	1	1	0	1	0	1	0	0	0	0	1	0	1
1140	0	49	4	2	170	61	21.1073	1	1	1	3004	2	2	0	0	0	0	0	0	0	1	0	1	0	0	0	0	1	0	0	0	0	1	1	4
1141	0	38	3	1	165	58	21.3039	3	2	1	3201	2	2	1	0	0	1	1	1	0	1	1	0	1	0	0	1	1	0	1	0	0	0	1	3
1142	0	56	5	1	173	82	27.3982	3	2	1	3012	2	2	0	0	1	1	1	1	0	1	0	1	0	1	1	0	0	1	0	0	1	1	1	4
1143	0	29	2	1	156	60	24.6548	1	1	1	4144	4	2	0	0	1	1	1	0	0	1	0	1	0	1	1	0	1	1	0	0	1	1	0	1
1144	0	18	2	2	162	67	25.5296	3	2	1	3219	2	2	1	0	0	1	1	1	1	0	0	0	0	0	1	1	0	0	0	0	1	0	1	3
1145	0	50	4	2	155	66	27.4714	3	2	1	3966	3	1	1	1	1	0	0	0	0	1	0	0	0	0	0	0	0	0	0	0	0	0	1	1
1146	0	39	3	1	176	64	20.6612	3	2	1	3895	3	2	0	1	0	0	0	0	0	1	1	0	0	0	1	0	0	1	1	0	1	1	0	3
1147	0	29	2	2	171	80	27.3588	3	2	1	4154	4	2	0	0	0	0	0	1	0	1	1	0	0	0	1	0	0	1	1	0	1	1	0	4
1148	0	29	2	1	168	52	18.424	3	2	1	3788	3	1	0	1	1	0	1	1	0	0	1	0	1	0	1	1	0	0	1	0	1	0	1	4
1149	0	45	4	1	161	67	25.8478	2	2	1	3100	2	1	0	1	1	1	1	1	1	0	1	1	0	0	0	1	1	1	0	0	0	1	0	3
1150	0	29	2	2	171	61	20.8611	4	3	1	3907	3	2	0	0	0	1	0	0	0	1	1	0	0	0	0	1	0	0	0	0	1	1	0	1
1151	0	39	3	1	176	60	19.3698	4	3	1	3826	3	2	0	0	0	1	0	1	0	0	1	0	1	1	1	0	0	0	0	0	0	0	1	2
1152	0	79	4	2	165	71	26.079	2	2	1	3743	3	2	1	0	1	0	0	0	0	1	1	1	1	0	1	1	0	1	0	0	1	1	1	3
1153	0	29	2	1	170	54	18.6851	4	3	1	3925	3	2	1	1	1	0	1	1	1	0	1	1	0	1	1	1	1	1	0	0	1	0	1	1
1154	0	39	3	2	170	80	27.6817	2	2	1	3668	3	1	1	1	0	0	0	1	0	1	0	0	1	0	0	1	0	1	1	0	1	1	0	4
1155	0	50	4	1	156	65	26.7094	1	1	1	3742	3	1	1	0	1	0	1	0	0	0	1	1	1	1	0	1	0	0	1	0	0	1	1	4
1156	0	39	3	1	170	70	24.2215	1	1	1	3036	2	2	0	0	0	1	1	0	1	0	0	1	0	1	0	1	1	1	0	0	0	0	1	1
1157	0	39	3	1	176	57	18.4013	1	1	1	3308	2	2	1	0	0	0	1	0	1	1	0	0	0	0	1	0	0	0	1	0	0	0	1	4
1158	0	58	5	1	174	75	24.7721	1	1	1	3005	2	1	1	0	1	0	0	1	1	0	0	0	0	1	0	0	0	1	1	0	1	1	0	1
1159	0	50	4	1	155	66	27.4714	1	1	1	3784	3	2	0	1	1	1	0	0	1	0	1	1	0	0	0	0	0	0	1	0	0	0	1	4
1160	0	49	4	1	164	61	22.68	1	1	1	3273	2	2	0	1	1	0	0	0	1	1	0	1	1	0	0	0	1	0	1	0	0	0	1	1
1161	0	29	2	1	165	63	23.1405	1	1	1	3895	3	1	0	1	0	0	0	1	1	1	1	1	1	0	1	1	1	1	1	0	0	1	1	2
1162	0	50	4	2	164	56	20.8209	1	1	1	3329	2	2	1	0	1	0	1	0	1	0	1	1	1	1	1	1	0	1	0	0	0	1	0	1
1163	0	39	3	1	177	67	21.3859	1	1	1	3781	3	1	0	1	1	1	0	1	1	0	1	0	0	1	0	0	1	0	0	0	1	0	0	1
1164	0	75	1	2	171	71	24.281	1	1	1	3503	3	2	0	1	1	1	1	0	1	1	1	0	0	1	0	1	1	1	1	0	0	0	0	4
1165	0	29	2	1	159	56	22.151	3	2	1	3951	3	1	1	1	0	1	0	1	0	1	1	1	0	0	1	0	1	0	1	0	1	0	0	4
1166	0	18	1	1	167	64	22.9481	1	1	1	3122	2	1	0	0	0	1	1	0	0	0	1	0	1	1	0	1	0	1	0	0	1	0	0	2
1167	0	29	2	2	159	65	25.711	4	3	1	3173	2	2	0	0	1	1	1	1	0	0	1	1	1	0	0	0	0	0	0	0	1	1	1	4
1168	0	53	5	1	166	60	21.7738	2	2	1	4258	4	1	1	1	0	0	0	0	1	0	1	1	0	0	1	1	0	0	0	0	1	1	1	2
1169	0	46	4	2	164	68	25.2826	2	2	1	3459	2	1	0	0	0	1	1	0	1	1	0	1	1	1	1	1	1	0	0	0	1	1	1	3
1170	0	18	1	2	172	73	24.6755	1	1	1	3711	3	1	0	0	1	1	0	0	1	0	1	1	1	1	0	1	0	0	0	0	1	1	1	2
1171	0	79	5	2	163	50	18.8189	2	2	1	3877	3	1	1	1	1	0	1	1	0	1	1	1	0	0	0	1	0	1	0	0	1	1	1	2
1172	0	18	1	2	155	57	23.7253	1	1	1	3335	2	2	0	0	0	0	0	0	0	0	0	1	0	1	1	0	1	0	0	0	1	1	0	3
1173	0	18	1	2	157	67	27.1816	3	2	1	3280	2	1	1	1	0	1	1	0	0	1	1	0	0	0	1	1	0	0	0	0	1	1	0	2
1174	0	29	2	2	158	59	23.634	4	3	1	3484	2	2	0	0	1	1	1	0	0	1	1	0	0	0	0	1	1	0	1	0	1	0	1	4
1175	0	18	1	2	163	68	25.5937	1	1	1	3827	3	2	0	0	0	1	0	1	0	0	1	1	1	0	0	1	1	1	0	0	0	1	0	1
1176	0	29	2	1	163	66	24.841	1	1	1	3160	2	1	0	1	1	1	1	0	0	1	0	0	1	1	0	1	0	1	0	0	0	1	1	3
1177	0	50	4	2	160	64	25	2	2	1	3682	3	1	1	1	1	1	1	0	0	1	0	0	0	1	1	1	1	1	0	0	1	0	1	1
1178	0	13	1	1	163	52	19.5717	1	1	1	3341	2	2	1	0	0	1	0	1	0	1	1	0	1	0	1	0	0	0	1	0	1	1	1	4
1179	0	39	3	2	163	54	20.3244	1	1	1	3385	2	1	0	0	1	0	1	0	1	0	0	0	1	0	1	1	1	1	1	0	1	1	0	2
1180	0	38	3	1	171	77	26.3329	2	2	1	3380	2	1	1	1	1	1	0	1	1	0	1	0	1	1	1	0	1	1	1	0	1	0	1	3
1181	0	32	3	2	167	61	21.8724	4	3	1	4102	4	2	0	0	1	0	0	1	0	0	0	0	1	0	0	0	0	0	1	0	1	1	0	2
1182	0	47	4	1	162	74	28.1969	2	2	1	4237	4	1	1	0	0	1	0	0	1	1	0	0	0	0	0	1	1	0	1	0	1	1	1	2
1183	0	39	3	2	165	70	25.7117	1	1	1	3319	2	2	0	0	1	0	1	0	1	1	1	0	1	1	1	1	1	0	1	0	1	0	0	1
1184	0	30	2	1	169	69	24.1588	4	3	1	3578	3	1	0	1	0	0	0	0	1	1	1	0	1	0	0	1	1	1	0	0	0	0	0	2
1185	0	30	2	1	169	64	22.4082	1	1	1	3668	3	1	0	1	1	0	0	0	0	1	0	1	1	0	1	1	0	1	1	0	1	0	1	3
1186	0	66	5	1	160	56	21.875	3	2	1	3322	2	2	0	1	0	1	0	1	0	1	0	0	0	1	0	1	0	0	1	0	0	0	1	4
1187	0	25	2	1	158	56	22.4323	1	1	1	2912	1	1	0	0	1	1	1	0	1	1	0	0	0	1	1	1	1	1	0	1	1	0	1	3
1188	0	31	3	1	177	69	22.0243	3	2	1	2525	1	1	1	1	0	0	0	0	1	0	1	0	1	1	0	1	1	1	1	1	1	0	0	3
1189	0	58	5	1	174	85	28.075	1	1	1	2816	1	1	0	1	0	0	0	0	1	0	1	0	0	0	1	1	0	1	0	1	0	0	0	2
1190	0	69	5	1	165	63	23.1405	3	2	1	4012	4	2	0	1	1	0	1	0	0	1	1	1	0	1	1	1	1	1	1	0	1	1	1	1
1191	0	40	4	1	175	78	25.4694	3	2	1	2763	1	1	0	0	1	1	1	0	1	1	0	0	0	0	1	0	1	1	1	1	0	1	0	1
1192	0	29	2	2	173	68	22.7204	4	3	1	3628	3	2	0	1	0	0	1	0	0	1	0	0	0	1	1	0	0	0	0	0	1	0	#NULL!	3
1193	0	36	3	2	161	53	20.4467	2	2	1	4396	4	1	1	1	1	0	1	1	0	0	0	1	1	0	0	1	0	0	1	0	0	0	#NULL!	4
1194	0	52	5	2	157	45	18.2563	2	2	1	3356	2	2	0	0	0	0	0	0	1	1	1	1	0	0	0	1	1	0	0	1	0	0	#NULL!	2
1195	0	39	3	2	177	86	27.4506	2	2	1	3765	3	1	1	0	1	0	1	1	0	1	1	1	1	1	0	1	1	0	0	1	1	1	#NULL!	1
1196	0	49	4	1	164	73	27.1416	2	2	1	3224	2	2	0	1	0	0	0	0	1	1	0	0	1	1	0	1	0	0	1	1	1	1	#NULL!	3
1197	0	36	3	1	167	64	22.9481	2	2	1	3407	2	2	1	0	1	0	0	1	0	1	1	1	1	1	0	1	0	1	1	0	1	0	#NULL!	4
1198	0	18	1	2	155	58	24.1415	1	1	1	3091	2	2	0	0	0	1	1	0	0	0	1	0	0	1	1	1	1	0	0	0	1	1	#NULL!	4
1199	0	18	1	1	163	63	23.7118	1	1	1	3694	3	1	0	1	0	0	1	0	1	1	1	1	1	0	1	1	0	1	1	1	0	0	#NULL!	2
1200	0	30	2	2	178	72	22.7244	4	3	1	3986	3	1	0	0	0	1	0	0	1	1	0	0	0	1	0	0	0	0	0	1	1	1	#NULL!	4
1201	0	39	3	1	168	65	23.03	4	3	1	3377	2	2	1	0	1	1	1	1	0	0	0	0	0	1	0	1	0	0	0	1	1	0	#NULL!	3
1202	0	29	2	1	174	55	18.1662	3	2	1	3952	3	1	1	1	1	0	1	1	0	0	0	0	1	1	1	1	0	1	1	0	1	0	#NULL!	1
1203	0	50	4	2	158	54	21.6311	2	2	1	3960	3	2	0	0	0	1	1	0	1	0	0	1	0	1	1	0	1	0	1	1	1	1	#NULL!	1
1204	0	14	1	1	161	52	20.061	3	2	1	2840	1	1	1	0	1	1	1	1	1	1	0	0	1	1	1	1	1	1	0	0	1	1	#NULL!	3
1205	0	18	1	1	172	77	26.0276	1	1	1	3409	2	1	0	1	0	0	0	0	1	1	0	0	0	0	0	1	0	0	1	1	0	1	#NULL!	3
1206	0	50	4	2	166	66	23.9512	2	2	1	3747	3	2	1	0	1	0	0	1	1	1	0	0	1	1	0	1	1	1	0	0	1	0	#NULL!	4
1207	0	28	2	1	161	60	23.1473	3	2	1	3948	3	1	1	0	1	0	1	1	0	0	1	1	0	1	1	0	0	0	1	1	1	0	#NULL!	4
1208	0	29	2	2	172	66	22.3094	4	3	1	3427	2	1	0	1	0	0	1	0	1	1	1	0	1	1	1	0	0	1	0	1	1	1	#NULL!	1
1209	0	75	5	2	168	51	18.0697	2	2	1	3981	3	1	1	1	1	0	0	1	0	0	1	0	0	0	0	1	1	0	1	0	0	0	#NULL!	1
1210	0	39	3	1	174	56	18.4965	4	3	1	3509	3	1	1	1	1	0	0	1	1	1	1	1	1	0	0	0	1	1	1	1	0	1	#NULL!	3
1211	0	50	4	2	156	67	27.5312	2	2	1	3689	3	2	1	1	1	0	0	1	1	1	0	0	1	0	0	0	0	1	1	1	0	1	#NULL!	1
1212	0	18	1	2	158	51	20.4294	1	1	1	3006	2	2	0	0	0	0	1	0	1	1	1	0	1	0	1	0	0	0	1	1	0	0	#NULL!	2
1213	0	49	3	1	173	79	26.3958	1	1	1	3361	2	2	0	0	1	0	1	0	0	1	0	1	0	1	1	1	1	0	1	0	1	1	#NULL!	1
1214	0	50	4	1	155	48	19.9792	2	2	1	3727	3	2	1	0	1	0	0	1	1	1	1	1	0	1	1	1	0	1	0	0	1	1	#NULL!	1
1215	0	49	4	1	156	56	23.0112	1	1	1	3117	2	2	0	1	0	0	1	0	0	1	0	0	0	0	1	0	1	1	1	1	0	1	#NULL!	3
1216	0	16	1	1	161	66	25.462	1	1	1	3036	2	1	0	1	0	0	1	0	1	1	1	0	0	0	0	1	0	0	0	0	0	1	#NULL!	4
1217	0	39	2	1	159	65	25.711	4	3	1	3441	2	1	0	0	0	1	0	0	0	1	1	1	0	0	1	1	0	1	1	1	0	0	#NULL!	4
1218	0	16	1	2	174	86	28.4053	1	1	1	3481	2	2	0	0	0	1	1	0	1	0	1	1	0	1	1	0	0	0	1	0	1	0	#NULL!	2
1219	0	50	4	1	168	68	24.093	2	2	1	3113	2	1	0	0	0	1	1	0	0	0	1	0	1	0	0	0	1	1	1	1	0	0	#NULL!	1
1220	0	40	3	2	156	49	20.1348	2	2	1	3704	3	2	0	0	0	1	1	0	0	0	0	0	1	1	1	1	0	1	1	0	1	0	#NULL!	4
1221	0	29	2	1	161	48	18.5178	3	2	1	4287	4	2	1	0	1	1	0	1	0	1	1	0	1	0	1	0	0	0	0	0	0	1	#NULL!	2
1222	0	29	2	1	173	71	23.7228	3	2	1	3633	3	1	1	1	1	0	1	1	1	0	1	0	1	0	1	1	1	0	1	1	0	1	#NULL!	3
1223	0	18	1	1	156	48	19.7239	1	1	1	3672	3	2	1	1	1	1	1	1	0	0	1	0	1	1	1	0	0	0	0	0	1	1	#NULL!	2
1224	0	39	3	2	174	68	22.46	2	2	1	3662	3	2	0	0	0	0	1	0	0	1	0	0	1	0	1	0	0	1	0	0	0	0	#NULL!	4
1225	0	16	1	1	163	54	20.3244	1	1	1	3445	2	2	1	0	1	0	0	1	0	1	0	0	1	0	1	0	1	1	0	0	0	0	#NULL!	1
1226	0	39	3	2	169	65	22.7583	1	1	1	3740	3	2	0	1	0	0	0	0	1	1	0	0	1	0	1	0	1	1	0	0	0	0	#NULL!	3
1227	0	39	3	1	159	70	27.6888	1	1	1	3427	2	2	0	0	0	1	1	0	1	0	1	1	0	0	1	0	0	1	0	0	0	1	#NULL!	2
1228	0	32	3	1	161	61	23.533	4	3	1	3286	2	2	0	0	0	0	0	0	1	0	0	1	0	0	0	0	1	0	0	0	0	0	#NULL!	1
1229	0	39	3	2	174	66	21.7994	1	1	1	3531	3	2	0	0	0	0	0	0	1	1	1	0	1	0	1	1	0	1	0	0	0	0	#NULL!	4
1230	0	29	2	2	168	64	22.6757	4	3	1	3634	3	2	0	0	0	1	0	0	1	0	1	0	1	0	1	1	0	1	0	0	0	1	#NULL!	1
1231	0	30	2	1	156	64	26.2985	1	1	1	3815	3	1	0	0	1	1	0	0	0	1	1	0	1	0	1	1	1	0	0	1	0	0	#NULL!	3
1232	0	19	2	1	173	56	18.7109	1	1	1	4104	4	2	0	1	0	1	0	0	1	0	0	0	1	1	1	1	1	1	0	0	1	1	1	3
1233	0	50	4	1	175	65	21.2245	2	2	1	3981	3	1	1	0	0	0	0	0	1	1	0	0	0	0	1	0	1	1	0	0	0	0	0	4
1234	0	39	3	2	174	75	24.7721	3	2	1	3842	3	2	0	0	0	0	0	0	1	0	1	1	0	0	0	0	0	1	1	0	0	1	0	2
1235	0	39	3	2	156	69	28.3531	1	1	1	3720	3	1	0	1	1	1	1	0	0	1	1	0	1	1	0	1	0	1	1	0	0	1	1	4
1236	0	51	5	1	175	78	25.4694	3	2	1	4070	4	2	0	0	0	1	1	1	1	0	0	1	0	0	1	0	1	1	0	0	1	1	1	4
1237	0	50	4	1	159	57	22.5466	3	2	1	3925	3	2	0	0	0	1	0	0	1	1	1	1	0	1	1	1	0	1	1	0	1	0	0	1
1238	0	10	1	2	140	48	24.4898	1	1	1	2742	1	2	1	0	1	0	1	1	1	0	0	1	0	0	0	1	0	1	1	0	1	1	1	2
1239	0	65	5	1	170	59	20.4152	1	1	1	3365	2	2	0	0	0	0	1	0	0	1	1	0	1	0	0	0	1	0	1	0	1	0	1	1
1240	0	35	3	1	175	78	25.4694	3	2	1	4335	4	2	1	0	1	1	1	0	0	1	1	0	1	0	1	1	1	1	0	0	1	1	0	4
1241	0	68	5	1	155	59	24.5578	1	1	1	3209	2	1	0	0	0	1	0	0	1	1	1	1	0	0	1	1	1	0	0	0	1	1	1	3
1242	0	29	2	1	173	57	19.0451	3	2	1	3667	3	2	1	1	1	0	1	1	0	1	0	0	0	0	0	1	1	0	0	0	1	1	1	3
1243	0	29	2	2	172	61	20.6193	1	1	1	3496	2	2	0	0	1	0	0	0	0	1	1	1	1	1	1	1	1	0	0	0	1	1	1	2
1244	0	54	5	1	173	57	19.0451	1	1	1	4122	4	2	0	0	1	0	1	0	1	0	0	0	1	0	0	0	1	1	1	0	0	1	1	2
1245	0	29	2	1	165	68	24.977	3	2	1	3629	3	2	1	0	0	0	1	1	0	1	0	1	1	0	1	1	0	0	1	0	1	0	1	4
1246	0	29	2	1	163	69	25.9701	4	3	1	3616	3	2	1	0	1	0	1	0	1	0	1	0	0	1	0	0	1	1	0	0	1	0	0	4
1247	0	29	2	1	172	55	18.5911	1	1	1	3840	3	2	0	0	1	1	0	0	1	0	1	1	1	0	0	1	0	0	1	0	1	1	0	1
1248	0	49	4	1	177	71	22.6627	3	2	1	3326	2	1	0	1	0	1	1	0	1	0	0	1	1	0	0	1	0	1	1	0	0	1	1	4
1249	0	18	1	1	156	61	25.0657	3	2	1	3083	2	1	0	1	0	1	0	0	1	1	1	1	1	0	1	1	0	1	1	0	1	1	1	1
1250	0	50	4	1	168	69	24.4473	3	2	1	3805	3	2	1	0	0	1	0	0	0	1	0	1	0	1	1	1	1	0	0	0	0	0	0	2
1251	0	50	4	2	173	84	28.0664	3	2	1	3695	3	1	1	0	0	1	1	1	1	0	1	0	1	0	1	0	0	0	0	0	1	1	1	4
1252	0	18	1	2	171	78	26.6749	1	1	1	3395	2	2	0	1	1	1	1	1	1	1	1	0	0	1	1	1	0	1	1	0	0	1	1	3
1253	0	62	5	2	164	64	23.7954	1	1	1	4373	4	2	0	1	0	1	1	0	1	0	0	1	1	1	0	0	1	1	1	0	1	0	#NULL!	1
1254	0	46	4	1	159	66	26.1066	2	2	1	3049	2	2	1	0	1	1	0	1	0	1	1	0	0	0	1	0	0	0	1	0	0	1	#NULL!	2
1255	0	65	5	1	166	69	25.0399	1	1	1	3008	2	2	0	1	1	0	1	0	0	0	1	1	1	0	1	0	0	1	0	1	0	0	#NULL!	3
1256	0	50	4	2	162	55	20.9572	2	2	1	3957	3	2	0	1	1	1	1	1	1	0	0	1	1	0	1	1	1	0	1	0	1	0	0	3
1257	0	18	1	1	161	55	21.2183	1	1	1	3860	3	2	0	0	1	0	1	1	1	1	0	1	0	0	1	1	1	0	1	0	1	1	0	4
1258	0	29	2	1	174	75	24.7721	4	3	1	3564	3	1	1	0	0	0	0	1	0	0	0	0	1	0	0	1	0	1	1	0	1	0	0	1
1259	0	56	5	1	159	71	28.0843	2	2	1	3241	2	2	0	0	0	0	0	1	0	1	0	1	1	1	0	0	1	0	0	0	0	0	0	3
1260	0	29	2	1	170	65	22.4913	4	3	1	4425	4	1	0	1	0	1	0	1	0	0	1	0	0	0	0	0	1	1	0	0	1	1	1	1
1261	0	75	1	1	171	57	19.4932	1	1	1	3950	3	2	0	0	1	1	1	0	1	0	1	0	1	0	1	1	0	0	1	0	0	0	1	3
1262	0	50	4	1	159	61	24.1288	2	2	1	4442	4	1	0	1	1	0	0	1	0	0	0	1	0	1	0	1	1	1	1	0	1	0	1	2
1263	0	50	4	1	155	54	22.4766	3	2	1	3529	3	1	1	1	1	0	1	0	0	1	0	0	1	0	1	0	0	1	1	0	1	1	1	1
1264	0	29	2	2	169	60	21.0077	4	3	1	3627	3	2	0	1	1	1	0	0	0	1	0	1	1	1	0	1	1	0	1	0	0	1	1	2
1265	0	29	2	1	171	72	24.623	4	3	1	3399	2	2	0	1	0	1	1	1	1	1	0	0	0	1	0	1	0	0	1	0	0	0	0	4
1266	0	39	3	1	173	65	21.7181	2	2	1	3001	2	2	1	1	1	1	1	0	0	1	0	0	0	0	0	0	0	0	0	0	1	0	1	2
1267	0	39	3	1	162	74	28.1969	4	3	1	3875	3	2	1	0	1	1	0	0	1	1	1	0	0	0	0	1	1	1	0	0	0	1	1	1
1268	0	41	4	1	162	70	26.6728	2	2	1	2789	1	1	1	1	1	0	1	1	0	0	1	1	1	1	1	0	1	1	0	0	1	1	0	4
1269	0	39	3	2	176	77	24.858	4	3	1	3759	3	2	1	0	1	0	0	0	1	1	0	1	0	1	0	0	0	0	0	0	1	0	1	2
1270	0	29	2	1	160	68	26.5625	1	1	1	3666	3	2	0	0	0	0	1	0	0	0	1	0	1	1	1	1	0	0	1	0	1	1	1	1
1271	0	39	3	1	176	60	19.3698	1	1	1	3523	3	2	0	1	0	1	0	0	0	1	0	0	1	0	0	1	1	1	1	0	1	0	0	2
1272	0	75	1	1	176	77	24.858	1	1	1	3738	3	2	1	0	0	0	1	0	1	0	0	0	1	1	0	1	1	0	1	0	1	1	1	1
1273	0	50	4	1	160	59	23.0469	2	2	1	3578	3	2	0	1	0	1	1	1	0	1	0	0	0	1	0	0	0	0	1	0	0	0	0	3
1274	0	40	3	2	177	81	25.8546	2	2	1	3595	3	1	0	0	0	0	0	0	1	1	1	1	0	0	0	1	1	1	0	0	0	1	1	1
1275	0	41	4	1	178	62	19.5682	2	2	1	2994	1	1	0	0	1	0	0	1	0	0	0	1	0	1	0	0	0	0	0	0	0	1	0	4
1276	0	40	3	1	171	77	26.3329	4	3	1	3933	3	2	0	1	1	0	1	0	1	0	0	0	0	0	0	1	0	0	0	0	1	0	1	2
1277	0	18	1	1	160	50	19.5312	1	1	1	4074	4	1	0	0	1	0	0	0	1	1	0	0	1	1	1	0	1	0	1	0	0	1	1	3
1278	0	32	3	1	161	57	21.9899	4	3	1	4280	4	2	0	0	1	0	1	1	1	0	0	0	0	0	0	0	0	1	1	0	0	0	0	4
1279	0	29	2	1	177	79	25.2163	4	3	1	3823	3	2	0	0	0	1	0	0	0	0	1	1	1	1	0	1	0	0	1	0	1	1	1	4
1280	0	40	4	1	174	78	25.763	2	2	1	4204	4	1	0	1	0	0	1	0	0	0	1	0	1	0	0	1	1	1	1	0	0	0	1	2
1281	0	18	1	1	160	56	21.875	1	1	1	3215	2	2	1	1	1	1	0	0	0	1	1	1	0	0	0	1	0	0	0	0	1	1	1	1
1282	0	18	1	1	159	67	26.5021	1	1	1	3690	3	2	0	1	1	0	1	0	1	1	1	1	0	1	1	0	0	1	0	0	1	0	1	3
1283	0	38	3	1	173	85	28.4005	2	2	1	3118	2	2	0	0	1	0	0	0	1	1	1	1	0	0	0	0	1	1	1	0	1	1	1	2
1284	0	29	2	2	175	68	22.2041	1	1	1	4135	4	2	0	1	0	1	1	0	0	1	0	1	1	1	0	1	0	0	0	0	0	0	0	1
1285	0	15	1	2	168	74	26.2188	1	1	1	4427	4	1	0	1	0	0	0	1	0	1	0	1	0	0	0	1	1	1	0	0	0	1	1	1
1286	0	49	4	1	166	73	26.4915	2	2	1	3092	2	2	0	1	1	0	1	1	1	0	0	1	0	0	0	0	1	1	0	0	1	0	0	4
1287	0	29	2	1	167	73	26.1752	4	3	1	3045	2	2	0	1	1	1	1	1	1	1	1	1	1	0	1	0	0	0	0	0	0	1	1	4
1288	0	50	4	1	171	60	20.5191	2	2	1	3833	3	1	0	1	0	0	0	0	1	0	0	1	1	0	1	0	0	0	1	0	1	0	0	1
1289	0	39	3	2	169	66	23.1084	2	2	1	3532	3	2	1	0	1	1	1	1	1	1	1	1	0	1	1	0	0	0	1	0	0	0	0	4
1290	0	32	3	1	178	68	21.4619	3	2	1	3319	2	1	1	1	1	1	0	1	1	0	1	0	1	0	0	0	0	0	1	0	1	1	1	2
1291	0	40	4	1	160	57	22.2656	3	2	1	3294	2	2	1	0	0	0	1	0	0	1	1	0	0	0	1	1	1	0	1	0	0	0	0	2
1292	0	51	5	2	172	74	25.0135	3	2	1	4405	4	2	0	1	1	1	0	0	0	0	0	0	1	1	0	0	1	1	0	0	1	1	1	2
1293	0	30	2	1	174	74	24.4418	3	2	1	3156	2	2	1	1	1	0	0	0	1	0	1	1	0	0	1	1	1	1	1	0	0	1	1	1
1294	0	39	3	2	167	72	25.8166	3	2	1	3857	3	2	1	0	1	0	0	1	0	0	0	1	0	1	0	0	1	0	0	0	1	0	0	1
1295	0	50	4	1	172	64	21.6333	3	2	1	3779	3	2	1	0	1	1	0	1	0	1	1	0	1	1	0	1	0	0	0	0	1	0	0	3
1296	0	38	3	2	162	61	23.2434	3	2	1	3928	3	2	0	1	0	1	0	0	1	0	0	1	0	0	1	0	0	0	0	0	0	0	0	4
1297	0	39	3	1	178	82	25.8806	3	2	1	3660	3	2	1	1	1	0	1	1	1	1	1	1	1	0	0	0	0	1	1	0	1	0	0	1
1298	0	30	3	1	173	65	21.7181	3	2	1	3003	2	1	0	0	0	0	1	1	0	0	1	1	1	0	0	0	0	1	1	0	0	0	0	1
1299	0	29	2	1	176	77	24.858	1	1	1	3172	2	1	0	1	0	1	0	0	0	1	1	0	0	1	0	0	0	0	0	0	1	1	1	2
1300	0	29	2	2	160	49	19.1406	3	2	1	3938	3	1	0	0	0	0	0	0	0	1	0	1	0	0	0	1	0	0	0	0	0	0	1	3
1301	0	18	1	1	175	73	23.8367	1	1	1	3032	2	1	0	1	1	0	1	0	1	0	1	0	0	0	1	1	0	0	0	0	0	1	0	2
1302	0	40	3	1	156	49	20.1348	3	2	1	3556	3	2	1	1	0	0	0	1	1	0	1	0	0	0	0	1	0	1	1	0	0	0	1	3
1303	0	18	1	1	156	68	27.9421	3	2	1	4415	4	1	1	1	0	0	1	1	0	0	0	1	1	1	1	1	1	1	0	0	1	1	0	1
1304	0	18	1	2	159	55	21.7555	3	2	1	2512	1	2	0	1	1	0	0	0	1	1	1	0	1	0	1	0	1	1	1	0	0	1	1	3
1305	0	13	1	2	134	48	26.732	3	2	1	2974	1	1	0	0	1	0	0	1	0	1	0	0	0	0	1	0	0	1	1	0	0	1	1	1
1306	0	26	2	1	160	66	25.7812	3	2	1	2968	1	1	1	1	0	0	1	1	0	0	1	0	1	0	1	1	1	1	1	0	1	1	1	2
1307	0	18	1	1	159	63	24.9199	3	2	1	2763	1	2	1	0	1	0	0	1	1	1	1	0	0	1	0	1	1	1	1	0	0	1	0	1
1308	0	20	2	2	159	53	20.9644	3	2	1	2616	1	1	0	0	0	0	0	0	0	0	1	1	1	0	1	0	1	0	0	0	1	0	1	3
1309	0	39	3	2	161	66	25.462	3	2	1	3699	3	2	1	0	1	1	1	1	1	1	1	0	1	1	0	0	1	0	1	0	0	1	0	2
1310	0	39	3	1	156	58	23.833	3	2	1	3510	3	2	0	1	1	0	1	1	1	0	0	1	1	1	1	0	1	0	1	0	0	0	1	3
1311	0	14	1	1	153	66	28.1943	3	2	1	4323	4	1	1	0	0	0	1	1	1	0	1	1	0	0	1	0	0	1	0	0	1	1	0	1
1312	0	29	2	1	165	65	23.8751	3	2	1	3380	2	2	0	0	1	0	0	0	0	1	1	0	0	0	1	1	0	1	0	0	0	1	1	3
1313	0	40	3	1	158	51	20.4294	3	2	1	2691	1	2	1	0	0	0	0	1	1	0	0	1	0	0	0	1	0	1	1	0	1	0	0	3
1314	0	63	5	2	159	61	24.1288	3	2	1	3019	2	2	1	1	1	0	1	1	1	0	0	1	1	1	1	1	0	0	1	0	0	0	0	1
1315	0	18	1	1	157	61	24.7475	3	2	1	3417	2	2	1	0	1	1	1	1	1	1	1	0	1	0	0	0	0	0	1	0	1	1	0	4
1316	0	18	1	1	168	69	24.4473	3	2	1	3713	3	2	1	1	0	1	0	0	1	0	1	0	1	1	0	1	0	1	0	0	1	0	1	4
1317	0	29	2	1	156	65	26.7094	1	1	1	3822	3	1	0	1	0	1	0	0	0	0	1	1	1	0	0	1	0	0	0	0	1	1	1	3
1318	0	32	3	2	169	67	23.4586	3	2	1	4334	4	2	0	0	0	1	1	0	1	1	0	1	0	1	0	1	0	0	1	0	0	1	0	2
1319	0	29	2	2	165	72	26.4463	3	2	1	3742	3	1	0	1	1	0	1	0	0	0	1	1	0	1	1	1	1	0	0	0	0	1	0	3
1320	0	50	4	1	166	56	20.3223	3	2	1	3675	3	2	1	1	0	1	0	0	0	1	0	0	1	0	0	1	0	1	1	0	1	0	1	1
1321	0	29	2	1	160	68	26.5625	3	2	1	3263	2	2	1	0	0	1	0	1	0	0	0	1	1	1	1	1	1	1	1	0	1	0	0	1
1322	0	33	3	2	163	62	23.3355	3	2	1	4454	4	1	1	1	0	1	0	1	0	1	0	0	0	0	0	1	1	1	1	0	0	1	1	1
1323	0	39	3	1	163	70	26.3465	3	2	1	4419	4	1	1	0	1	1	1	1	1	1	0	0	1	0	0	1	1	1	0	0	0	0	0	4
1324	0	14	1	2	158	66	26.4381	3	2	1	3696	3	1	0	0	1	0	1	1	1	1	0	1	1	1	0	1	0	1	0	0	0	1	1	1
1325	0	18	1	2	169	52	18.2066	3	2	1	3132	2	1	0	0	1	0	1	1	0	1	0	1	0	1	0	1	1	1	0	0	0	1	0	1
1326	0	39	3	2	164	66	24.539	3	2	1	3736	3	2	1	1	1	1	1	0	1	0	1	1	1	1	0	0	1	1	1	0	0	0	1	3
1327	0	55	5	1	174	85	28.075	3	2	1	3438	2	1	1	0	0	1	1	1	0	1	0	0	1	0	1	0	1	0	1	0	1	0	1	4
1328	0	29	2	2	164	61	22.68	3	2	1	3168	2	2	0	0	0	0	0	1	1	0	0	0	0	0	0	1	1	1	0	0	0	0	0	2
1329	0	29	2	2	168	53	18.7783	3	2	1	3819	3	1	0	0	0	1	0	1	1	1	0	0	1	1	1	0	0	1	1	0	0	1	1	2
1330	0	35	3	1	166	68	24.677	3	2	1	4208	4	2	1	0	0	1	0	0	1	1	1	0	1	1	1	0	0	0	1	0	1	0	1	2
1331	0	51	5	2	170	77	26.6436	3	2	1	4404	4	2	1	0	1	1	1	0	0	1	1	1	0	0	1	1	1	1	0	0	1	0	0	2
1332	0	58	5	1	159	47	18.591	3	2	1	4413	4	1	1	0	1	0	1	0	0	1	1	1	0	1	0	0	1	0	1	0	0	1	1	1
1333	0	29	2	1	176	72	23.2438	3	2	1	3949	3	2	1	0	1	1	0	0	1	0	0	0	0	0	0	1	1	0	0	0	0	1	0	2
1334	0	40	3	1	177	77	24.5779	3	2	1	3955	3	2	0	0	0	1	0	1	1	0	1	1	0	1	0	0	1	0	0	0	0	0	0	2
1335	0	18	1	1	156	51	20.9566	3	2	1	3067	2	2	1	0	1	0	0	1	1	0	1	1	0	0	1	1	1	0	0	0	1	1	1	2
1336	0	49	4	1	162	51	19.433	3	2	1	3496	2	1	1	0	1	0	1	0	0	1	1	0	0	1	1	0	1	0	0	0	1	0	1	2
1337	0	50	4	1	157	67	27.1816	3	2	1	3883	3	1	1	1	1	0	1	0	0	0	1	1	0	1	1	1	0	0	1	0	1	0	0	4
1338	0	39	3	1	156	55	22.6003	3	2	1	3410	2	1	1	0	1	1	0	1	0	1	0	0	0	1	1	0	0	0	0	0	0	1	0	1
1339	0	44	4	1	156	69	28.3531	3	2	1	2692	1	1	1	1	0	0	0	1	1	1	1	0	0	1	1	0	1	1	0	0	0	1	1	1
1340	0	18	1	1	173	61	20.3816	3	2	1	3497	2	1	0	0	0	0	1	1	1	0	1	0	1	1	1	0	0	1	1	0	0	1	1	3
1341	0	18	1	2	170	66	22.8374	3	2	1	3085	2	2	0	0	0	0	0	0	0	1	0	1	0	1	1	0	1	0	1	0	0	0	1	4
1342	0	25	2	1	172	76	25.6896	3	2	1	2991	1	2	1	1	0	0	0	0	0	1	1	0	1	0	0	1	1	1	0	0	1	1	1	3
1343	0	18	1	1	176	66	21.3068	1	1	1	3076	2	2	0	0	0	1	0	0	1	0	1	0	1	1	1	1	0	0	0	0	1	1	0	2
1344	0	49	4	2	160	64	25	2	2	1	2826	1	2	1	0	1	1	1	0	1	0	1	1	0	1	0	1	1	1	0	0	0	0	0	4
1345	0	18	2	1	157	61	24.7475	1	1	1	2907	1	1	0	1	0	0	0	1	0	0	0	0	0	1	0	1	1	1	1	0	1	0	1	2
1346	0	18	1	1	156	64	26.2985	1	1	1	3952	3	2	0	1	1	1	0	0	1	1	0	0	0	0	1	0	0	1	0	0	1	1	0	1
1347	0	18	1	1	159	66	26.1066	1	1	1	3476	2	2	0	1	1	1	0	1	1	0	1	0	0	1	0	0	1	1	1	0	1	0	0	4
1348	0	18	1	1	176	66	21.3068	1	1	1	3575	3	1	0	1	0	1	0	0	0	1	1	1	1	0	1	1	0	0	1	0	0	1	0	2
1349	0	40	3	1	165	66	24.2424	1	1	1	3673	3	2	0	0	1	0	1	0	1	0	0	0	1	1	1	1	1	0	0	0	0	0	1	4
1350	0	39	3	1	164	57	21.1927	4	3	1	3072	2	2	0	0	1	1	0	1	0	1	0	0	1	0	0	0	1	0	1	0	1	1	1	1
1351	0	49	4	2	178	61	19.2526	2	2	1	3464	2	1	0	1	1	1	0	0	1	1	0	0	0	0	0	1	1	1	0	0	0	0	1	4
1352	0	76	1	2	169	63	22.0581	1	1	1	3913	3	1	1	1	1	1	0	0	1	1	1	1	0	1	1	1	1	0	1	0	1	1	0	4
1353	0	58	5	1	175	55	17.9592	2	2	1	2529	1	1	1	1	0	1	0	1	0	1	1	1	1	1	0	1	1	0	1	0	0	0	0	2
1354	0	40	3	1	157	50	20.2848	4	3	1	3853	3	2	0	0	0	1	0	0	0	0	1	1	1	0	0	1	0	0	0	0	1	0	0	4
1355	0	39	3	1	165	61	22.4059	2	2	1	3749	3	1	0	1	0	0	1	1	1	1	1	0	1	1	0	1	1	1	1	0	0	0	1	4
1356	0	15	1	1	159	48	18.9866	1	1	1	3052	2	1	1	1	0	0	1	0	0	0	0	0	1	1	0	1	0	0	0	0	1	1	0	1
1357	0	39	3	1	176	73	23.5666	4	3	1	3800	3	2	1	1	0	0	1	0	0	1	0	0	1	1	0	1	1	1	1	0	0	1	0	2
1358	0	28	2	1	170	63	21.7993	4	3	1	3906	3	2	0	0	1	1	0	0	1	0	0	1	0	0	1	0	1	0	0	0	1	0	0	3
1359	0	79	4	1	170	66	22.8374	2	2	1	3551	3	2	1	1	0	1	1	1	1	0	1	1	1	0	0	0	1	1	0	0	0	0	0	1
1360	0	28	2	1	168	77	27.2817	1	1	1	3953	3	2	0	0	0	1	1	0	0	1	0	0	0	1	1	1	1	1	0	0	1	0	1	3
1361	0	31	4	1	167	54	19.3625	2	2	1	2566	1	2	1	0	0	0	1	1	0	0	1	1	0	0	1	0	0	1	0	0	1	1	0	4
1362	0	58	5	2	164	60	22.3081	2	2	1	3359	2	2	1	1	1	0	1	1	0	1	0	1	1	0	0	1	1	1	0	0	1	1	1	3
1363	0	69	5	1	158	53	21.2306	2	2	1	3233	2	1	1	1	0	1	0	1	1	0	0	0	1	1	0	1	1	1	0	0	1	0	1	2
1364	0	49	4	1	167	62	22.231	2	2	1	3079	2	1	0	0	1	0	0	0	1	0	0	0	0	0	0	1	0	0	0	0	0	1	1	4
1365	0	18	1	1	176	81	26.1493	1	1	1	3075	2	2	0	0	1	0	1	0	0	0	1	1	0	0	0	1	0	1	1	0	1	1	1	3
1366	0	36	3	2	176	73	23.5666	3	2	1	3193	2	2	1	1	0	1	0	1	1	1	1	0	0	1	0	1	1	0	0	0	1	1	1	3
1367	0	36	3	2	158	61	24.4352	3	2	1	3403	2	2	0	0	0	0	0	1	1	0	0	0	1	1	1	1	0	0	1	0	1	0	1	3
1368	0	51	5	2	168	72	25.5102	2	2	1	2586	1	1	1	0	0	1	0	0	0	0	1	0	1	0	1	0	0	0	0	0	0	1	1	3
1369	0	50	4	1	169	68	23.8087	2	2	1	3720	3	1	0	1	0	1	0	1	1	1	1	1	1	1	0	1	0	1	0	0	0	1	1	1
1370	0	17	2	1	166	50	18.1449	4	3	1	2958	1	2	1	0	0	1	0	1	1	1	1	0	0	1	0	0	1	1	1	0	1	1	0	1
1371	0	76	1	2	174	64	21.1389	1	1	1	3528	3	2	1	0	1	1	1	1	0	0	1	1	0	1	0	1	0	1	1	0	0	1	0	1
1372	0	18	1	1	163	73	27.4756	3	2	1	2692	1	1	1	1	0	0	1	0	0	1	1	0	1	1	0	0	0	1	1	0	1	0	0	2
1373	0	58	5	2	159	47	18.591	2	2	1	2506	1	1	0	1	1	1	0	0	0	1	1	1	0	0	1	1	1	1	0	0	1	0	1	4
1374	0	29	2	1	167	60	21.5139	4	3	1	3417	2	2	1	0	0	1	0	1	1	1	0	1	1	0	0	0	0	1	0	0	1	1	1	3
1375	0	46	4	1	178	84	26.5118	2	2	1	2963	1	1	0	0	1	0	1	1	1	0	1	0	1	0	1	0	0	1	1	0	1	1	1	4
1376	0	18	1	2	172	65	21.9713	1	1	1	3380	2	1	0	0	1	1	0	0	1	1	1	1	0	1	1	1	0	0	1	0	1	0	1	3
1377	0	76	1	1	171	72	24.623	1	1	1	3754	3	2	0	1	0	0	0	0	1	1	0	1	1	1	0	1	1	1	0	0	1	0	0	1
1378	0	50	4	1	158	56	22.4323	1	1	1	3940	3	2	0	0	0	1	0	0	0	1	0	1	0	0	1	0	1	0	0	0	1	0	1	1
1379	0	49	4	2	174	71	23.4509	3	2	1	3465	2	1	0	0	1	0	0	1	1	1	1	1	1	1	0	0	1	0	1	0	0	0	1	4
1380	0	38	3	1	166	52	18.8707	1	1	1	3460	2	2	0	1	0	0	0	0	1	1	0	0	1	0	1	1	0	0	0	0	1	0	0	1
1381	0	40	3	1	167	55	19.721	3	2	1	3550	3	2	1	1	0	1	1	0	0	1	1	0	1	0	0	0	0	0	0	0	0	0	0	1
1382	0	18	1	1	159	60	23.7332	3	2	1	4190	4	1	1	1	0	1	0	0	1	1	1	0	0	0	0	0	1	1	0	0	0	1	1	1
1383	0	24	2	1	154	49	20.6612	3	2	1	3426	2	1	1	1	0	0	0	1	0	0	0	1	1	1	1	0	0	1	0	0	1	1	1	1
1384	0	29	2	1	170	72	24.9135	3	2	1	3165	2	2	0	0	0	1	1	0	1	0	1	0	1	0	1	0	0	0	0	0	0	1	1	2
1385	0	38	3	2	157	48	19.4734	3	2	1	3390	2	1	0	1	0	0	1	1	1	1	0	0	1	1	1	0	1	1	0	0	0	0	1	1
1386	0	49	4	1	161	50	19.2894	3	2	1	3242	2	2	1	0	0	0	1	0	0	0	0	1	1	1	0	1	1	1	0	0	0	1	0	1
1387	0	32	3	2	157	70	28.3987	1	1	1	2999	1	2	0	0	0	1	0	0	0	1	1	0	0	0	1	0	0	0	0	0	1	1	1	3
1388	0	24	2	1	173	64	21.3839	3	2	1	3170	2	1	1	0	0	1	1	1	1	1	0	0	0	1	0	1	1	0	0	0	1	1	0	4
1389	0	29	2	1	167	70	25.0995	3	2	1	3624	3	1	1	1	0	0	1	0	0	0	1	0	1	0	0	0	0	1	0	0	0	1	1	1
1390	0	79	5	2	156	59	24.2439	3	2	1	3817	3	1	1	0	0	0	1	1	0	0	1	1	0	1	1	1	1	1	1	0	0	0	0	3
1391	0	13	1	2	145	46	21.8787	1	1	1	2985	1	1	0	1	1	0	0	0	1	1	1	0	0	0	0	1	0	1	0	0	0	0	1	4
1392	0	39	3	2	163	49	18.4425	1	1	1	3487	2	2	0	1	0	1	1	0	0	1	1	1	0	0	1	1	1	1	1	0	0	0	0	4
1393	0	53	5	1	166	74	26.8544	1	1	1	4275	4	2	0	1	1	1	1	0	0	0	0	0	1	1	0	1	0	0	0	0	0	0	0	3
1394	0	39	3	1	176	88	28.4091	1	1	1	3984	3	2	0	0	1	1	1	0	0	0	0	0	0	0	0	0	1	1	0	0	0	1	0	1
1395	0	18	1	2	173	60	20.0474	1	1	1	3678	3	1	0	1	1	0	1	0	1	0	0	1	0	1	1	0	0	0	1	0	0	0	1	4
1396	0	36	3	2	163	54	20.3244	3	2	1	3275	2	2	1	0	0	1	0	0	0	1	0	1	1	0	1	0	1	0	0	0	0	1	0	1
1397	0	50	4	1	157	54	21.9076	3	2	1	3809	3	1	0	1	1	1	1	0	1	0	1	1	1	0	0	1	0	0	1	0	1	0	0	4
1398	0	40	4	1	161	58	22.3757	3	2	1	4135	4	1	1	1	1	0	1	1	1	0	0	1	0	1	1	1	1	0	1	0	1	0	0	4
1399	0	29	2	2	162	62	23.6244	3	2	1	3532	3	1	0	0	1	0	0	1	1	0	0	1	0	0	0	1	1	1	0	0	0	0	0	2
1400	0	49	4	1	171	55	18.8092	3	2	1	3362	2	1	0	1	0	0	0	1	1	0	1	1	1	0	1	0	1	0	1	0	1	0	0	3
1401	0	39	3	2	161	63	24.3046	3	2	1	3770	3	1	1	0	1	1	0	0	0	0	0	1	1	1	0	1	0	1	0	0	1	0	1	1
1402	0	62	5	2	169	68	23.8087	3	2	1	3045	2	1	1	1	0	1	1	1	1	1	0	1	1	1	1	0	0	0	0	0	0	1	1	1
1403	0	18	1	2	165	60	22.0386	3	2	1	3030	2	1	1	1	0	0	1	0	0	1	0	1	1	1	0	1	0	1	0	0	1	1	1	2
1404	0	50	4	1	156	64	26.2985	1	1	1	3791	3	2	0	0	1	0	1	0	0	0	0	1	0	0	0	1	1	0	1	0	0	0	0	4
1405	0	40	3	1	160	58	22.6562	3	2	1	3803	3	2	0	0	1	1	0	0	1	0	1	0	1	1	0	0	1	1	1	0	1	1	1	1
1406	0	18	1	2	159	53	20.9644	3	2	1	3026	2	1	1	1	1	1	1	0	0	1	0	1	0	0	1	0	0	1	0	0	0	1	1	4
1407	0	29	2	1	165	67	24.6097	3	2	1	3942	3	2	1	0	1	1	1	0	1	1	0	1	0	0	0	0	1	0	0	0	0	1	1	3
1408	0	37	3	1	163	52	19.5717	3	2	1	4239	4	2	1	1	1	0	0	1	1	1	0	0	1	1	0	0	1	0	0	0	0	0	1	2
1409	0	20	2	2	155	66	27.4714	3	2	1	2658	1	2	1	0	0	1	1	1	0	0	0	1	1	0	0	1	1	1	0	0	1	1	0	2
1410	0	68	5	1	161	61	23.533	3	2	1	4070	4	1	1	0	0	1	1	1	0	0	1	0	1	1	1	0	1	0	1	0	1	0	1	2
1411	0	28	2	1	178	61	19.2526	3	2	1	3594	3	2	0	0	0	0	0	0	0	0	1	1	0	0	1	0	0	1	0	0	1	1	0	1
1412	0	39	3	1	161	60	23.1473	3	2	1	3754	3	2	0	1	1	1	1	0	1	1	1	0	0	1	1	1	0	1	1	0	0	0	0	4
1413	0	76	1	2	178	65	20.5151	3	2	1	3685	3	2	1	0	0	0	0	0	0	1	0	1	1	1	1	1	1	1	0	0	0	0	1	1
1414	0	29	2	1	160	56	21.875	3	2	1	3970	3	1	1	1	0	0	1	0	0	1	0	0	1	1	0	0	1	1	1	0	1	0	0	3
1415	0	56	5	2	175	79	25.7959	1	1	1	4474	4	2	0	1	0	0	0	0	0	1	1	1	1	0	0	1	1	1	1	0	1	0	1	1
1416	0	29	2	1	178	76	23.9869	3	2	1	3005	2	2	1	1	1	1	1	0	1	0	1	0	1	0	1	1	1	0	1	0	1	0	0	4
1417	0	39	3	2	175	81	26.449	3	2	1	3809	3	2	0	0	1	0	1	1	0	1	0	1	0	1	1	0	0	1	0	0	1	1	0	2
1418	0	39	3	1	170	58	20.0692	3	2	1	3842	3	2	0	0	1	0	1	1	0	0	0	0	0	1	1	1	0	1	0	0	1	1	0	2
1419	0	70	5	1	171	75	25.6489	3	2	1	4090	4	2	0	1	0	0	0	1	0	1	1	1	1	0	0	0	1	0	0	0	0	0	1	4
1420	0	39	3	1	157	53	21.5019	1	1	1	3913	3	2	0	1	1	0	1	0	1	1	1	0	1	0	0	0	0	0	1	0	1	1	0	2
1421	0	79	3	1	176	88	28.4091	4	3	1	3788	3	2	0	1	1	1	0	0	0	1	0	1	1	1	1	0	1	1	1	0	0	0	0	3
1422	0	39	3	1	159	61	24.1288	4	3	1	3822	3	1	1	0	1	1	0	1	1	1	1	1	1	0	0	0	1	1	0	0	0	0	1	2
1423	0	56	5	2	170	81	28.0277	2	2	1	3355	2	2	0	0	0	1	0	0	0	0	1	1	0	0	1	0	0	1	0	0	0	1	1	4
1424	0	18	1	2	158	56	22.4323	1	1	1	3565	3	1	0	1	1	0	0	0	1	0	0	1	0	1	0	0	1	0	1	0	1	1	1	2
1425	0	32	3	1	175	74	24.1633	4	3	1	4384	4	2	1	1	1	0	0	1	0	1	0	1	1	1	1	0	0	1	0	0	0	1	1	2
1426	0	75	5	2	167	77	27.6095	1	1	1	3916	3	1	0	0	1	1	0	0	0	0	1	0	0	0	0	1	1	1	1	0	0	1	0	2
1427	0	39	3	1	163	72	27.0993	4	3	1	3829	3	2	0	0	0	0	0	1	1	1	0	1	0	0	0	1	0	1	1	0	1	1	0	4
1428	0	18	1	2	168	61	21.6128	1	1	1	3444	2	1	1	0	0	0	1	0	0	1	0	1	0	0	1	0	1	1	0	0	0	0	1	3
1429	0	49	4	1	171	69	23.597	2	2	1	3356	2	2	0	1	0	1	0	1	1	1	1	0	0	1	0	0	1	0	0	0	1	1	1	3
1430	0	29	2	1	160	57	22.2656	3	2	1	4057	4	2	0	0	1	1	0	0	1	1	0	0	1	1	1	0	1	0	1	0	0	0	0	1
1431	0	18	1	1	155	53	22.0604	1	1	1	4158	4	1	0	1	0	0	1	1	1	1	1	1	1	1	0	1	1	1	1	0	0	1	0	4
1432	0	45	4	1	174	84	27.7447	2	2	1	4370	4	1	1	1	0	1	0	0	1	0	1	0	0	0	1	0	0	0	0	0	1	0	0	3
1433	0	79	3	1	175	63	20.5714	4	3	1	3811	3	2	1	0	1	1	0	1	0	1	0	0	0	0	1	0	1	1	1	0	1	1	1	2
1434	0	43	4	1	168	55	19.487	2	2	1	4135	4	1	1	0	1	0	1	1	1	0	0	0	1	0	1	0	1	0	1	0	0	1	0	1
1435	0	39	3	2	160	63	24.6094	1	1	1	3412	2	2	0	0	0	1	1	0	0	1	0	1	1	0	0	0	0	0	1	0	0	0	0	3
1436	0	49	4	1	160	64	25	2	2	1	3096	2	1	0	1	0	1	0	1	1	1	0	0	1	1	0	1	0	1	0	0	0	0	0	4
1437	0	66	5	1	165	72	26.4463	2	2	1	4322	4	2	0	0	0	0	0	0	0	0	0	1	1	0	0	1	1	0	0	0	0	1	1	2
1438	0	18	1	1	162	62	23.6244	1	1	2	4144	4	1	0	1	1	0	0	1	1	1	0	0	0	1	1	0	0	1	1	0	1	1	1	1
1439	0	29	2	1	156	54	22.1893	1	1	2	3895	3	2	0	0	1	1	1	0	0	0	0	0	1	0	1	1	1	1	1	0	1	1	1	1
1440	0	50	5	2	177	75	23.9395	2	2	2	3198	2	2	1	0	1	1	1	1	1	1	1	0	0	0	1	0	0	0	0	0	1	1	0	4
1441	0	37	3	2	172	63	21.2953	2	2	2	3019	2	1	1	1	1	1	1	1	1	0	0	0	1	1	1	1	0	0	1	0	1	1	1	2
1442	0	29	2	1	158	61	24.4352	4	3	2	3689	3	2	1	0	0	0	1	1	0	1	0	0	0	1	1	0	1	1	1	0	0	1	1	3
1443	0	41	4	2	163	72	27.0993	2	2	2	3266	2	2	0	1	1	0	1	1	0	1	1	0	0	0	1	0	0	0	0	0	1	1	0	1
1444	0	18	1	1	169	66	23.1084	1	1	2	3208	2	2	0	0	1	1	1	0	1	1	1	1	0	0	1	1	1	0	1	0	1	0	1	4
1445	0	39	3	1	156	56	23.0112	4	3	2	3848	3	2	1	0	0	0	0	1	1	0	1	0	0	0	0	1	0	1	0	0	1	1	0	3
1446	0	18	1	1	161	60	23.1473	1	1	2	3678	3	2	1	0	1	0	0	0	1	1	1	1	0	0	0	1	0	1	1	0	0	1	0	4
1447	0	39	3	2	178	70	22.0932	2	2	2	3812	3	2	0	0	0	0	0	0	0	0	0	1	0	1	0	0	1	0	0	0	0	0	1	1
1448	0	49	4	2	166	53	19.2336	2	2	2	3390	2	2	0	1	1	0	1	1	0	0	0	0	0	0	1	1	0	0	0	0	1	1	1	4
1449	0	75	1	2	171	80	27.3588	1	1	2	3599	3	1	1	0	1	0	0	1	0	0	1	0	1	0	0	0	1	0	1	0	0	1	1	3
1450	0	57	5	1	161	72	27.7767	3	2	2	4163	4	2	1	1	1	0	1	0	1	0	1	1	0	0	1	0	1	0	0	0	1	0	1	3
1451	0	29	2	1	175	79	25.7959	1	1	2	3577	3	2	0	1	0	1	1	0	0	1	1	1	1	0	1	0	0	1	0	0	0	0	1	2
1452	0	17	1	2	156	57	23.4221	3	2	2	2650	1	1	0	0	0	1	0	1	0	0	1	1	0	1	1	0	1	1	0	0	0	0	1	1
1453	0	18	1	1	176	71	22.921	1	1	1	4326	4	1	0	0	1	0	0	1	1	0	1	1	1	0	0	1	1	0	1	0	0	1	1	2
1454	0	18	1	2	167	62	22.231	1	1	1	3125	2	2	0	1	1	0	1	1	0	1	1	0	0	1	0	1	0	1	0	0	1	0	1	4
1455	0	49	4	1	170	55	19.0311	2	2	1	3366	2	2	0	0	0	1	0	0	1	1	0	0	1	0	1	1	0	1	0	0	0	1	1	1
1456	0	39	3	2	158	69	27.6398	2	2	1	3786	3	1	1	1	1	1	0	0	0	0	1	0	1	0	1	1	0	0	0	0	1	1	0	1
1457	0	18	1	2	176	71	22.921	1	1	1	3474	2	2	1	1	1	0	1	1	0	0	0	0	0	0	1	1	0	0	0	0	1	1	1	3
1458	0	38	3	2	171	71	24.281	2	2	1	3292	2	1	1	1	1	1	1	1	0	0	1	1	0	0	0	0	1	0	0	0	1	1	1	4
1459	0	28	2	1	171	70	23.939	3	2	1	3742	3	1	1	0	1	0	0	0	1	1	0	1	0	1	1	1	0	0	1	0	0	1	1	4
1460	0	23	2	2	162	68	25.9107	3	2	1	4479	4	2	0	1	0	0	0	0	0	0	0	0	0	0	0	1	0	0	0	0	1	1	1	4
1461	0	50	4	1	157	61	24.7475	2	2	1	3950	3	2	0	0	0	0	1	1	1	0	0	1	0	0	1	1	0	1	0	0	1	1	0	1
1462	0	33	3	1	176	83	26.7949	1	1	1	4138	4	2	0	0	1	1	1	0	0	0	0	0	0	0	1	0	0	0	0	0	0	0	0	4
1463	0	18	1	1	174	81	26.7539	1	1	1	3475	2	2	1	0	1	1	1	1	0	1	1	0	1	1	1	0	1	0	1	0	0	0	1	2
1464	0	47	4	1	156	45	18.4911	2	2	1	3254	2	1	1	1	1	0	1	0	0	1	0	0	1	1	1	1	1	1	0	0	0	0	0	3
1465	0	18	1	2	167	63	22.5896	1	1	1	3347	2	1	0	0	0	1	1	0	1	1	1	0	1	0	0	1	1	1	0	0	1	1	0	4
1466	0	30	3	1	166	58	21.048	2	2	1	4179	4	1	0	0	0	1	0	0	1	1	0	1	1	0	0	0	0	0	0	0	1	1	0	1
1467	0	41	4	2	163	65	24.4646	2	2	1	2782	1	1	1	1	0	0	1	1	0	1	0	0	1	1	0	1	1	0	1	0	0	0	0	3
1468	0	53	5	2	172	79	26.7036	2	2	1	2563	1	1	0	1	1	1	0	1	1	1	0	0	1	1	1	0	0	1	0	0	0	0	0	4
1469	0	18	1	1	170	55	19.0311	3	2	1	4118	4	1	0	1	1	1	1	1	0	1	1	1	1	0	1	0	0	0	1	0	0	0	1	2
1470	0	29	2	2	157	52	21.0962	3	2	1	3833	3	2	1	0	0	0	1	0	1	0	1	0	0	0	1	0	1	1	0	0	1	1	1	4
1471	0	40	3	1	166	69	25.0399	3	2	1	4068	4	1	1	1	0	0	0	1	0	0	1	1	1	0	0	1	1	1	1	0	1	0	1	4
1472	0	34	3	1	178	59	18.6214	3	2	1	3436	2	2	1	0	0	0	0	0	0	0	0	1	1	0	1	0	1	1	1	0	0	1	0	2
1473	0	29	2	1	176	64	20.6612	3	2	1	3966	3	1	1	0	1	1	1	0	0	0	0	1	0	1	1	0	1	1	0	0	1	1	1	2
1474	0	20	2	1	174	73	24.1115	1	1	1	4267	4	2	0	1	0	1	0	0	0	1	0	1	0	0	0	0	0	1	0	0	0	1	0	2
1475	0	56	5	2	156	64	26.2985	3	2	1	3106	2	1	1	1	0	1	1	1	1	0	0	0	0	0	1	0	0	0	0	0	1	1	0	3
1476	0	50	4	2	171	72	24.623	3	2	1	3550	3	2	1	1	1	0	0	1	0	1	1	1	0	1	1	0	1	0	1	0	0	1	0	1
1477	0	44	4	1	166	63	22.8625	3	2	1	3187	2	2	1	1	0	0	0	1	1	0	0	1	0	0	1	0	1	1	0	0	1	1	0	3
1478	0	40	3	1	156	44	18.0802	3	2	1	3202	2	2	1	0	0	0	1	1	0	0	1	0	1	0	1	1	1	1	0	0	1	1	1	1
1479	0	50	4	2	177	68	21.7051	3	2	1	3718	3	1	1	1	0	0	0	0	0	1	1	0	1	1	1	0	1	1	0	0	1	1	1	1
1480	0	29	2	2	158	66	26.4381	3	2	1	3907	3	2	1	1	0	0	0	0	0	0	1	1	1	0	0	0	0	0	1	0	1	0	0	4
1481	0	18	1	2	163	71	26.7229	3	2	1	3903	3	2	0	1	1	1	0	0	0	0	0	0	1	1	0	0	0	1	1	0	0	0	1	1
1482	0	18	1	1	165	68	24.977	3	2	1	4054	4	1	1	0	1	0	0	1	1	0	0	1	1	0	1	0	0	1	0	0	1	0	0	1
1483	0	49	4	1	176	79	25.5036	3	2	1	3457	2	1	0	0	1	0	1	1	0	0	1	1	1	1	0	1	1	0	1	0	0	1	1	1
1484	0	49	4	1	175	82	26.7755	3	2	1	3163	2	1	1	0	0	1	0	0	0	1	1	0	1	0	1	0	1	1	1	0	1	1	0	4
1485	0	39	3	1	163	60	22.5827	3	2	1	3593	3	2	1	1	0	1	0	0	1	1	0	0	1	1	1	1	0	0	0	0	0	0	1	2
1486	0	48	4	1	167	56	20.0796	3	2	1	2770	1	1	0	0	1	1	0	1	0	1	1	0	1	1	1	1	0	1	0	0	0	0	1	1
1487	0	50	4	2	162	66	25.1486	3	2	1	3855	3	2	1	0	0	1	1	1	0	1	0	1	0	0	1	1	0	0	1	0	1	0	0	3
1488	0	49	4	2	175	68	22.2041	3	2	1	3195	2	1	1	1	0	1	0	1	0	1	1	1	0	0	0	1	0	0	0	0	1	1	1	3
1489	0	40	3	1	170	59	20.4152	3	2	1	2948	1	1	0	0	0	1	0	1	0	1	1	0	1	1	0	0	1	0	0	0	1	0	0	3
1490	0	29	2	1	156	57	23.4221	3	2	1	3755	3	1	0	0	1	0	0	1	1	1	1	1	0	0	1	1	1	0	1	0	0	0	1	2
1491	0	37	3	2	172	66	22.3094	3	2	1	4484	4	2	0	0	0	1	0	0	1	0	0	1	1	0	1	1	1	1	1	0	1	1	1	4
1492	0	50	4	2	165	63	23.1405	3	2	1	3942	3	1	1	1	0	0	1	1	1	0	1	1	1	0	0	1	1	0	0	0	0	0	1	2
1493	0	49	4	2	159	64	25.3155	3	2	1	3250	2	1	0	0	1	0	0	1	1	0	1	0	0	0	1	1	0	0	0	0	1	1	1	2
1494	0	50	4	1	166	61	22.1367	3	2	1	3855	3	2	1	1	1	1	0	0	0	1	0	0	1	0	1	0	1	0	0	0	1	0	1	3
1495	0	50	4	2	178	75	23.6713	3	2	1	3600	3	1	1	1	1	0	0	1	1	1	1	0	1	1	0	0	0	1	0	0	1	0	0	2
1496	0	29	2	1	164	69	25.6544	1	1	1	3151	2	2	0	0	1	0	0	0	1	0	1	0	1	0	1	1	0	1	0	0	1	1	0	2
1497	0	50	4	2	174	55	18.1662	3	2	1	3921	3	2	0	0	1	0	1	0	0	1	1	1	1	0	0	1	1	0	0	0	1	0	1	4
1498	0	18	1	1	174	83	27.4145	1	1	1	3282	2	1	0	1	0	1	1	0	1	1	0	0	1	1	1	0	0	0	1	0	0	1	0	4
1499	0	49	4	2	170	63	21.7993	3	2	1	3422	2	2	1	1	1	0	0	0	0	1	1	1	0	0	1	1	0	1	1	0	1	1	1	3
1500	0	18	1	2	173	65	21.7181	1	1	1	3685	3	1	0	0	1	1	0	0	0	0	0	0	0	0	0	0	1	1	0	0	1	0	1	1
1501	0	29	2	1	166	68	24.677	3	2	1	3772	3	2	0	1	0	0	1	1	1	0	0	0	0	1	1	0	1	0	0	0	0	0	1	1
1502	0	50	5	2	178	78	24.6181	3	2	1	4038	4	2	0	0	0	0	0	1	0	1	0	0	0	0	0	1	0	0	1	0	0	1	1	4
1503	0	50	5	1	155	58	24.1415	3	2	1	4033	4	1	0	1	0	1	1	1	0	0	0	1	0	0	1	0	1	1	0	0	0	0	1	2
1504	0	49	4	1	171	70	23.939	1	1	1	3271	2	2	0	0	1	0	1	0	0	0	0	0	0	1	0	0	1	0	1	0	1	1	1	2
1505	0	39	3	2	175	61	19.9184	1	1	1	3645	3	2	0	1	1	0	0	0	1	0	0	0	0	0	1	1	0	0	1	0	1	1	1	4
1506	0	49	4	2	175	74	24.1633	1	1	1	3426	2	1	0	1	1	1	0	0	1	0	0	0	1	0	0	0	1	1	1	0	0	0	1	2
1507	0	50	4	2	169	57	19.9573	3	2	1	3824	3	2	1	1	1	0	0	1	0	0	0	1	0	1	1	1	0	1	0	0	0	0	0	3
1508	0	18	1	2	157	50	20.2848	3	2	1	3069	2	1	1	1	0	1	0	1	1	0	1	1	0	0	0	1	1	0	0	0	0	0	0	1
1509	0	18	1	1	167	73	26.1752	3	2	1	3455	2	2	0	1	1	0	0	1	0	0	1	1	0	1	1	0	1	1	0	0	1	0	0	4
1510	0	29	2	2	162	59	22.4813	3	2	1	3368	2	1	1	1	1	0	0	0	0	0	1	0	1	1	1	1	1	0	0	0	0	0	1	3
1511	0	39	3	1	167	61	21.8724	3	2	1	3992	3	2	0	0	1	0	1	0	0	1	1	1	0	0	0	1	0	1	1	0	1	1	1	1
1512	0	68	5	1	157	56	22.719	3	2	1	4330	4	2	0	0	0	0	1	1	0	1	0	0	1	1	1	0	1	1	0	0	1	0	0	3
1513	0	39	3	1	178	64	20.1995	3	2	1	2548	1	1	0	0	0	0	1	1	0	1	1	0	1	1	0	0	0	0	1	0	1	1	1	3
1514	0	49	4	2	156	58	23.833	1	1	1	3051	2	1	0	0	1	0	1	0	0	0	1	1	0	0	0	1	0	0	1	0	0	1	1	3
1515	0	49	4	2	172	71	23.9995	3	2	1	3423	2	1	1	0	1	0	1	0	1	0	0	1	0	0	1	0	1	1	1	0	0	1	1	3
1516	0	39	3	2	161	59	22.7615	3	2	1	3816	3	2	1	1	0	0	1	1	1	0	0	1	0	1	0	0	1	1	0	0	0	0	0	1
1517	0	39	3	1	164	61	22.68	3	2	1	4387	4	1	1	1	1	0	1	1	0	1	1	0	0	1	0	1	0	0	1	0	0	1	1	1
1518	0	33	3	1	161	59	22.7615	3	2	1	4415	4	1	1	1	0	1	1	1	1	1	1	1	0	0	1	0	0	1	1	0	0	1	1	1
1519	0	13	1	1	163	62	23.3355	3	2	1	2964	1	1	0	1	0	0	0	0	1	0	0	1	0	1	0	0	1	1	0	0	0	0	0	1
1520	0	39	3	2	169	65	22.7583	3	2	1	3501	3	2	0	0	1	0	1	0	1	0	0	0	0	1	0	1	0	1	0	0	0	1	1	3
1521	0	39	3	2	161	49	18.9036	3	2	1	3506	3	2	0	0	1	0	0	0	1	0	1	0	1	1	0	1	0	1	0	0	0	0	1	4
1522	0	39	3	1	161	66	25.462	1	1	1	4164	4	2	0	0	1	0	1	0	1	1	0	0	0	0	1	1	1	1	1	0	0	1	0	1
1523	0	29	2	2	161	65	25.0762	3	2	1	3757	3	1	1	1	0	1	0	0	1	1	0	1	1	0	1	1	1	0	0	0	1	0	0	1
1524	0	50	4	1	171	78	26.6749	3	2	1	3577	3	1	0	0	1	0	0	0	0	1	1	0	1	0	1	0	1	1	0	0	0	1	1	2
1525	0	18	2	2	173	69	23.0546	4	3	1	2633	1	2	1	0	0	1	1	0	0	1	1	0	1	1	0	0	1	0	1	0	1	1	0	1
1526	0	32	3	2	169	68	23.8087	4	3	1	4266	4	2	1	0	0	1	1	1	0	0	0	1	1	0	0	1	1	0	1	0	0	0	0	3
1527	0	50	4	1	157	62	25.1532	3	2	1	3968	3	2	1	0	0	1	0	1	0	1	1	0	0	0	0	1	1	0	1	0	0	0	1	3
1528	0	14	1	2	174	62	20.4783	3	2	1	3899	3	1	1	0	1	0	1	0	0	0	1	0	1	1	0	0	1	1	1	0	1	0	1	3
1529	0	59	5	1	161	46	17.7462	1	1	1	4103	4	2	0	1	1	0	1	0	0	0	0	0	0	1	0	1	0	0	1	0	0	0	1	2
1530	0	38	3	2	170	57	19.7232	1	1	1	3251	2	1	0	1	1	1	0	0	0	0	1	0	0	0	0	0	1	1	1	0	0	1	0	4
1531	0	40	3	1	157	54	21.9076	3	2	1	3740	3	2	0	0	0	0	1	1	0	1	1	1	0	1	1	1	0	0	1	0	0	0	1	4
1532	0	17	1	1	176	74	23.8895	1	1	1	3225	2	1	0	1	0	1	0	0	1	1	0	0	0	0	0	1	1	1	1	0	1	1	0	1
1533	0	62	5	2	172	58	19.6052	2	2	1	4279	4	2	0	1	1	1	0	1	0	1	0	0	1	0	0	1	1	1	0	0	0	1	1	1
1534	0	40	3	1	159	65	25.711	4	3	1	4041	4	2	0	1	1	0	0	0	0	0	1	1	0	1	1	1	1	1	1	0	0	0	1	3
1535	0	69	5	1	155	48	19.9792	2	2	1	3042	2	1	0	1	0	1	1	1	1	1	0	1	1	0	0	0	1	1	0	0	0	1	1	1
1536	0	29	2	1	178	81	25.565	4	3	1	3909	3	2	0	1	1	0	1	1	1	0	1	1	1	1	1	0	0	1	0	0	1	0	0	3
1537	0	41	4	2	171	79	27.0169	2	2	1	3400	2	2	1	1	1	0	1	0	0	0	1	0	1	0	1	0	1	1	1	0	1	1	0	1
1538	0	29	2	1	170	65	22.4913	4	3	1	3936	3	2	1	0	1	1	1	0	1	0	0	0	1	0	0	0	1	0	0	0	0	0	0	3
1539	0	38	3	2	175	71	23.1837	2	2	1	3392	2	2	1	0	0	1	0	0	0	1	1	1	0	0	1	0	0	0	0	0	1	1	1	4
1540	0	39	3	2	165	67	24.6097	2	2	1	3845	3	1	0	0	1	1	1	1	1	1	1	1	0	1	1	0	1	1	1	0	0	0	0	2
1541	0	50	4	2	173	62	20.7157	2	2	1	3793	3	1	1	0	0	0	1	1	1	1	0	1	0	1	1	1	0	0	0	0	1	1	0	3
1542	0	39	3	2	158	49	19.6283	4	3	1	3676	3	2	1	0	0	1	0	1	0	0	0	0	0	0	0	0	0	0	1	0	1	1	1	4
1543	0	30	3	1	169	79	27.6601	2	2	1	4234	4	1	1	0	1	1	1	1	0	0	0	1	0	1	1	0	1	0	1	0	1	0	0	3
1544	0	18	1	1	166	71	25.7657	1	1	1	3119	2	2	0	0	1	1	0	0	0	0	0	1	0	0	0	0	1	1	1	0	1	1	1	1
1545	0	50	4	2	177	68	21.7051	1	1	1	3937	3	2	0	0	1	1	0	0	0	1	1	0	0	0	1	1	1	1	0	0	0	0	1	3
1546	0	29	2	2	178	82	25.8806	4	3	1	3564	3	1	0	1	1	1	0	0	0	0	0	1	0	0	1	1	0	0	1	0	0	1	1	2
1547	0	29	2	1	169	70	24.5089	4	3	1	3384	2	2	1	1	0	1	1	0	0	1	0	0	1	1	1	0	1	0	1	0	0	1	1	4
1548	0	75	1	2	162	58	22.1003	1	1	1	3768	3	2	0	0	0	1	0	0	1	0	1	0	0	0	1	1	1	1	1	0	1	1	1	4
1549	0	18	2	1	175	73	23.8367	3	2	1	4051	4	2	0	0	1	1	0	0	1	1	1	1	0	0	0	1	0	0	0	0	0	0	1	4
1550	0	29	2	1	176	79	25.5036	4	3	1	3870	3	1	1	0	1	1	1	0	1	1	0	1	1	1	0	0	1	0	0	0	0	1	0	4
1551	0	18	2	1	157	65	26.3702	4	3	1	3263	2	2	0	1	1	0	0	1	1	1	0	1	1	1	0	1	0	1	0	0	1	1	0	2
1552	0	39	3	1	174	74	24.4418	4	3	1	3769	3	2	1	0	1	1	1	1	0	0	0	1	0	0	1	0	0	0	0	0	1	0	1	4
1553	0	26	1	1	174	65	21.4692	3	2	1	2748	1	1	0	0	0	1	1	0	1	0	1	0	1	0	0	0	0	1	0	0	1	1	0	3
1554	0	39	3	2	158	63	25.2363	4	3	1	3897	3	2	0	1	0	0	1	0	0	1	0	1	0	1	1	1	0	1	1	0	1	1	1	2
1555	0	38	3	2	160	62	24.2188	2	2	1	3355	2	1	1	0	0	1	1	1	0	0	1	0	0	1	1	1	0	0	0	0	1	1	0	2
1556	0	39	3	1	174	68	22.46	4	3	1	3148	2	2	0	0	0	1	0	1	1	0	0	1	0	0	1	0	0	1	0	0	1	1	0	1
1557	0	69	5	1	163	60	22.5827	2	2	1	3266	2	2	1	0	0	0	0	0	0	0	1	1	0	1	1	0	0	1	0	0	1	1	1	2
1558	0	30	2	1	159	52	20.5688	3	2	1	3937	3	1	0	1	1	1	0	0	0	0	0	0	0	0	0	0	0	0	0	0	0	0	0	4
1559	0	50	4	1	173	54	18.0427	2	2	1	3612	3	1	0	1	0	1	0	0	1	0	1	1	1	0	1	1	1	1	1	0	0	1	1	4
1560	0	72	5	1	171	58	19.8352	2	2	1	3613	3	1	0	0	1	0	0	1	0	0	0	1	0	0	1	0	0	0	0	0	0	0	0	1
1561	0	29	2	1	160	52	20.3125	1	1	1	3897	3	2	0	1	0	1	1	0	0	0	1	1	0	0	1	0	1	1	0	0	0	1	0	3
1562	0	29	2	2	167	54	19.3625	4	3	1	3773	3	1	1	1	0	0	1	0	1	1	0	0	0	0	1	1	1	1	1	0	0	1	1	4
1563	0	50	4	2	169	74	25.9095	2	2	1	3527	3	1	1	1	1	0	1	0	0	1	0	0	1	0	1	1	0	1	1	0	1	1	1	2
1564	0	25	2	1	168	75	26.5731	3	2	1	4439	4	2	0	1	0	1	1	1	1	0	1	0	0	1	0	0	1	0	0	0	1	1	0	4
1565	0	18	1	2	162	70	26.6728	1	1	1	3866	3	1	1	0	0	0	1	1	0	0	1	1	0	1	1	1	1	0	0	0	0	0	0	4
1566	0	39	3	2	173	72	24.0569	2	2	1	3696	3	2	0	0	0	1	1	1	0	0	0	1	0	1	0	1	1	1	1	0	0	1	0	4
1567	0	18	2	2	156	63	25.8876	4	3	1	3276	2	1	1	1	0	0	1	0	0	1	1	1	1	1	0	0	1	1	0	0	1	1	1	2
1568	0	39	3	1	166	57	20.6852	2	2	1	3038	2	1	0	1	1	1	0	1	1	0	0	1	0	1	0	1	1	0	0	0	0	1	1	3
1569	0	29	2	2	167	68	24.3824	4	3	1	3956	3	1	1	0	0	0	1	1	0	1	0	1	0	0	1	1	0	0	0	0	1	0	0	2
1570	0	18	1	1	175	72	23.5102	3	2	1	3055	2	2	0	1	0	0	1	0	0	0	1	1	1	1	1	1	1	1	1	0	1	1	#NULL!	2
1571	0	75	5	2	158	45	18.026	3	2	1	3558	3	1	0	0	0	1	0	0	1	1	1	1	1	0	1	1	1	0	1	0	0	1	#NULL!	1
1572	0	62	5	2	163	49	18.4425	3	2	1	3307	2	2	1	0	1	1	1	1	0	0	1	0	0	0	0	0	1	0	1	1	0	1	#NULL!	2
1573	0	70	5	1	176	72	23.2438	1	1	1	4268	4	2	0	1	1	0	1	0	1	0	1	1	0	1	1	0	1	1	0	0	1	0	#NULL!	4
1574	0	56	5	1	167	72	25.8166	3	2	1	3219	2	1	1	1	1	1	1	1	0	1	1	1	0	0	0	1	0	1	1	1	0	1	#NULL!	2
1575	0	50	4	1	170	72	24.9135	1	1	1	3832	3	2	0	1	1	1	0	0	0	1	0	1	1	1	1	1	0	1	1	0	1	1	#NULL!	1
1576	0	29	2	1	173	63	21.0498	3	2	1	3240	2	1	1	1	1	1	1	1	0	0	1	1	1	0	1	1	1	0	0	1	0	1	#NULL!	2
1577	0	39	3	2	160	69	26.9531	3	2	1	3800	3	2	1	1	1	0	0	1	0	0	0	0	1	1	1	0	0	0	1	1	1	0	#NULL!	4
1578	0	75	5	2	156	59	24.2439	3	2	1	3766	3	1	1	1	1	1	1	1	1	1	0	0	0	1	0	0	0	0	0	1	1	0	#NULL!	3
1579	0	40	3	2	166	67	24.3141	3	2	1	3634	3	2	0	0	0	1	0	0	0	0	0	1	0	0	1	0	1	1	1	0	0	0	#NULL!	1
1580	0	27	2	1	168	58	20.5499	1	1	1	3470	2	2	0	1	0	0	1	0	1	1	0	0	0	1	0	1	0	1	0	0	1	0	#NULL!	3
1581	0	18	1	2	169	56	19.6072	3	2	1	4207	4	1	0	0	0	1	0	0	0	0	0	1	0	0	1	1	0	1	0	0	0	0	#NULL!	3
1582	0	29	2	1	160	47	18.3594	3	2	1	4029	4	2	1	1	1	1	1	1	1	0	1	1	0	1	1	1	0	1	0	1	1	0	#NULL!	2
1583	0	18	1	1	174	57	18.8268	3	2	1	2538	1	1	1	1	1	1	1	1	0	0	0	0	0	0	1	0	0	0	1	1	0	0	#NULL!	4
1584	0	76	1	1	160	63	24.6094	1	1	1	3750	3	2	0	0	1	1	1	0	0	1	0	0	0	0	1	1	1	0	1	1	0	0	#NULL!	2
1585	0	55	5	1	175	61	19.9184	3	2	1	4332	4	1	1	1	1	1	1	1	0	0	0	1	1	1	0	0	1	1	1	0	1	1	#NULL!	3
1586	0	17	1	1	165	52	19.1001	3	2	1	3052	2	1	0	1	0	0	0	0	1	1	0	1	1	0	1	1	0	0	1	0	0	0	#NULL!	4
1587	0	29	2	1	173	80	26.7299	1	1	1	4373	4	2	0	1	1	1	1	0	1	0	1	0	1	1	1	0	1	0	0	0	1	1	#NULL!	3
1588	0	52	5	1	173	72	24.0569	1	1	1	4197	4	2	0	1	1	0	1	0	0	0	1	0	0	0	1	1	1	0	0	0	0	0	#NULL!	4
1589	0	27	2	1	159	61	24.1288	3	2	1	3124	2	2	1	1	1	0	0	1	1	1	0	1	1	0	0	0	0	1	1	0	0	0	#NULL!	4
1590	0	23	2	2	163	61	22.9591	3	2	1	4432	4	2	0	1	0	0	0	0	1	0	1	0	0	1	0	0	0	0	0	0	1	0	#NULL!	2
1591	0	38	3	2	178	72	22.7244	2	2	1	3059	2	1	1	1	1	0	1	1	0	1	0	0	0	1	1	1	1	0	1	0	1	0	#NULL!	3
1592	0	18	1	1	174	65	21.4692	4	3	1	3024	2	2	0	1	0	0	0	0	0	0	0	0	0	0	0	0	1	1	0	1	0	1	#NULL!	3
1593	0	55	5	1	174	76	25.1024	3	2	1	2620	1	1	1	0	1	0	0	1	0	1	0	1	0	1	0	0	1	1	1	1	1	1	#NULL!	4
1594	0	29	2	1	171	67	22.913	3	2	1	3101	2	1	0	1	0	0	0	0	1	0	0	1	0	1	0	1	1	1	1	1	1	1	#NULL!	3
1595	0	58	5	1	155	64	26.6389	1	1	1	4192	4	1	0	1	1	1	1	0	0	0	0	1	0	0	0	0	1	1	1	1	0	0	#NULL!	1
1596	0	18	2	2	172	65	21.9713	3	2	1	4443	4	1	0	1	0	1	1	0	1	0	0	1	1	1	0	0	0	1	0	0	1	1	#NULL!	4
1597	0	39	3	1	168	62	21.9671	4	3	1	3615	3	1	1	0	1	0	0	1	1	0	0	1	1	0	1	0	0	0	0	0	0	0	#NULL!	3
1598	0	50	5	2	164	61	22.68	3	2	1	4101	4	2	0	0	0	1	1	0	1	1	1	1	0	1	0	0	1	1	1	0	1	1	#NULL!	3
1599	0	29	2	1	157	58	23.5304	3	2	1	3632	3	2	1	0	1	0	0	1	1	1	1	1	0	0	1	0	0	1	0	0	0	0	#NULL!	4
1600	0	18	1	1	171	75	25.6489	1	1	1	3477	2	2	0	0	0	1	0	0	1	1	1	1	0	0	1	0	0	0	0	0	0	1	#NULL!	4
1601	0	51	5	2	173	66	22.0522	1	1	1	4324	4	2	0	0	1	0	1	0	0	0	1	1	1	0	1	0	1	1	0	1	0	0	#NULL!	4
1602	0	29	2	2	167	61	21.8724	4	3	1	3541	3	2	0	1	0	1	1	0	0	0	1	1	1	1	0	0	0	1	0	0	1	0	#NULL!	1
1603	0	31	3	2	163	70	26.3465	2	2	1	3000	1	1	1	0	1	0	0	1	1	1	0	1	1	0	1	1	0	0	0	0	0	1	#NULL!	2
1604	0	66	5	1	170	78	26.9896	2	2	1	4204	4	2	1	1	1	0	0	1	0	0	0	0	0	1	1	1	1	1	0	1	1	0	#NULL!	2
1605	0	29	2	2	171	77	26.3329	3	2	1	3171	2	1	1	1	1	1	1	1	0	1	1	0	0	1	0	1	1	0	1	1	1	1	#NULL!	3
1606	0	39	3	1	167	74	26.5338	1	1	1	3648	3	1	0	1	0	0	1	0	1	1	1	1	1	0	1	0	0	0	1	1	0	1	#NULL!	4
1607	0	30	3	1	161	57	21.9899	1	1	1	2561	1	1	0	1	1	1	1	0	0	1	1	0	0	1	1	0	0	1	0	0	1	0	#NULL!	1
1608	0	63	5	1	163	48	18.0662	2	2	1	3121	2	2	1	0	1	0	0	1	1	0	0	1	0	0	1	0	1	0	1	0	0	1	#NULL!	4
1609	0	39	3	2	168	68	24.093	2	2	1	3918	3	2	0	1	0	0	1	0	0	0	1	1	1	0	1	1	0	0	0	0	0	1	#NULL!	3
1610	0	51	5	2	157	67	27.1816	2	2	1	4299	4	2	0	0	0	1	0	0	0	1	1	0	1	0	0	1	0	1	0	0	0	1	#NULL!	4
1611	0	18	1	2	166	53	19.2336	1	1	1	3964	3	2	0	0	0	1	0	0	0	0	0	0	1	0	0	1	0	0	0	1	0	1	#NULL!	1
1612	0	50	4	2	171	67	22.913	2	2	1	3993	3	2	0	0	0	1	0	0	1	1	0	0	1	1	0	1	1	0	0	1	1	0	#NULL!	2
1613	0	36	3	2	177	71	22.6627	2	2	1	2713	1	2	1	0	1	0	1	1	1	1	1	1	0	1	0	0	1	1	0	1	1	0	#NULL!	1
1614	0	50	4	1	155	55	22.8928	3	2	1	3990	3	2	1	1	0	1	0	0	1	0	1	1	0	0	1	1	1	1	1	0	1	1	0	3
1615	0	29	2	1	159	63	24.9199	3	2	1	3607	3	2	1	0	1	1	1	0	1	0	0	0	0	1	1	0	1	0	1	0	1	1	0	2
1616	0	13	1	1	138	38	19.9538	1	1	1	2512	1	1	0	0	1	1	0	0	0	0	1	0	0	0	1	0	1	1	0	0	1	0	0	2
1617	0	39	3	1	169	67	23.4586	3	2	1	3737	3	2	1	1	1	1	0	0	1	1	1	0	1	1	1	0	0	1	0	0	0	1	1	1
1618	0	29	2	2	162	56	21.3382	3	2	1	3159	2	2	1	0	1	0	1	0	0	1	0	0	1	1	0	1	0	1	1	0	1	0	1	4
1619	0	50	4	1	175	71	23.1837	3	2	1	3927	3	2	0	1	1	0	0	1	0	0	0	1	1	0	1	0	1	0	1	0	0	0	0	1
1620	0	40	3	1	169	51	17.8565	3	2	1	3540	3	2	1	1	0	1	0	1	1	1	1	0	1	1	1	0	0	0	0	0	0	0	1	3
1621	0	39	3	2	167	58	20.7967	4	3	1	3584	3	2	1	0	0	1	1	0	0	0	0	0	1	0	1	0	0	0	1	0	0	0	1	1
1622	0	54	5	1	158	62	24.8358	2	2	1	4425	4	1	1	1	0	1	1	1	1	1	1	0	1	1	1	0	0	1	1	0	0	1	0	1
1623	0	49	4	1	159	57	22.5466	3	2	1	3396	2	2	1	0	1	0	1	1	1	1	1	0	1	1	0	1	1	0	1	0	0	0	1	4
1624	0	18	1	1	166	62	22.4996	1	1	1	3532	3	2	0	0	0	1	1	0	1	0	1	0	1	0	0	0	1	0	0	0	1	1	1	4
1625	0	18	1	2	171	62	21.2031	3	2	1	4162	4	1	0	0	1	0	1	0	1	0	1	1	0	0	1	0	0	1	0	0	0	1	0	4
1626	0	39	3	2	169	67	23.4586	3	2	1	3805	3	1	1	1	1	0	1	1	0	1	1	0	1	1	1	1	1	0	1	0	1	0	1	2
1627	0	25	2	1	158	59	23.634	3	2	1	2942	1	1	0	1	0	1	1	1	1	0	1	0	0	0	1	0	1	0	1	0	0	0	1	1
1628	0	29	2	2	156	52	21.3675	3	2	1	4498	4	2	1	1	1	0	1	0	1	0	0	1	0	0	1	0	1	1	1	0	0	1	0	3
1629	0	49	4	1	178	62	19.5682	3	2	1	3250	2	2	1	0	0	1	1	0	0	0	0	0	1	1	1	0	0	1	1	0	0	0	0	2
1630	0	39	3	1	159	70	27.6888	3	2	1	3782	3	1	0	0	0	1	1	0	1	0	1	1	1	0	0	0	1	0	1	0	1	0	0	3
1631	0	39	3	2	175	69	22.5306	1	1	1	3812	3	2	0	1	1	0	0	0	0	1	0	0	1	0	1	1	1	1	1	0	1	0	0	4
1632	0	18	1	1	176	84	27.1178	3	2	1	3284	2	1	1	1	0	0	1	1	1	0	0	1	0	0	1	0	0	0	1	0	1	0	1	3
1633	0	29	2	2	176	75	24.2123	1	1	1	3823	3	1	0	0	1	0	0	0	0	0	0	1	1	0	1	0	0	0	1	0	0	0	1	3
1634	0	29	2	2	165	65	23.8751	1	1	1	3863	3	1	0	1	1	1	1	0	1	0	1	1	1	0	1	1	1	1	1	0	0	0	1	2
1635	0	39	3	1	169	66	23.1084	1	1	1	3531	3	2	0	0	1	1	1	0	1	1	1	0	1	1	1	1	1	0	0	0	0	1	0	3
1636	0	49	4	2	165	73	26.8136	2	2	1	3066	2	1	0	1	1	0	1	0	1	1	1	0	0	1	0	1	1	0	0	0	1	0	0	4
1637	0	18	1	2	163	54	20.3244	1	1	1	3813	3	2	1	0	1	1	0	1	1	0	1	1	0	0	1	0	1	0	0	0	1	1	0	2
1638	0	31	3	2	164	55	20.4491	2	2	1	2624	1	1	0	0	0	0	0	1	0	0	0	0	1	1	1	0	0	0	1	0	1	0	0	2
1639	0	39	3	1	169	61	21.3578	1	1	1	3599	3	2	0	1	0	0	1	0	1	1	0	1	1	0	1	0	1	0	0	0	0	1	0	1
1640	0	34	3	2	159	59	23.3377	3	2	1	3193	2	2	0	0	1	0	1	0	0	0	1	0	0	1	1	1	1	0	0	0	1	0	1	3
1641	0	50	4	1	168	65	23.03	3	2	1	3761	3	1	1	0	1	0	1	0	0	1	0	0	0	0	1	0	0	0	1	0	0	1	0	1
1642	0	18	1	1	173	78	26.0617	3	2	1	3182	2	2	0	0	0	1	1	1	0	0	0	1	0	0	0	0	1	0	1	0	0	0	0	2
1643	0	24	2	1	179	60	18.726	3	2	1	3148	2	2	1	1	0	1	1	0	1	1	1	0	0	0	1	0	1	1	1	0	0	1	1	4
1644	0	39	3	2	161	67	25.8478	3	2	1	3950	3	2	0	0	0	1	1	1	0	1	0	0	1	1	1	1	1	0	0	0	1	0	1	3
1645	0	30	2	1	174	66	21.7994	3	2	1	3645	3	1	0	1	0	1	0	1	1	0	0	0	0	0	1	1	1	1	1	0	0	0	1	1
1646	0	64	5	1	160	55	21.4844	2	2	1	4293	4	2	1	1	1	0	1	0	1	0	1	0	1	0	1	0	0	0	0	0	1	1	1	1
1647	0	39	3	1	174	59	19.4874	4	3	1	3101	2	2	0	1	1	0	1	0	1	1	0	0	1	0	1	1	0	1	0	0	0	0	1	2
1648	0	29	2	1	162	50	19.052	3	2	1	3632	3	1	0	0	1	0	0	0	0	1	0	0	0	1	1	0	0	1	1	0	0	1	1	4
1649	0	29	2	1	176	80	25.8264	3	2	2	4342	4	2	1	1	1	1	1	0	0	0	0	0	1	0	1	0	1	0	0	0	0	1	1	1
1650	0	29	2	1	174	66	21.7994	4	3	2	3693	3	2	0	1	0	0	1	1	1	1	0	1	0	0	1	1	0	0	0	0	0	1	0	3
1651	0	29	2	1	162	67	25.5296	1	1	2	3453	2	1	0	1	0	1	0	0	1	1	0	0	0	0	1	1	0	1	1	0	0	1	1	3
1652	0	29	2	1	163	53	19.9481	3	2	2	3639	3	2	1	0	0	1	1	1	0	1	0	1	0	1	0	1	1	0	0	0	1	0	1	3
1653	0	39	3	1	164	69	25.6544	3	2	2	3323	2	2	0	0	0	1	0	1	1	0	1	1	1	0	0	1	1	0	1	0	0	1	0	1
1654	0	49	4	2	178	57	17.9902	3	2	2	3137	2	1	0	0	0	1	0	1	1	0	0	1	1	1	1	1	1	1	1	0	0	0	0	3
1655	0	18	1	2	176	58	18.7242	3	2	2	3132	2	1	1	0	1	1	0	0	0	1	1	1	0	1	1	0	0	0	1	0	0	1	0	2
1656	0	29	2	1	157	65	26.3702	3	2	2	3704	3	1	0	1	1	0	0	1	1	1	0	1	1	0	0	0	1	0	1	0	1	0	0	3
1657	0	49	4	1	159	62	24.5243	3	2	2	3301	2	2	1	1	0	1	0	1	1	1	1	1	1	0	1	0	0	1	0	0	0	0	1	1
1658	0	39	3	1	168	54	19.1327	3	2	2	3126	2	1	1	1	0	1	0	1	1	0	1	0	0	0	1	0	1	1	0	0	0	1	1	4
1659	0	29	2	1	175	76	24.8163	3	2	2	3575	3	2	0	0	0	0	1	1	0	0	0	0	1	1	1	0	1	1	0	0	0	1	1	1
1660	0	38	3	1	177	78	24.8971	3	2	2	3069	2	2	1	1	0	0	1	0	0	0	0	0	1	0	1	0	0	0	0	0	1	0	0	2
1661	0	39	3	2	171	71	24.281	3	2	2	3563	3	1	1	1	1	0	0	0	0	0	0	1	0	0	0	1	0	0	0	0	1	0	1	2
1662	0	56	5	2	164	59	21.9363	3	2	2	4311	4	2	1	1	0	1	1	0	0	1	1	0	0	0	0	1	1	0	0	0	1	0	0	3
1663	0	28	2	1	174	70	23.1206	3	2	2	3184	2	2	1	0	1	0	1	1	1	0	1	1	0	0	0	1	1	0	0	0	1	0	1	4
1664	0	18	1	2	169	64	22.4082	1	1	2	3644	3	1	0	1	0	1	1	0	1	0	0	1	0	1	0	0	0	1	0	0	1	0	1	3
1665	0	39	3	2	163	65	24.4646	3	2	2	3232	2	1	1	0	1	0	0	1	1	1	1	1	1	1	0	1	0	1	0	0	0	0	0	3
1666	0	39	3	1	178	73	23.04	3	2	2	3904	3	2	1	0	0	0	1	0	1	1	1	1	0	1	1	1	1	0	1	0	0	0	0	1
1667	0	50	4	1	156	62	25.4767	3	2	2	3817	3	1	1	0	1	1	1	1	1	1	0	0	1	0	0	1	1	0	1	0	0	1	0	2
1668	0	39	3	1	170	65	22.4913	3	2	2	3064	2	1	0	0	1	0	0	0	0	0	1	0	0	1	0	0	1	1	0	0	0	0	1	2
1669	0	18	1	1	165	65	23.8751	3	2	2	3526	3	2	1	1	0	1	0	0	0	0	1	1	1	1	1	1	1	0	1	0	1	0	0	1
1670	0	50	4	2	172	56	18.9292	2	2	2	3907	3	2	0	0	0	0	0	0	1	0	1	1	1	0	0	0	0	0	1	0	1	0	0	4
1671	0	60	5	2	157	68	27.5873	2	2	2	3102	2	1	1	0	1	1	1	0	1	0	0	0	0	1	1	1	0	0	0	0	0	1	0	4
1672	0	18	1	2	157	57	23.1247	1	1	2	3533	3	2	1	0	0	0	0	0	0	1	1	1	1	1	1	0	0	0	1	0	1	0	1	2
1673	0	18	1	2	164	71	26.398	3	2	2	3863	3	1	0	1	1	0	1	0	1	1	0	0	0	1	1	0	1	1	1	0	0	0	0	4
1674	0	50	4	2	165	74	27.1809	2	2	2	3543	3	2	0	0	0	1	0	0	0	0	0	1	0	0	1	0	0	1	0	0	1	1	0	1
1675	0	29	2	2	177	82	26.1738	1	1	2	3517	3	2	0	1	0	1	1	0	0	0	1	1	1	0	0	0	0	1	0	1	0	1	#NULL!	4
1676	0	76	1	1	157	58	23.5304	1	1	2	3721	3	2	0	0	0	0	0	0	1	1	1	1	0	1	1	1	0	1	0	0	1	1	#NULL!	4
1677	0	12	1	2	138	38	19.9538	1	1	2	3142	2	2	0	0	0	1	1	0	0	0	0	1	1	0	1	1	0	0	1	1	0	0	#NULL!	4
1678	0	41	4	2	166	55	19.9594	3	2	2	2828	1	1	1	0	1	1	0	1	1	0	0	0	1	1	1	1	1	0	0	1	1	1	#NULL!	4
1679	0	50	4	2	157	61	24.7475	3	2	2	3540	3	1	1	1	1	1	1	1	0	1	1	0	0	1	0	1	1	1	0	1	1	0	#NULL!	4
1680	0	49	4	1	157	56	22.719	3	2	2	3472	2	2	0	1	0	0	1	0	1	1	1	1	1	1	0	1	1	0	1	0	1	1	#NULL!	3
1681	0	30	2	1	165	59	21.6713	1	1	2	3898	3	1	0	0	1	1	1	0	0	1	0	1	1	0	0	0	0	1	1	0	0	1	#NULL!	4
1682	0	50	5	2	168	78	27.6361	3	2	2	3424	2	1	0	1	0	1	1	0	0	1	1	1	0	0	0	0	0	0	1	1	0	0	#NULL!	4
1683	0	62	5	2	160	64	25	3	2	2	4211	4	1	0	0	0	0	0	0	1	0	0	0	0	1	1	1	0	1	0	0	1	0	#NULL!	3
1684	0	22	2	2	168	77	27.2817	1	1	2	4481	4	2	0	0	0	0	0	0	0	1	1	0	1	0	1	1	1	0	0	0	0	0	#NULL!	3
1685	0	30	3	1	163	55	20.7008	3	2	2	4000	4	2	1	0	1	0	1	1	1	1	1	1	0	0	0	1	0	0	1	1	0	0	#NULL!	3
1686	0	33	3	1	162	54	20.5761	3	2	2	2558	1	1	1	0	1	1	1	1	1	0	0	0	1	1	1	0	1	1	0	1	1	0	#NULL!	4
1687	0	30	2	1	178	80	25.2493	1	1	2	3626	3	2	0	0	0	0	1	0	0	0	1	1	1	0	1	1	0	1	0	0	1	0	1	3
1688	0	51	5	1	171	83	28.3848	2	2	2	4143	4	2	0	1	0	0	0	0	0	1	1	1	1	1	1	1	1	1	0	0	0	0	0	4
1689	0	20	2	1	180	61	18.8272	3	2	2	3039	2	1	1	1	0	1	0	0	0	1	0	0	1	0	0	1	0	0	1	0	0	1	0	2
1690	0	50	4	1	176	68	21.9525	3	2	2	3870	3	1	1	0	1	0	1	1	1	0	1	0	1	1	0	0	0	1	1	0	1	0	0	1
1691	0	27	2	1	177	75	23.9395	3	2	2	3200	2	2	0	1	0	1	1	0	0	0	0	1	1	0	0	0	1	0	0	0	0	1	0	3
1692	0	58	5	2	174	69	22.7903	3	2	2	3490	2	2	0	0	1	1	0	1	1	0	0	0	0	0	1	1	1	1	1	0	0	1	1	2
1693	0	34	3	1	172	57	19.2672	3	2	2	2764	1	1	0	1	1	0	1	0	1	1	0	0	1	0	0	1	0	1	1	0	1	1	0	1
1694	0	49	4	1	160	49	19.1406	3	2	2	3034	2	2	1	0	0	0	1	0	1	1	0	0	0	1	1	1	0	0	0	0	0	1	0	1
1695	0	18	1	1	159	52	20.5688	3	2	2	3930	3	1	0	1	0	1	0	0	0	1	1	1	0	0	0	0	0	0	0	0	1	1	1	1
1696	0	29	2	2	161	52	20.061	3	2	2	4265	4	2	0	0	0	1	1	0	1	1	0	1	1	0	1	1	0	0	1	0	0	0	#NULL!	2
1697	0	51	5	2	167	61	21.8724	3	2	2	4420	4	2	1	0	1	1	1	1	1	1	1	1	1	0	0	0	1	0	1	0	0	1	#NULL!	3
1698	0	50	4	1	156	46	18.902	3	2	2	3875	3	2	1	1	1	0	1	0	1	0	0	1	1	1	1	0	1	0	0	0	1	0	1	1
1699	0	28	2	1	173	62	20.7157	3	2	2	3831	3	1	1	0	1	1	0	1	0	0	1	1	0	0	1	0	1	1	0	0	0	1	0	4
1700	0	18	1	1	173	65	21.7181	3	2	2	3672	3	2	0	0	0	0	0	1	0	1	0	0	1	0	0	1	0	0	1	0	0	1	1	1
1701	0	39	3	2	158	65	26.0375	3	2	2	3873	3	2	0	1	0	0	1	0	0	0	0	0	0	0	0	1	0	1	1	0	1	0	1	2
1702	0	18	1	1	158	56	22.4323	1	1	2	3750	3	2	0	0	1	0	1	0	1	0	0	1	1	0	1	1	0	0	1	0	0	1	1	1
1703	0	31	3	1	160	54	21.0938	2	2	2	2513	1	2	0	1	1	0	0	0	0	1	0	0	1	0	0	0	1	1	1	0	0	0	0	1
1704	0	63	5	1	158	63	25.2363	2	2	2	3475	2	2	1	0	0	1	0	0	0	0	1	1	0	0	0	1	0	1	1	0	1	0	1	1
1705	0	20	2	1	165	70	25.7117	3	2	2	4133	4	1	0	1	0	1	0	1	1	1	1	0	0	0	0	0	0	0	1	0	1	0	0	1
1706	0	45	4	2	170	78	26.9896	1	1	2	2527	1	2	0	0	1	0	1	0	1	1	1	1	1	0	1	1	0	1	0	0	1	0	0	2
1707	0	18	1	2	168	64	22.6757	3	2	2	3108	2	2	0	1	0	0	1	0	0	0	0	0	0	1	1	1	0	1	1	0	0	1	0	3
1708	0	50	5	2	178	64	20.1995	3	2	2	3181	2	2	1	0	0	1	1	1	1	1	1	0	0	0	0	0	1	0	0	0	0	0	1	1
1709	0	18	1	2	168	68	24.093	3	2	2	3455	2	1	1	1	1	1	0	0	1	0	1	1	0	1	1	0	1	1	0	0	1	0	0	3
1710	0	50	4	2	160	70	27.3438	3	2	2	3531	3	1	0	0	1	0	1	1	1	1	0	0	1	0	0	0	1	1	1	0	1	0	1	2
1711	0	18	1	1	169	72	25.2092	3	2	2	4027	4	1	1	0	1	0	0	1	1	0	0	1	1	1	0	0	0	0	1	0	0	1	1	4
1712	0	40	3	1	160	63	24.6094	3	2	2	3105	2	2	1	1	1	1	0	0	0	1	0	0	1	1	1	1	1	0	1	0	0	0	0	1
1713	0	18	1	2	171	62	21.2031	3	2	2	3290	2	2	1	1	0	0	0	0	1	0	1	0	0	0	0	1	1	1	1	0	0	1	0	3
1714	0	50	4	2	173	66	22.0522	3	2	2	3673	3	1	1	1	1	0	1	0	0	0	0	0	1	0	1	0	1	0	1	0	0	1	0	2
1715	0	29	2	1	167	68	24.3824	1	1	2	3053	2	1	0	0	1	1	1	0	1	1	0	0	1	0	0	0	0	0	1	0	0	0	1	2
1716	0	49	4	1	174	81	26.7539	2	2	2	3415	2	1	0	0	1	0	0	1	0	0	0	0	1	1	1	1	1	0	0	0	1	0	0	4
1717	0	39	3	2	178	77	24.3025	1	1	2	3782	3	2	0	1	1	1	0	0	1	0	1	0	1	0	0	1	0	0	1	0	1	0	1	1
1718	0	29	2	2	164	64	23.7954	3	2	2	4264	4	2	0	0	0	1	0	0	0	0	0	1	1	0	0	1	1	0	0	0	1	0	0	3
1719	0	38	3	1	163	54	20.3244	3	2	2	3059	2	2	1	0	1	0	0	1	1	0	0	0	1	1	1	1	1	1	1	0	0	0	1	4
1720	0	18	2	1	162	58	22.1003	3	2	2	3027	2	2	0	0	0	0	1	0	1	1	1	1	0	1	0	1	1	1	0	0	1	1	#NULL!	3
1721	0	38	3	1	161	52	20.061	3	2	2	3232	2	2	1	0	1	1	0	1	1	1	1	0	0	1	0	0	0	1	0	1	1	1	#NULL!	4
1722	0	49	4	2	171	74	25.3069	3	2	2	3275	2	1	0	1	0	0	1	0	1	1	0	1	0	1	0	0	1	1	0	0	1	0	#NULL!	2
1723	0	13	1	1	146	41	19.2344	3	2	2	2674	1	1	1	1	0	1	0	1	0	1	1	1	0	1	1	0	1	1	1	0	1	1	0	4
1724	0	18	1	2	175	67	21.8776	1	1	2	3012	2	2	1	1	1	1	1	0	0	1	0	0	0	0	1	0	0	1	0	0	0	1	1	3
1725	0	50	4	1	168	73	25.8645	2	2	2	3505	3	1	1	0	0	0	1	1	1	0	0	0	0	0	1	0	0	0	1	0	0	0	0	1
1726	0	18	2	1	168	63	22.3214	3	2	2	2838	1	1	1	1	1	0	0	1	0	0	1	1	1	0	1	0	0	1	0	0	0	1	1	3
1727	0	18	1	1	167	60	21.5139	3	2	2	3971	3	2	0	1	1	0	1	0	1	1	0	1	1	1	0	1	0	0	1	0	1	0	0	1
1728	0	50	4	1	161	66	25.462	3	2	2	3660	3	1	0	0	1	0	0	0	1	1	1	0	1	0	1	1	0	1	1	0	1	1	0	1
1729	0	10	1	1	140	43	21.9388	1	1	2	2584	1	1	0	1	1	1	1	0	0	1	0	0	0	0	0	0	0	0	0	0	1	0	1	1
1730	0	75	5	2	165	62	22.7732	3	2	2	3658	3	1	1	1	1	1	1	0	0	1	0	1	0	0	1	0	1	0	0	0	0	1	1	2
1731	0	30	2	1	170	70	24.2215	3	2	2	3791	3	2	1	0	0	1	0	0	0	0	1	1	0	0	1	0	0	0	1	0	0	1	1	3
1732	0	30	2	1	172	68	22.9854	3	2	2	3686	3	1	0	0	1	0	0	0	0	0	0	0	0	0	1	0	1	1	0	0	0	1	0	3
1733	0	75	5	2	174	57	18.8268	3	2	2	3611	3	1	0	1	0	1	0	0	1	1	1	0	1	1	0	0	1	1	1	0	1	0	1	3
1734	0	29	2	1	165	66	24.2424	4	3	2	3981	3	2	1	0	1	1	1	0	0	0	1	1	0	0	1	0	1	1	0	0	0	0	1	1
1735	0	39	3	1	169	71	24.8591	3	2	2	3470	2	1	0	1	1	0	0	0	1	1	1	1	0	1	0	0	1	1	1	0	0	0	0	3
1736	0	39	3	1	159	54	21.3599	3	2	2	3160	2	1	0	1	0	0	0	0	1	1	0	1	1	0	1	1	0	1	1	0	1	0	1	3
1737	0	13	1	1	170	63	21.7993	3	2	2	2699	1	1	1	0	1	1	0	1	0	0	0	0	1	0	0	0	0	0	1	0	1	1	0	4
1738	0	38	3	2	176	70	22.5981	3	2	2	3476	2	1	0	0	1	1	1	1	1	1	0	0	1	1	1	1	0	0	0	0	0	1	1	4
1739	0	18	1	2	164	60	22.3081	3	2	2	3584	3	2	1	1	1	0	1	1	1	1	0	1	1	1	1	1	0	1	0	0	0	1	1	2
1740	0	39	3	2	163	58	21.83	3	2	2	3752	3	1	0	1	1	0	1	1	0	1	1	0	0	1	1	0	1	0	0	0	1	0	1	2
1741	0	36	3	2	156	57	23.4221	3	2	2	4325	4	2	1	0	1	1	1	1	0	0	1	0	0	0	0	1	1	0	0	0	1	0	0	4
1742	0	24	2	1	172	73	24.6755	3	2	2	3030	2	1	0	0	0	0	1	0	1	0	1	1	0	0	1	0	1	1	0	0	0	0	0	2
1743	0	32	3	1	175	82	26.7755	3	2	2	4041	4	1	1	0	1	0	0	1	0	1	1	1	0	0	1	0	1	1	1	0	0	1	0	1
1744	0	36	3	2	176	75	24.2123	4	3	2	4348	4	2	0	1	1	0	0	1	0	1	1	1	1	0	1	1	1	1	1	0	0	1	1	4
1745	0	29	2	2	161	57	21.9899	1	1	2	3483	2	1	0	1	0	0	0	0	1	0	0	1	0	0	0	1	0	0	0	0	1	0	1	3
1746	0	40	3	2	156	67	27.5312	2	2	2	4159	4	1	1	0	1	1	0	0	1	1	1	1	0	1	1	0	1	1	1	0	1	1	1	1
1747	0	39	3	2	167	69	24.7409	2	2	2	3861	3	1	0	1	0	1	1	1	1	0	1	1	0	1	1	1	0	0	1	0	1	0	1	4
1748	0	36	3	1	163	72	27.0993	4	3	2	3169	2	2	0	0	1	0	0	1	0	0	1	0	1	0	1	0	1	1	1	0	0	1	1	2
1749	0	29	2	1	167	66	23.6652	4	3	2	3032	2	2	0	0	1	1	1	0	1	0	1	1	0	0	1	1	1	0	1	0	1	0	0	1
1750	0	20	2	1	163	62	23.3355	3	2	2	4268	4	2	0	0	1	1	0	0	0	1	1	1	0	0	1	0	0	0	1	0	1	0	1	2
1751	0	38	3	1	157	53	21.5019	4	3	2	3485	2	2	1	1	0	0	0	1	1	0	0	0	1	1	1	0	1	0	1	0	0	0	0	1
1752	0	29	2	1	161	61	23.533	3	2	2	3624	3	2	0	1	0	0	1	0	1	1	1	0	0	0	1	1	0	0	0	0	1	0	1	4
1753	0	39	3	1	173	81	27.0641	2	2	2	3875	3	1	1	1	0	0	0	1	1	1	0	0	1	1	0	0	0	0	1	0	1	1	0	2
1754	0	49	4	1	156	50	20.5457	2	2	2	3038	2	2	0	1	1	1	1	0	0	1	0	1	1	1	0	0	1	1	0	0	0	0	1	2
1755	0	49	4	2	159	67	26.5021	1	1	2	3355	2	2	0	0	1	1	1	0	1	1	0	1	0	1	1	1	0	1	0	0	0	1	1	3
1756	0	40	3	1	163	55	20.7008	2	2	2	3457	2	1	0	1	0	0	0	0	0	1	1	1	0	1	1	1	0	0	0	0	0	1	1	1
1757	0	50	4	1	161	67	25.8478	2	2	2	3853	3	1	0	1	1	0	1	1	1	1	0	0	0	0	1	0	0	1	0	0	0	0	1	3
1758	0	29	2	1	165	69	25.3444	1	1	2	3890	3	2	0	0	0	1	0	0	1	1	0	0	0	1	1	0	1	0	1	0	0	0	0	3
1759	0	52	5	1	167	55	19.721	2	2	2	2665	1	1	1	0	1	0	1	1	0	0	0	1	0	0	1	1	1	0	1	0	1	0	1	1
1760	0	18	1	1	158	54	21.6311	1	1	2	3056	2	2	0	0	0	1	1	0	0	1	1	1	1	0	1	0	1	0	1	0	1	0	0	2
1761	0	39	3	1	177	71	22.6627	4	3	2	3708	3	2	0	0	0	1	1	1	1	0	0	1	0	0	0	0	1	1	0	0	1	0	0	4
1762	0	29	2	1	163	60	22.5827	4	3	2	3768	3	2	0	0	1	0	0	0	0	0	0	1	1	0	0	1	0	0	0	0	0	1	1	3
1763	0	50	4	1	173	67	22.3863	2	2	2	3537	3	2	0	1	0	1	1	1	1	1	1	0	1	0	0	1	1	0	0	0	1	0	0	4
1764	0	50	4	1	173	68	22.7204	2	2	2	3729	3	2	1	0	0	1	1	0	1	0	1	1	1	1	0	0	1	0	1	0	1	1	0	4
1765	0	70	5	1	178	74	23.3556	3	2	2	4183	4	1	1	1	1	0	1	0	0	1	1	0	0	0	1	1	1	0	0	0	1	1	0	4
1766	0	18	1	1	162	65	24.7676	1	1	2	3714	3	2	0	1	1	0	1	1	1	1	0	0	1	1	1	0	0	1	0	0	0	0	0	4
1767	0	30	3	1	171	77	26.3329	3	2	2	3203	2	2	1	1	1	1	0	0	0	0	0	0	1	0	1	1	0	1	1	0	1	1	0	2
1768	0	38	3	1	162	53	20.1951	2	2	2	3014	2	2	1	0	0	0	0	1	1	0	1	1	1	0	0	0	1	1	0	0	0	0	0	2
1769	0	29	2	1	158	69	27.6398	4	3	2	3966	3	2	1	0	0	0	1	1	0	1	0	1	1	0	0	1	1	0	1	0	0	0	0	1
1770	0	14	1	1	161	70	27.0051	3	2	2	3951	3	2	1	0	0	0	0	0	1	0	1	0	1	1	0	1	0	1	1	0	0	1	0	4
1771	0	26	2	1	161	56	21.6041	4	3	2	2833	1	1	0	0	1	0	0	0	0	0	1	0	0	0	1	0	1	0	0	0	0	0	1	3
1772	0	54	5	1	162	69	26.2917	1	1	2	4341	4	2	0	1	1	0	1	0	0	0	1	1	0	1	0	0	0	0	1	0	0	0	1	1
1773	0	63	5	1	161	53	20.4467	3	2	2	3177	2	1	1	1	0	1	0	0	0	1	0	1	0	0	0	0	1	1	1	0	0	0	1	1
1774	0	39	3	1	175	78	25.4694	3	2	2	3919	3	2	0	1	0	1	1	0	1	0	0	1	1	1	1	1	0	1	0	0	0	1	1	3
1775	0	32	3	1	173	61	20.3816	3	2	2	2940	1	1	1	1	0	1	1	0	0	0	1	1	0	1	1	0	1	0	1	0	1	0	1	3
1776	0	39	3	2	175	64	20.898	3	2	2	3272	2	2	0	0	0	1	1	1	1	1	0	1	1	1	0	1	1	0	0	0	1	0	0	1
1777	0	29	2	1	169	79	27.6601	3	2	2	4307	4	2	1	0	0	0	0	0	0	1	0	1	1	1	0	1	0	1	1	0	1	0	1	3
1778	0	18	1	2	155	49	20.3954	1	1	2	3604	3	2	1	1	0	0	0	0	0	0	1	1	1	0	1	0	0	0	1	0	1	1	0	4
1779	0	79	5	2	169	71	24.8591	2	2	2	3919	3	1	0	1	1	1	1	1	0	0	1	0	1	1	0	0	0	0	1	0	0	0	1	4
1780	0	53	5	1	159	67	26.5021	3	2	2	2720	1	1	1	1	0	0	0	0	1	1	0	0	0	0	0	0	0	0	1	0	0	0	0	2
1781	0	18	1	1	159	50	19.7777	1	1	2	3852	3	2	0	0	1	0	0	0	0	0	1	1	1	1	1	1	0	0	1	0	0	1	1	4
1782	0	36	3	2	176	78	25.1808	2	2	2	3032	2	1	1	1	1	0	0	0	0	1	0	1	0	0	0	1	0	0	1	0	0	0	1	3
1783	0	29	2	1	173	66	22.0522	4	3	2	4428	4	1	0	1	0	1	1	0	1	1	1	1	0	0	0	0	1	1	1	0	0	1	0	3
1784	0	75	1	1	156	68	27.9421	1	1	2	3977	3	2	0	0	0	1	1	0	0	0	0	0	1	0	0	1	1	1	0	0	1	0	0	4
1785	0	39	3	2	163	62	23.3355	2	2	2	3875	3	2	1	0	1	0	1	0	1	0	0	0	1	1	1	1	1	1	0	0	1	1	0	2
1786	0	18	1	1	168	58	20.5499	1	1	2	4289	4	1	0	0	1	1	0	0	1	1	1	1	0	1	1	1	1	1	1	0	1	1	0	2
1787	0	18	1	1	157	47	19.0677	1	1	2	3332	2	1	1	1	1	1	1	1	1	1	1	1	1	1	1	0	0	0	1	0	0	0	0	4
1788	0	50	4	1	167	51	18.2868	2	2	2	3544	3	1	1	0	1	1	1	0	0	1	1	0	0	0	1	0	1	0	1	0	0	0	0	4
1789	0	55	5	1	161	66	25.462	2	2	2	4287	4	2	1	1	1	1	1	1	1	0	0	0	0	0	0	1	1	1	1	0	0	0	1	2
1790	0	37	3	1	156	58	23.833	1	1	2	4428	4	1	0	0	0	1	1	0	1	1	1	1	1	1	1	0	1	1	1	0	1	1	0	3
1791	0	39	3	1	165	66	24.2424	1	1	2	3631	3	2	0	0	1	1	1	0	1	1	1	1	0	1	0	0	1	0	1	0	0	1	1	1
1792	0	18	1	2	175	60	19.5918	1	1	2	3480	2	1	1	0	0	0	1	1	0	1	1	1	1	0	0	0	0	1	0	0	1	0	0	3
1793	0	50	4	1	157	47	19.0677	2	2	2	3559	3	2	0	0	1	1	1	1	0	1	1	1	1	1	0	1	1	0	0	0	1	1	1	1
1794	0	29	2	1	178	73	23.04	1	1	2	3367	2	2	0	0	0	0	0	0	1	1	0	1	1	0	0	0	1	0	0	0	1	1	0	3
1795	0	29	2	2	169	63	22.0581	4	3	2	3065	2	1	1	1	1	0	1	0	0	0	1	0	1	0	1	1	1	0	1	0	0	1	1	1
1796	0	49	4	1	176	77	24.858	2	2	2	3261	2	2	0	0	1	1	0	0	1	1	1	0	1	0	0	0	0	0	0	0	1	0	0	2
1797	0	29	2	1	162	55	20.9572	1	1	2	4306	4	2	0	0	0	1	0	0	0	1	0	1	0	1	0	1	0	1	1	0	1	0	0	1
1798	0	39	3	1	161	54	20.8325	4	3	2	3691	3	2	0	1	1	1	0	0	0	0	0	0	1	1	1	0	1	0	0	0	1	0	1	4
1799	0	75	1	1	167	75	26.8923	1	1	2	3947	3	2	0	0	1	0	0	1	1	1	0	0	0	0	1	1	0	0	1	0	1	0	0	4
1800	0	29	2	1	177	81	25.8546	3	2	2	3703	3	1	1	0	1	0	0	0	1	1	0	1	0	0	0	0	1	0	1	0	1	0	0	4
1801	0	65	5	1	156	46	18.902	2	2	2	4224	4	1	0	1	0	1	1	1	0	0	1	1	0	1	0	0	1	1	0	0	0	0	0	2
1802	0	17	1	1	174	61	20.148	1	1	2	3313	2	1	1	1	0	0	0	1	0	0	1	0	0	1	1	0	1	0	0	0	0	0	1	3
1803	0	35	3	1	157	68	27.5873	3	2	2	4040	4	2	1	0	0	0	0	1	1	0	0	1	0	0	1	1	0	1	0	0	0	1	0	3
1804	0	63	5	1	165	62	22.7732	1	1	2	3467	2	1	1	0	0	1	1	0	0	0	1	1	0	1	0	0	0	0	1	0	1	1	0	2
1805	0	53	5	1	173	64	21.3839	3	2	2	3481	2	1	0	0	1	1	0	0	1	1	0	1	1	1	1	1	1	0	0	0	0	1	1	3
1806	0	50	4	1	166	63	22.8625	3	2	2	3561	3	2	1	0	1	1	1	0	0	0	1	0	1	1	0	1	1	0	0	0	1	0	0	3
1807	0	39	3	1	162	69	26.2917	2	2	2	3784	3	1	0	0	0	0	1	0	1	0	0	1	1	1	1	1	1	1	0	0	1	0	1	4
1808	0	53	5	1	168	78	27.6361	3	2	2	2979	1	1	1	1	0	0	0	0	1	1	0	0	0	1	0	0	1	0	0	0	1	1	1	1
1809	0	40	4	1	159	47	18.591	3	2	2	2636	1	1	0	0	1	0	1	1	0	0	0	0	1	1	0	0	0	0	1	0	0	0	1	4
1810	0	39	3	2	158	58	23.2335	1	1	2	3536	3	1	0	1	1	0	0	0	1	0	1	0	0	0	0	1	1	1	0	0	1	1	0	3
1811	0	76	1	1	178	71	22.4088	3	2	2	3523	3	2	1	0	1	1	1	0	1	0	0	0	0	1	1	1	0	0	1	0	1	1	1	1
1812	0	39	3	1	158	63	25.2363	3	2	2	3787	3	2	1	0	1	0	0	0	0	1	1	0	1	0	1	1	0	1	0	0	0	0	0	4
1813	0	28	2	2	173	77	25.7276	1	1	2	3520	3	2	0	1	0	0	0	0	1	1	0	1	1	1	0	0	0	1	1	0	0	0	1	3
1814	0	29	2	1	165	55	20.202	1	1	2	3808	3	1	0	1	0	1	1	0	0	1	1	0	0	1	0	1	1	0	1	0	1	1	0	4
1815	0	29	2	1	157	59	23.9361	3	2	2	3751	3	2	0	1	1	0	1	0	1	1	0	1	0	0	1	1	0	1	0	0	0	0	0	4
1816	0	65	5	1	161	63	24.3046	2	2	2	4151	4	2	1	0	1	1	1	0	0	1	1	0	0	1	1	1	0	0	1	0	0	1	0	4
1817	0	18	2	1	164	55	20.4491	4	3	2	3295	2	1	1	0	0	0	1	1	1	1	0	1	1	1	0	1	1	1	1	0	0	0	1	1
1818	0	18	1	1	170	66	22.8374	1	1	2	3303	2	2	0	0	0	0	1	0	0	1	1	1	1	1	1	0	1	0	1	0	1	0	1	4
1819	0	29	2	1	162	64	24.3865	3	2	2	4223	4	2	1	1	0	0	0	1	0	0	1	1	0	0	1	1	1	1	1	0	1	1	1	2
1820	0	30	2	1	159	57	22.5466	3	2	2	3964	3	2	1	0	1	0	0	1	1	1	1	0	1	0	1	0	0	0	1	0	1	1	0	1
1821	0	39	3	1	178	61	19.2526	2	2	2	3822	3	1	1	0	1	1	0	1	1	1	0	0	0	0	0	1	0	0	1	0	0	1	0	3
1822	0	18	1	1	163	69	25.9701	1	1	2	3694	3	1	1	1	0	0	1	0	1	1	0	1	1	1	1	1	1	1	1	0	0	1	0	1
1823	0	17	1	1	157	60	24.3418	3	2	2	2714	1	1	1	1	1	1	1	0	0	1	0	0	1	0	1	0	1	0	0	0	0	0	0	2
1824	0	50	4	1	156	54	22.1893	3	2	2	3553	3	1	0	0	0	1	0	0	1	1	0	0	0	1	0	1	0	1	0	0	1	1	1	1
1825	0	39	3	1	165	72	26.4463	4	3	2	3958	3	2	1	1	0	1	1	0	1	0	1	1	0	1	0	0	1	1	0	0	0	1	0	1
1826	0	36	3	1	164	67	24.9108	4	3	2	4179	4	2	1	0	0	0	1	0	1	1	1	1	0	1	0	1	1	0	0	0	0	0	0	1
1827	0	50	4	1	173	77	25.7276	3	2	2	3836	3	2	1	1	1	1	0	1	1	1	0	1	0	1	1	1	1	1	1	0	0	0	1	2
1828	0	50	4	2	159	60	23.7332	2	2	2	3799	3	2	0	0	0	1	1	0	0	1	0	1	1	0	1	0	0	0	0	0	0	1	1	3
1829	0	36	3	1	167	52	18.6453	2	2	2	3204	2	1	1	0	1	1	0	1	0	1	1	0	0	1	0	0	1	0	0	0	0	0	1	1
1830	0	29	2	2	169	53	18.5568	4	3	2	3632	3	1	1	0	1	1	1	0	1	0	0	1	0	1	1	0	1	1	1	0	0	0	1	1
1831	0	18	1	1	161	62	23.9188	1	1	2	3393	2	1	0	1	1	0	1	0	1	1	0	0	1	0	1	0	1	0	0	0	1	0	0	3
1832	0	18	1	1	171	79	27.0169	1	1	2	3814	3	2	1	0	0	0	1	0	0	1	1	0	1	1	1	0	1	1	0	0	0	0	1	2
1833	0	50	4	2	155	58	24.1415	2	2	2	3960	3	1	0	1	0	0	1	1	0	1	1	0	0	0	0	0	1	1	0	0	0	0	0	2
1834	0	36	3	2	170	66	22.8374	2	2	2	4014	4	1	0	1	0	0	0	1	1	1	0	0	0	0	0	0	0	0	1	0	1	0	0	3
1835	0	50	4	1	176	65	20.984	2	2	2	3776	3	1	1	1	0	0	1	0	1	0	0	1	0	1	0	1	1	1	1	0	1	1	1	2
1836	0	62	5	1	176	63	20.3383	3	2	2	4382	4	2	1	0	1	1	1	1	0	1	0	1	0	1	1	1	1	0	0	0	0	1	1	4
1837	0	18	1	2	163	60	22.5827	1	1	2	3353	2	1	1	1	1	0	0	0	0	1	1	1	0	1	0	0	0	1	0	0	0	0	0	2
1838	0	39	3	1	170	69	23.8754	3	2	2	2600	1	1	1	1	0	1	0	0	0	0	1	1	1	1	1	1	0	0	0	0	0	1	1	2
1839	0	30	2	1	163	64	24.0882	4	3	2	3219	2	2	1	0	1	1	0	0	1	0	0	0	1	0	0	1	1	0	1	0	1	1	1	2
1840	0	32	3	1	156	56	23.0112	2	2	2	2644	1	1	0	1	0	1	0	0	0	1	0	0	0	1	0	1	1	0	0	0	0	1	0	1
1841	0	39	3	2	162	51	19.433	3	2	2	3345	2	2	0	0	1	0	0	1	0	1	0	0	0	0	1	0	1	1	0	0	0	0	1	4
1842	0	32	3	1	170	65	22.4913	1	1	2	4138	4	1	0	1	0	1	1	0	1	1	0	1	0	0	0	0	1	1	1	0	1	0	1	2
1843	0	18	1	2	173	72	24.0569	1	1	2	3671	3	2	1	1	1	1	1	1	1	1	0	1	1	1	0	1	0	0	1	0	0	0	0	2
1844	0	49	4	2	159	64	25.3155	2	2	2	3482	2	2	0	1	0	1	0	1	0	1	1	0	1	0	0	0	1	0	0	0	0	0	0	1
1845	0	66	5	1	159	68	26.8977	2	2	2	4335	4	2	1	0	0	0	0	1	1	1	0	1	1	1	1	0	1	0	0	0	0	0	1	2
1846	0	18	1	1	168	58	20.5499	1	1	2	4136	4	1	0	1	1	1	1	0	0	0	1	1	1	1	1	0	1	1	0	0	1	0	1	4
1847	0	39	3	1	164	58	21.5645	4	3	2	3930	3	2	0	0	0	1	0	0	0	1	0	0	1	1	1	0	1	1	1	0	0	0	0	4
1848	0	29	2	2	166	67	24.3141	3	2	2	4063	4	1	1	1	1	0	0	0	1	1	0	1	0	1	1	1	1	1	0	0	0	0	1	4
1849	0	31	4	2	159	55	21.7555	2	2	2	2731	1	2	0	1	1	1	0	1	0	1	1	0	1	0	1	0	1	0	1	0	0	1	1	3
1850	0	18	1	1	169	61	21.3578	3	2	2	3066	2	2	1	1	0	1	0	1	1	1	1	0	0	1	0	1	0	1	0	0	0	0	1	2
1851	0	37	3	2	170	56	19.3772	4	3	2	4321	4	2	1	1	0	1	1	1	1	0	0	1	0	1	1	1	0	1	0	0	1	0	1	2
1852	0	29	2	2	159	59	23.3377	1	1	2	4038	4	2	0	1	1	0	0	0	1	0	1	0	1	0	1	1	0	1	0	0	1	1	0	4
1853	0	50	5	2	172	75	25.3515	2	2	2	3182	2	2	1	1	1	0	0	1	1	1	1	0	0	1	0	1	0	0	0	0	1	1	1	2
1854	0	40	3	2	161	70	27.0051	1	1	2	3082	2	2	0	0	1	1	1	0	1	0	0	0	1	1	1	1	0	1	1	0	0	1	0	4
1855	0	18	1	2	161	59	22.7615	1	1	2	4029	4	1	0	0	0	1	0	0	0	0	1	1	0	0	0	1	1	1	0	0	1	1	1	2
1856	0	29	2	2	164	54	20.0773	4	3	2	3324	2	1	1	0	1	1	1	0	1	1	1	0	0	1	1	0	0	1	1	0	1	1	1	4
1857	0	35	3	1	174	58	19.1571	3	2	2	2667	1	1	0	1	1	0	1	0	0	0	1	1	1	1	1	1	1	0	0	0	0	1	1	2
1858	0	38	3	1	165	67	24.6097	2	2	2	3436	2	2	1	0	1	1	1	0	1	0	0	1	1	1	0	0	0	1	0	0	0	0	1	2
1859	0	15	1	1	171	72	24.623	1	1	2	4180	4	1	1	1	0	1	1	1	0	0	0	0	1	0	0	1	0	0	1	0	1	0	0	2
1860	0	75	5	2	159	62	24.5243	1	1	2	3557	3	1	0	1	1	0	1	0	1	0	0	1	1	0	0	1	0	1	0	0	0	0	1	1
1861	0	50	4	1	163	71	26.7229	2	2	2	3786	3	2	1	0	0	1	1	1	1	1	0	1	0	1	0	1	1	1	1	0	0	0	0	3
1862	0	19	2	2	154	45	18.9745	4	3	2	4017	4	1	1	1	0	1	0	0	0	0	0	1	1	0	0	0	0	0	1	0	1	0	1	1
1863	0	18	1	1	174	62	20.4783	1	1	2	4197	4	1	1	1	1	0	1	1	0	1	0	0	1	1	1	0	1	1	1	0	0	1	1	2
1864	0	39	3	1	161	64	24.6904	4	3	2	3677	3	2	1	1	0	0	1	1	1	1	0	1	1	1	1	0	1	0	1	0	0	0	0	1
1865	0	50	4	2	171	68	23.255	2	2	2	3656	3	2	1	0	0	0	1	0	1	1	0	1	0	0	0	1	0	1	1	0	1	1	0	4
1866	0	18	1	1	169	71	24.8591	1	1	2	3345	2	2	1	1	1	0	0	1	0	1	1	1	0	1	0	0	0	1	1	0	0	0	0	1
1867	0	39	3	1	165	66	24.2424	2	2	2	2695	1	2	0	1	0	1	1	1	0	0	0	0	1	0	1	1	0	1	0	0	0	0	0	1
1868	0	28	2	1	159	61	24.1288	4	3	2	3136	2	2	1	1	0	0	0	0	0	0	1	0	0	0	0	0	1	1	0	0	0	0	0	4
1869	0	54	5	1	164	62	23.0518	2	2	2	4121	4	2	1	1	0	1	1	1	1	1	1	0	0	0	1	1	1	0	1	0	1	0	1	2
1870	0	18	2	1	163	64	24.0882	4	3	2	3116	2	2	0	1	0	0	1	1	1	1	1	0	1	1	1	1	1	0	0	0	1	0	1	4
1871	0	39	3	2	161	63	24.3046	2	2	2	3821	3	1	0	0	0	1	0	0	1	1	1	0	1	0	0	0	0	1	0	0	1	0	1	3
1872	0	50	4	1	164	72	26.7698	2	2	2	3633	3	1	1	1	1	0	0	0	0	1	0	1	0	1	1	0	1	0	0	0	0	0	0	4
1873	0	18	2	1	156	58	23.833	4	3	2	3144	2	2	1	1	1	0	0	1	0	1	1	0	0	0	1	0	1	1	0	0	1	0	1	1
1874	0	18	1	2	158	62	24.8358	1	1	2	3831	3	1	1	1	1	0	1	1	1	1	1	1	0	1	0	0	0	1	1	0	0	0	1	4
1875	0	50	4	1	169	57	19.9573	2	2	2	3562	3	2	1	0	0	0	1	1	0	0	1	0	0	0	1	0	1	1	1	0	0	0	0	4
1876	0	29	2	1	167	50	17.9282	4	3	2	3393	2	2	1	0	0	1	0	1	0	0	1	0	1	0	1	1	0	0	0	0	0	1	1	4
1877	0	23	2	1	163	51	19.1953	3	2	2	2993	1	1	0	0	0	0	0	0	1	0	0	0	1	0	1	1	0	0	1	0	0	1	1	1
1878	0	18	1	2	173	83	27.7323	1	1	2	3090	2	1	1	1	1	1	1	0	1	1	1	1	0	0	0	0	0	1	0	0	0	0	0	2
1879	0	18	1	1	176	68	21.9525	3	2	2	3733	3	2	1	0	1	1	0	0	0	1	1	0	0	0	1	1	0	1	1	0	0	1	1	4
1880	0	39	3	2	157	50	20.2848	3	2	2	3047	2	1	0	0	1	1	0	1	1	1	0	1	1	0	1	0	0	1	1	0	1	0	1	4
1881	0	20	2	2	161	55	21.2183	3	2	2	3113	2	2	1	1	1	0	0	0	1	0	0	0	1	1	1	0	0	1	0	0	1	0	0	4
1882	0	43	4	1	158	45	18.026	3	2	2	3213	2	2	1	1	1	1	0	0	0	1	1	0	0	0	1	1	0	1	1	0	0	1	0	4
1883	0	75	1	1	166	64	23.2254	1	1	2	3503	3	2	0	1	1	0	1	0	1	0	1	0	1	0	0	0	0	0	0	0	0	1	1	3
1884	0	29	2	2	169	72	25.2092	3	2	2	3578	3	2	0	1	1	1	0	0	1	1	0	1	0	0	1	1	0	1	0	0	0	0	1	4
1885	0	18	1	1	167	71	25.4581	3	2	2	2708	1	1	1	1	1	1	0	1	0	0	0	0	0	1	0	1	1	1	1	0	1	1	1	4
1886	0	38	3	1	176	79	25.5036	3	2	2	2873	1	1	1	1	1	0	0	1	1	0	1	1	1	1	0	0	1	0	1	0	0	0	1	4
1887	0	75	1	2	169	62	21.7079	1	1	2	3901	3	2	0	1	0	1	0	1	1	0	0	1	1	0	1	1	1	0	0	0	0	0	1	2
1888	0	39	3	1	173	74	24.7252	3	2	2	3724	3	2	1	1	1	1	1	0	0	1	1	0	0	0	1	1	0	1	1	0	0	0	1	3
1889	0	63	5	2	162	57	21.7193	2	2	2	3491	2	1	1	1	1	1	1	0	1	1	1	1	1	1	1	1	1	0	1	0	0	0	0	3
1890	0	29	2	1	177	67	21.3859	3	2	2	3815	3	2	1	1	0	1	0	0	0	0	0	1	0	1	1	0	1	0	1	0	0	1	1	2
1891	0	18	1	1	156	44	18.0802	1	1	2	3868	3	2	0	1	1	0	0	0	0	1	0	1	1	1	1	0	1	1	0	0	0	0	0	2
1892	0	40	3	1	167	74	26.5338	3	2	2	3436	2	2	1	0	0	0	1	1	1	1	0	0	0	0	0	1	0	1	1	0	1	0	1	1
1893	0	50	4	2	165	55	20.202	3	2	2	3978	3	2	0	0	0	0	0	1	0	1	0	1	1	1	0	1	1	0	0	0	0	1	0	4
1894	0	17	1	2	173	62	20.7157	3	2	2	2872	1	1	1	1	0	0	1	0	0	0	0	0	1	0	1	1	1	1	0	0	0	0	1	1
1895	0	50	4	1	166	58	21.048	2	2	2	3817	3	1	1	1	1	0	0	0	1	0	1	1	1	1	0	0	0	0	0	0	0	0	1	1
1896	0	57	5	1	178	78	24.6181	3	2	2	2579	1	1	0	1	0	0	1	0	1	0	1	1	1	0	0	1	0	1	0	0	0	0	0	1
1897	0	38	3	1	161	47	18.132	2	2	2	3215	2	1	0	0	1	1	1	0	1	1	0	1	1	0	0	1	1	1	0	0	0	1	0	4
1898	0	39	3	1	162	66	25.1486	2	2	2	3643	3	1	0	1	1	1	0	1	0	1	0	0	1	1	0	1	1	0	0	0	0	1	0	3
1899	0	50	4	1	169	63	22.0581	2	2	2	3762	3	1	1	1	1	0	0	1	0	0	0	0	0	0	0	1	1	1	1	0	1	1	1	3
1900	0	30	2	1	165	69	25.3444	1	1	2	3591	3	1	0	0	1	1	1	0	0	0	1	1	0	1	1	0	0	1	1	0	0	1	0	3
1901	0	15	1	2	158	45	18.026	1	1	2	3370	2	1	0	0	1	0	0	0	1	1	0	1	1	0	1	0	1	1	0	0	1	1	1	2
1902	0	18	1	2	167	59	21.1553	1	1	2	2817	1	2	0	1	1	1	0	0	0	0	0	0	1	0	1	0	0	0	0	0	1	1	1	1
1903	0	40	4	2	157	60	24.3418	3	2	2	3025	2	1	0	0	1	0	1	1	0	1	1	1	1	1	1	1	1	1	1	0	1	1	1	4
1904	0	39	3	1	160	73	28.5156	3	2	2	3831	3	2	1	0	0	1	0	0	1	1	1	0	0	0	1	1	0	1	0	0	1	1	0	1
1905	0	75	1	2	160	52	20.3125	1	1	2	3696	3	2	0	0	1	0	0	0	1	1	1	0	0	0	0	1	1	1	1	0	0	0	0	4
1906	0	35	3	1	168	73	25.8645	2	2	2	3088	2	1	1	0	0	1	0	1	0	1	1	0	0	1	1	1	1	0	1	0	0	0	1	4
1907	0	53	5	1	176	63	20.3383	2	2	2	2517	1	1	1	0	1	1	1	1	0	1	0	1	0	1	0	1	1	0	0	0	1	1	1	4
1908	0	50	4	2	155	62	25.8065	2	2	2	3791	3	1	0	1	1	1	0	0	0	0	0	1	0	1	0	1	1	0	0	0	0	1	0	2
1909	0	18	1	1	156	62	25.4767	1	1	2	3656	3	2	0	0	1	1	1	1	1	0	1	0	1	0	1	1	0	1	1	0	1	0	0	3
1910	0	51	5	2	164	67	24.9108	2	2	2	4311	4	2	0	1	1	0	0	1	0	0	1	1	1	0	1	0	0	1	0	0	1	0	1	1
1911	0	39	3	2	168	77	27.2817	4	3	2	3950	3	2	0	0	1	0	0	0	1	1	1	0	1	0	1	0	1	1	1	0	0	1	1	4
1912	0	18	1	2	167	60	21.5139	3	2	2	2746	1	1	1	1	1	1	0	0	1	1	0	1	0	0	0	0	0	1	1	0	1	0	0	1
1913	0	18	1	2	167	72	25.8166	3	2	2	2599	1	1	0	1	0	0	1	0	1	0	1	1	0	1	0	1	1	1	0	0	0	1	0	4
1914	0	50	4	2	172	65	21.9713	2	2	2	3949	3	2	1	1	1	1	1	1	0	0	1	1	1	1	1	1	0	1	0	0	1	1	1	4
1915	0	18	1	1	167	50	17.9282	1	1	2	3727	3	2	0	0	0	0	1	1	1	0	1	1	1	0	1	0	1	1	1	0	0	0	1	1
1916	0	50	5	2	167	67	24.0238	2	2	2	3354	2	1	0	0	1	0	0	0	0	0	1	1	1	0	0	1	1	0	0	0	1	0	1	2
1917	0	50	4	1	168	68	24.093	2	2	2	3539	3	2	0	1	0	1	0	1	1	0	0	0	1	0	0	0	1	0	1	0	1	1	1	3
1918	0	34	3	1	164	65	24.1672	4	3	2	3410	2	2	0	1	0	1	0	1	0	1	0	0	0	1	1	1	1	1	0	0	1	0	0	2
1919	0	21	2	2	154	51	21.5045	4	3	2	3444	2	2	0	0	0	0	0	1	1	0	1	1	1	1	1	0	1	0	1	0	0	0	1	1
1920	0	56	5	1	165	66	24.2424	2	2	2	3083	2	2	1	0	0	1	1	0	0	1	0	1	0	1	1	0	0	0	0	0	1	1	1	2
1921	0	76	1	1	157	66	26.7759	1	1	2	3967	3	2	1	0	1	1	0	0	1	0	1	0	0	0	1	1	1	1	0	0	1	0	1	3
1922	0	50	4	1	171	61	20.8611	2	2	2	3556	3	2	0	0	1	1	1	1	0	0	1	1	0	1	0	0	0	1	0	0	1	1	1	3
1923	0	31	3	1	166	77	27.9431	1	1	2	2616	1	1	0	1	1	0	0	0	1	0	0	1	0	0	1	0	1	1	0	0	1	1	1	4
1924	0	29	2	1	166	72	26.1286	4	3	2	3459	2	2	0	0	1	1	0	0	1	0	0	1	0	0	1	1	0	0	0	0	1	1	1	2
1925	0	29	2	1	159	60	23.7332	4	3	2	3640	3	2	1	0	1	0	1	0	1	0	0	1	1	0	1	1	0	1	1	0	0	1	1	4
1926	0	18	1	1	172	59	19.9432	1	1	2	3011	2	2	1	1	1	0	1	0	0	0	1	0	0	1	0	0	0	0	1	0	0	0	0	3
1927	0	66	5	1	157	53	21.5019	1	1	2	3329	2	2	0	0	0	0	1	0	1	1	0	0	0	0	1	0	0	1	1	0	1	1	0	4
1928	0	36	3	1	174	77	25.4327	2	2	2	3370	2	2	0	0	0	1	1	1	1	1	1	0	0	1	0	1	0	0	0	0	0	1	0	4
1929	0	36	3	1	177	73	23.3011	2	2	2	3324	2	2	1	1	0	1	1	0	0	1	0	0	0	0	1	1	1	1	1	0	1	0	1	3
1930	0	29	2	1	170	66	22.8374	4	3	2	4411	4	2	1	1	0	0	0	0	1	1	0	0	1	0	1	1	0	1	1	0	1	0	1	2
1931	0	39	3	1	177	61	19.4708	2	2	2	3486	2	2	0	0	0	0	0	0	0	0	0	0	0	0	1	1	1	0	0	0	0	0	0	4
1932	0	58	5	2	159	53	20.9644	2	2	2	3487	2	1	0	1	0	0	1	1	0	0	0	0	1	0	0	0	1	0	1	0	1	0	0	3
1933	0	18	1	1	161	62	23.9188	1	1	2	3637	3	1	0	1	1	0	0	1	0	1	1	1	0	1	0	1	0	1	0	0	0	0	1	3
1934	0	29	2	1	171	63	21.5451	4	3	2	3518	3	2	1	0	0	1	1	0	1	0	0	0	0	0	0	0	1	0	0	0	0	1	1	4
1935	0	40	3	2	165	62	22.7732	4	3	2	3857	3	2	1	0	0	0	1	1	0	1	1	0	0	0	0	1	1	1	0	0	0	0	0	4
1936	0	39	3	1	166	72	26.1286	4	3	2	3663	3	2	0	0	0	1	1	0	0	0	0	0	0	1	1	0	1	0	1	0	1	1	1	4
1937	0	32	3	1	174	84	27.7447	4	3	2	4059	4	2	1	1	0	1	1	0	1	0	1	1	0	1	0	1	1	0	0	0	1	1	0	3
1938	0	18	1	1	156	53	21.7784	1	1	2	3871	3	1	0	0	1	0	1	0	1	0	0	0	1	0	0	1	0	1	1	0	0	1	1	4
1939	0	40	4	2	164	52	19.3337	1	1	2	4104	4	1	0	0	0	0	1	0	0	0	0	0	0	1	0	0	0	1	1	0	1	1	0	2
1940	0	18	2	1	176	86	27.7634	1	1	2	4263	4	1	0	0	1	0	1	0	1	1	0	1	0	1	1	1	1	0	0	0	1	0	0	3
1941	0	29	2	1	170	80	27.6817	3	2	2	3822	3	1	0	1	1	0	1	0	0	1	0	1	1	0	1	0	1	1	1	0	0	1	0	1
1942	0	49	4	1	172	57	19.2672	2	2	2	3295	2	1	1	0	1	0	0	0	0	0	1	1	1	1	0	1	0	1	1	0	1	0	0	4
1943	0	39	3	2	176	85	27.4406	4	3	2	3840	3	2	1	1	1	1	0	0	0	1	1	0	0	1	1	1	1	0	0	0	0	0	0	2
1944	0	29	2	1	174	76	25.1024	4	3	2	3784	3	2	1	0	1	1	1	0	0	1	1	0	0	0	1	1	1	0	0	0	1	0	0	4
1945	0	39	3	1	172	73	24.6755	4	3	2	3916	3	2	0	1	1	0	0	1	1	1	0	1	1	1	0	0	1	1	0	0	1	0	1	2
1946	0	39	3	1	168	72	25.5102	2	2	2	3367	2	2	0	0	1	1	0	1	0	0	1	1	0	1	0	1	0	0	1	0	1	0	1	1
1947	0	28	2	1	156	57	23.4221	4	3	2	3484	2	1	1	1	0	0	0	0	1	1	0	1	0	1	1	0	0	0	0	0	1	0	1	2
1948	0	29	2	1	166	56	20.3223	3	2	2	3788	3	2	0	0	0	1	0	0	0	1	1	0	0	0	0	0	1	0	0	0	0	1	0	3
1949	0	50	4	2	162	72	27.4348	2	2	2	3522	3	1	0	1	0	1	1	1	0	1	1	0	1	0	1	1	0	0	1	0	0	0	1	3
1950	0	29	2	1	177	65	20.7476	1	1	2	3440	2	2	0	0	0	0	0	0	0	1	0	1	0	0	0	0	1	0	0	0	0	1	1	3
1951	0	29	2	1	161	64	24.6904	3	2	2	4281	4	2	0	0	0	1	0	0	0	0	0	0	1	1	1	0	0	1	1	0	0	1	1	3
1952	0	38	3	2	161	53	20.4467	1	1	2	3277	2	2	0	1	1	1	1	0	1	0	1	0	1	0	0	1	1	1	0	0	1	1	0	4
1953	0	28	2	1	165	64	23.5078	3	2	2	4318	4	2	1	0	1	1	1	1	0	1	0	0	1	0	0	0	0	1	1	0	1	0	1	2
1954	0	18	1	2	165	49	17.9982	1	1	2	3585	3	2	0	1	0	0	0	1	0	0	0	0	0	0	1	1	0	1	1	0	1	0	1	3
1955	0	38	3	1	167	71	25.4581	2	2	2	3077	2	2	0	0	0	0	0	1	1	1	1	1	1	0	1	0	1	1	0	0	0	0	1	4
1956	0	49	4	1	156	54	22.1893	2	2	2	3435	2	2	1	0	1	1	1	0	1	1	0	0	0	1	0	1	1	0	1	0	1	0	0	4
1957	0	79	5	1	177	82	26.1738	2	2	2	3798	3	1	0	0	0	0	0	0	1	0	0	0	1	0	1	1	0	0	0	0	0	0	1	2
1958	0	10	1	2	150	53	23.5556	1	1	2	4100	4	1	0	1	1	0	0	0	0	1	0	1	0	0	0	0	0	0	0	0	0	1	0	2
1959	0	29	2	1	160	73	28.5156	1	1	2	3719	3	2	1	0	0	1	0	1	0	0	0	1	1	1	1	0	1	1	1	0	0	1	0	3
1960	0	72	5	2	157	53	21.5019	1	1	2	3609	3	1	0	1	0	0	0	1	0	0	1	1	1	1	1	0	0	0	0	0	1	0	1	3
1961	0	39	3	1	156	55	22.6003	1	1	2	3946	3	2	0	1	0	0	1	1	0	0	1	1	0	0	1	1	0	0	0	0	1	0	0	1
1962	0	24	2	1	163	65	24.4646	1	1	2	2639	1	2	0	0	0	1	0	0	0	0	1	1	1	1	1	0	1	0	0	0	1	0	1	4
1963	0	41	4	1	173	74	24.7252	1	1	2	2528	1	1	0	0	0	0	1	1	1	1	0	1	1	0	1	0	0	0	1	0	1	0	0	4
1964	0	50	4	2	164	68	25.2826	1	1	2	3538	3	2	0	0	1	1	1	1	0	1	1	0	1	0	1	1	1	0	0	0	1	1	0	2
1965	0	39	3	1	173	74	24.7252	1	1	2	3249	2	2	0	0	1	0	1	0	0	1	1	1	0	0	0	0	0	1	0	0	0	0	0	2
1966	0	39	3	2	171	72	24.623	1	1	2	3605	3	2	0	1	0	0	1	0	0	1	0	1	1	0	1	1	1	1	1	0	0	1	1	2
1967	0	18	1	1	168	79	27.9904	1	1	2	3850	3	2	1	1	0	1	1	0	1	0	0	1	0	0	1	0	0	0	0	0	1	0	1	2
1968	0	39	3	2	169	61	21.3578	1	1	2	3921	3	2	1	0	1	1	1	1	1	1	1	0	1	1	1	1	1	0	1	0	0	1	0	1
1969	0	18	1	2	163	60	22.5827	4	3	2	4382	4	1	0	1	0	0	0	1	1	1	0	1	1	1	0	1	0	0	1	0	1	0	1	2
1970	0	50	4	1	176	68	21.9525	2	2	2	3704	3	2	0	1	1	0	1	0	1	0	0	0	0	0	1	1	1	0	0	0	1	0	1	3
1971	0	66	5	1	162	52	19.8141	2	2	2	3273	2	1	1	1	1	1	0	1	0	0	1	0	1	1	1	1	0	1	0	0	0	1	1	4
1972	0	18	1	2	158	60	24.0346	1	1	2	3224	2	2	0	1	0	1	1	1	1	0	1	1	1	1	0	0	0	0	1	0	0	0	1	1
1973	0	39	3	2	157	58	23.5304	2	2	2	3795	3	1	0	1	0	1	1	1	1	1	0	0	0	1	0	1	1	1	1	0	1	0	0	3
1974	0	41	4	1	170	69	23.8754	2	2	2	2753	1	1	0	0	1	0	1	0	1	1	1	1	1	1	1	1	0	1	1	0	1	1	0	3
1975	0	30	2	1	173	62	20.7157	4	3	2	3847	3	1	1	1	1	0	0	1	1	1	1	1	1	0	1	0	0	0	0	0	1	0	0	1
1976	0	26	2	1	167	70	25.0995	4	3	2	3064	2	1	1	0	1	0	0	1	1	0	0	1	0	1	1	0	1	0	1	0	0	1	0	1
1977	0	33	3	2	160	58	22.6562	2	2	2	2860	1	2	0	0	0	1	1	1	0	0	0	0	0	0	1	1	0	0	0	0	1	0	1	3
1978	0	54	5	1	169	67	23.4586	2	2	2	2732	1	1	0	0	0	0	0	1	0	1	1	0	1	0	0	1	0	0	0	0	1	0	0	3
1979	0	29	2	1	156	63	25.8876	4	3	2	3599	3	2	1	0	0	1	1	1	1	1	1	0	1	0	1	0	0	1	1	0	1	0	1	4
1980	0	39	3	2	158	62	24.8358	2	2	2	3531	3	1	1	0	0	0	0	0	1	1	1	0	0	1	1	0	0	0	0	0	0	0	0	4
1981	0	18	1	1	156	60	24.6548	1	1	2	4133	4	1	0	0	1	0	1	1	0	0	0	0	0	1	1	0	1	0	1	0	1	1	0	3
1982	0	39	3	1	162	60	22.8624	4	3	2	3669	3	2	0	1	1	1	1	0	0	0	1	1	1	0	1	1	1	1	1	0	0	1	0	1
1983	0	36	3	1	163	49	18.4425	1	1	2	4007	4	1	0	0	1	0	0	0	1	0	0	0	1	1	0	1	1	1	0	0	0	0	1	3
1984	0	18	1	2	165	53	19.4674	1	1	2	3700	3	2	1	1	0	1	0	0	1	1	0	1	1	1	1	1	1	1	1	0	1	0	0	4
1985	0	13	1	1	130	43	25.4438	1	1	2	2927	1	2	0	1	0	1	1	0	1	0	1	0	0	0	0	1	0	0	0	0	0	0	0	4
1986	0	56	5	1	155	67	27.8876	2	2	2	3373	2	1	1	1	0	0	0	0	0	0	1	0	0	1	1	0	1	0	1	0	1	1	0	2
1987	0	18	1	1	175	68	22.2041	1	1	2	3906	3	2	1	0	0	0	0	0	1	0	1	1	1	0	0	1	0	1	0	0	0	0	0	4
1988	0	30	2	1	170	61	21.1073	3	2	2	3800	3	2	0	1	0	0	1	1	1	0	0	0	1	1	1	0	0	0	0	0	1	1	1	3
1989	0	18	1	2	160	64	25	1	1	2	4474	4	1	0	1	0	1	1	0	0	0	1	0	1	0	0	0	0	0	0	0	1	1	0	3
1990	0	18	1	2	171	68	23.255	1	1	2	3859	3	2	0	0	1	1	1	0	1	1	1	0	1	0	1	0	0	1	1	0	0	0	1	4
1991	0	65	5	1	175	73	23.8367	2	2	2	4479	4	2	1	0	1	0	1	1	1	1	0	0	1	0	0	1	0	1	1	0	0	0	0	3
1992	0	17	1	1	170	63	21.7993	1	1	2	2832	1	2	0	1	0	1	0	0	1	1	0	1	1	0	0	0	0	0	0	0	1	0	1	2
1993	0	39	3	1	169	68	23.8087	1	1	2	3334	2	2	0	0	1	0	0	0	1	1	1	1	0	1	0	1	1	1	1	0	1	1	0	3
1994	0	18	1	1	164	55	20.4491	1	1	2	3788	3	2	0	0	1	1	1	1	1	0	0	1	0	0	1	1	0	1	1	0	1	1	0	2
1995	0	34	3	1	167	59	21.1553	4	3	2	4437	4	2	0	1	1	0	0	0	1	0	0	1	1	0	1	0	0	0	1	0	0	0	0	4
1996	0	63	5	2	162	65	24.7676	2	2	2	3052	2	2	1	0	1	1	1	1	1	0	1	0	1	0	1	0	0	1	1	0	0	0	1	3
1997	0	50	4	1	171	63	21.5451	2	2	2	3659	3	2	1	1	0	0	0	0	0	1	1	1	0	0	1	1	1	0	0	0	0	1	1	1
1998	0	39	3	1	157	57	23.1247	4	3	2	3670	3	2	0	0	1	0	0	0	0	1	1	0	1	0	1	0	0	0	1	0	1	1	1	2
1999	0	29	2	2	175	86	28.0816	4	3	2	3322	2	2	0	1	1	1	1	1	1	0	0	0	0	0	0	0	1	0	1	0	0	1	0	2
[truncated: 3,681 more rows]
